# Supplementary material for: The prognostic significance of KLRB1 and its further association with immune cells in breast cancer
Source: PeerJ. 2023 Jul 24;11:e15654. doi: 10.7717/peerj.15654 (PMC10373647; doi:10.7717/peerj.15654)
Supplement: File S1 [file peerj-11-15654-s002.xlsx]

## Sheet: Sheet1
sampleID	age	gender	histological_type	molecular_subtype	ER	PR	HER2	menopause_status	T_classification	N_classification	M_classification	stage	lymph_node_status	margin_status	vital_status	radiation_therapy	neoadjuvant_treatment	targeted_molecular_therapy	sample_type	os_t	os_s	rfs_t	rf_s	KLRB1	type
TCGA.3C.AAAU.01	<60	FEMALE	Infiltrating Lobular Carcinoma		Positive	Positive	Negative	Pre	TX	NX	MX	X	YES	Negative	LIVING	NO	No		Primary Tumor	4047	0	4047	0	low	1
TCGA.3C.AALI.01	<60	FEMALE	Infiltrating Ductal Carcinoma		Positive	Positive	Positive	Post	T2	N1	M0	II	YES	Negative	LIVING	YES	No		Primary Tumor	4005	0	4005	0	high	1
TCGA.3C.AALJ.01	>=60	FEMALE	Infiltrating Ductal Carcinoma		Positive	Positive	Indeterminate	Post	T2	N1	M0	II	YES	Negative	LIVING	NO	No		Primary Tumor	1474	0	1474	0	high	1
TCGA.3C.AALK.01	<60	FEMALE	Infiltrating Ductal Carcinoma		Positive	Positive	Positive		T1	N0	M0	I	YES	Close	LIVING	NO	No		Primary Tumor	1448	0	1448	0	high	1
TCGA.4H.AAAK.01	<60	FEMALE	Infiltrating Lobular Carcinoma		Positive	Positive	Equivocal	Post	T2	N2	M0	III	YES	Negative	LIVING	NO	No		Primary Tumor	348	0	348	0	high	1
TCGA.5L.AAT0.01	<60	FEMALE	Infiltrating Lobular Carcinoma		Positive	Positive	Negative	Post	T2	N0	M0	II	YES	Positive	LIVING	YES	No		Primary Tumor	1477	0	1477	0	high	1
TCGA.5L.AAT1.01	>=60	FEMALE	Infiltrating Lobular Carcinoma		Positive	Positive	Equivocal	Post	T2	N0	M1	IV	YES	Negative	LIVING	NO	No		Primary Tumor	1471	0	1471	0	high	1
TCGA.5T.A9QA.01	<60	FEMALE	Other		Positive	Negative	Equivocal		T2	NX	MX	II	NO		LIVING	YES	No		Primary Tumor	303	0	303	0	low	1
TCGA.A1.A0SB.01	>=60	FEMALE	Other	Normal	Positive	Negative	Negative	Post	T1	N0	M0	I	YES	Negative	LIVING		No		Primary Tumor	259	0			low	1
TCGA.A1.A0SD.01	<60	FEMALE	Infiltrating Ductal Carcinoma	LumA	Positive	Positive	Negative		T2	N0	M0	II	YES	Positive	LIVING		No		Primary Tumor	437	0			high	1
TCGA.A1.A0SE.01	<60	FEMALE	Other	LumA	Positive	Positive	Negative	Pre	T1	N0	M0	I		Negative	LIVING		No		Primary Tumor	1321	0			high	1
TCGA.A1.A0SF.01	<60	FEMALE	Infiltrating Ductal Carcinoma	LumA	Positive	Positive	Negative	Pre	T2	N0	M0	II	YES	Negative	LIVING		No		Primary Tumor	1463	0			high	1
TCGA.A1.A0SG.01	>=60	FEMALE	Other	LumA	Positive	Positive	Negative	Post	T2	N1	M0	II	YES	Negative	LIVING		No		Primary Tumor	434	0			high	1
TCGA.A1.A0SH.01	<60	FEMALE	Infiltrating Ductal Carcinoma	LumA	Negative	Positive	Equivocal	Pre	T2	N0	M0	II		Negative	LIVING		No		Primary Tumor	1437	0			high	1
TCGA.A1.A0SI.01	<60	FEMALE	Infiltrating Ductal Carcinoma	LumB	Positive	Positive	Negative		T2	N1	M0	II	YES	Negative	LIVING		No		Primary Tumor	635	0			high	1
TCGA.A1.A0SJ.01	<60	FEMALE	Infiltrating Ductal Carcinoma	LumA	Positive	Positive	Equivocal		T3	N1	M0	III		Negative	LIVING		No		Primary Tumor	416	0			high	1
TCGA.A1.A0SK.01	<60	FEMALE	Other	Basal	Negative	Negative	Negative	Inde	T2	N0	M0	II		Positive	DECEASED		No		Primary Tumor	967	1			low	1
TCGA.A1.A0SM.01	>=60	MALE	Infiltrating Ductal Carcinoma	LumA	Positive	Negative	Positive		T2	N0	M0	II		Negative	LIVING		No		Primary Tumor	242	0			low	1
TCGA.A1.A0SN.01	<60	FEMALE	Infiltrating Ductal Carcinoma	LumB	Positive	Positive	Positive	Post	T1	N1	MX	II	YES	Negative	LIVING		No		Primary Tumor	1196	0			high	1
TCGA.A1.A0SO.01	>=60	FEMALE	Infiltrating Ductal Carcinoma	Basal	Negative	Negative	Equivocal	Post	T2	N1	M0	II		Negative	LIVING		No		Primary Tumor	852	0			low	1
TCGA.A1.A0SP.01	<60	FEMALE	Infiltrating Ductal Carcinoma	Basal	Negative	Negative	Negative		T2	N0	M0	II		Negative	LIVING				Primary Tumor	584	0			high	1
TCGA.A1.A0SQ.01	<60	FEMALE	Infiltrating Ductal Carcinoma	LumA	Positive	Positive	Negative	Pre	T2	N1	MX	II	YES	Negative	LIVING		No		Primary Tumor	554	0			high	1
TCGA.A2.A04N.01	>=60	FEMALE	Infiltrating Ductal Carcinoma	LumA	Positive	Positive		Post	T1	N0	M0	I		Negative	LIVING	YES	No	YES	Primary Tumor	4354	0	4354	0	high	1
TCGA.A2.A04P.01	<60	FEMALE	Infiltrating Ductal Carcinoma	Basal	Negative	Negative		Pre	T2	N3	M0	III		Positive	DECEASED	YES	No	YES	Primary Tumor	548	1	179	1	high	1
TCGA.A2.A04Q.01	<60	FEMALE	Infiltrating Ductal Carcinoma	Basal	Negative	Negative	Equivocal	Post	T1	N0	M0	I		Negative	LIVING	NO	No	YES	Primary Tumor	2385	0			high	1
TCGA.A2.A04R.01	<60	FEMALE	Infiltrating Ductal Carcinoma	LumB	Positive	Positive	Equivocal	Pre	T1	N0	M0	I		Negative	LIVING	YES	No	YES	Primary Tumor	3709	0	3709	0	low	1
TCGA.A2.A04T.01	>=60	FEMALE	Infiltrating Ductal Carcinoma	Basal	Negative	Negative	Equivocal	Post	T2	N0	M0	II		Negative	LIVING	YES	No	YES	Primary Tumor	2246	0			high	1
TCGA.A2.A04U.01	<60	FEMALE	Infiltrating Ductal Carcinoma	Basal	Negative	Negative	Negative	Peri	T2	N0	M0	II		Negative	LIVING	NO	No	YES	Primary Tumor	2654	0			low	1
TCGA.A2.A04V.01	<60	FEMALE	Infiltrating Ductal Carcinoma	LumA	Positive	Positive	Equivocal	Pre	T2	N0	M0	II		Negative	DECEASED	NO	No	YES	Primary Tumor	1920	1			high	1
TCGA.A2.A04W.01	<60	FEMALE	Other	Her2	Negative	Negative	Positive	Pre	T2	N1	M0	II		Negative	LIVING	NO	No	YES	Primary Tumor	3102	0	3102	0	high	1
TCGA.A2.A04X.01	<60	FEMALE	Infiltrating Ductal Carcinoma	Her2	Positive	Positive	Positive	Pre	T2	N0	M0	II		Negative	LIVING	NO	No	YES	Primary Tumor	1686	0			high	1
TCGA.A2.A04Y.01	<60	FEMALE	Infiltrating Ductal Carcinoma	LumB	Positive	Positive	Negative	Post	T2	N1	M0	II		Negative	LIVING	YES	No	YES	Primary Tumor	1099	0			high	1
TCGA.A2.A0CK.01	>=60	FEMALE	Infiltrating Lobular Carcinoma		Positive	Positive	Negative	Post	T3	N2	M0	III	YES	Positive	LIVING	YES	No		Primary Tumor	4159	0	1364	1	high	1
TCGA.A2.A0CL.01	<60	FEMALE	Infiltrating Ductal Carcinoma	Normal	Positive	Positive	Negative	Pre	T3	N2	M0	III		Positive	LIVING	YES	No	YES	Primary Tumor	3015	0	3015	0	high	1
TCGA.A2.A0CM.01	<60	FEMALE	Infiltrating Ductal Carcinoma	Basal	Negative	Negative	Negative	Pre	T2	N0	M0	II		Negative	DECEASED	NO	No	YES	Primary Tumor	754	1			high	1
TCGA.A2.A0CO.01	>=60	FEMALE	Infiltrating Lobular Carcinoma		Positive	Positive	Negative	Post	T3	N0	M0	II	YES	Positive	DECEASED	YES	No		Primary Tumor	3492	1	3492	0	high	1
TCGA.A2.A0CP.01	>=60	FEMALE	Infiltrating Ductal Carcinoma	LumA	Positive	Positive		Post	T1	N0	M0	I		Negative	LIVING	YES	No	YES	Primary Tumor	2813	0	2813	0	high	1
TCGA.A2.A0CQ.01	>=60	FEMALE	Infiltrating Ductal Carcinoma	LumA	Positive	Positive	Equivocal	Post	T1	N0	M0	I		Positive	LIVING	YES	No	YES	Primary Tumor	2695	0	2695	0	high	1
TCGA.A2.A0CR.01	<60	FEMALE	Infiltrating Lobular Carcinoma		Positive	Positive	Negative	Post	T3	N0	M0	II	YES	Close	LIVING	NO	No		Primary Tumor	3283	0	3283	0	high	1
TCGA.A2.A0CS.01	>=60	FEMALE	Infiltrating Ductal Carcinoma	LumA	Positive	Positive	Equivocal	Post	T4	N3	M1	IV		Positive	DECEASED	YES	No	YES	Primary Tumor	2348	1	2348	0	low	1
TCGA.A2.A0CT.01	>=60	FEMALE	Infiltrating Ductal Carcinoma	LumA	Positive	Negative	Equivocal	Post	T2	N0	M0	II		Negative	LIVING	NO	No	YES	Primary Tumor	2289	0	2289	0	low	1
TCGA.A2.A0CU.01	>=60	FEMALE	Infiltrating Ductal Carcinoma	LumA	Positive	Positive	Equivocal	Post	T2	N0	M0	II		Close	DECEASED	NO	No	YES	Primary Tumor	158	1	158	0	low	1
TCGA.A2.A0CV.01	<60	FEMALE	Infiltrating Ductal Carcinoma	LumA	Positive	Positive	Negative	Post	T2	N1	M0	II		Negative	LIVING	YES	No	YES	Primary Tumor	3011	0	3011	0	high	1
TCGA.A2.A0CW.01	>=60	FEMALE	Infiltrating Ductal Carcinoma	LumB	Positive	Positive	Equivocal	Post	T2	N1	M0	II		Negative	LIVING	NO	No	YES	Primary Tumor	3283	0	3283	0	low	1
TCGA.A2.A0CX.01	<60	FEMALE	Infiltrating Ductal Carcinoma	Her2	Positive	Negative	Positive	Pre	T2	N0	M0	II		Negative	LIVING	YES	No	YES	Primary Tumor	1728	0	1728	0	high	1
TCGA.A2.A0CY.01	>=60	FEMALE	Infiltrating Ductal Carcinoma		Positive	Positive	Negative	Post	T2	N1	M0	II		Negative	LIVING	NO	No	YES	Primary Tumor	1673	0	1673	0	low	1
TCGA.A2.A0CZ.01	<60	FEMALE	Infiltrating Ductal Carcinoma	Normal	Positive	Positive	Negative	Peri	T2	N0	M0	II		Positive	LIVING	NO	No	YES	Primary Tumor	1616	0	1616	0	high	1
TCGA.A2.A0D0.01	>=60	FEMALE	Infiltrating Ductal Carcinoma	Basal	Negative	Negative	Negative	Post	T2	N0	M0	II		Negative	LIVING	NO	No	YES	Primary Tumor	2048	0	2048	0	high	1
TCGA.A2.A0D1.01	>=60	FEMALE	Infiltrating Ductal Carcinoma	Her2	Negative	Negative	Positive	Post	T2	N0	M0	II		Negative	LIVING	YES	No	YES	Primary Tumor	1051	0	1051	0	low	1
TCGA.A2.A0D2.01	<60	FEMALE	Infiltrating Ductal Carcinoma	Basal	Negative	Negative	Negative	Pre	T2	N0	M0	II		Negative	LIVING	YES	No	YES	Primary Tumor	1027	0	1027	0	high	1
TCGA.A2.A0D3.01	<60	FEMALE	Infiltrating Ductal Carcinoma	LumA	Positive	Positive	Negative	Post	T1	N0	M0	I		Negative	LIVING	NO	No	YES	Primary Tumor	1873	0	1873	0	high	1
TCGA.A2.A0D4.01	<60	FEMALE	Infiltrating Ductal Carcinoma	LumB	Positive	Positive	Negative	Pre	T2	N1	M0	II		Negative	LIVING	YES	No	YES	Primary Tumor	767	0	767	0	low	1
TCGA.A2.A0EM.01	>=60	FEMALE	Infiltrating Ductal Carcinoma	LumA	Positive	Positive		Post	T1	N0	M0	I		Negative	LIVING	YES	No	YES	Primary Tumor	3094	0	3094	0	low	1
TCGA.A2.A0EN.01	>=60	FEMALE	Infiltrating Lobular Carcinoma	LumA	Positive	Positive	Equivocal	Post	T2	N0	M0	II		Negative	LIVING	YES	No	YES	Primary Tumor	2718	0	2718	0	high	1
TCGA.A2.A0EO.01	<60	FEMALE	Infiltrating Ductal Carcinoma	LumA	Positive	Positive	Negative	Peri	T1	N0	M0	I		Close	LIVING	YES	No	YES	Primary Tumor	2442	0	2442	0	high	1
TCGA.A2.A0EP.01	<60	FEMALE	Infiltrating Lobular Carcinoma		Positive	Negative	Negative	Post	T1	N0	M0	I	YES	Negative	LIVING	NO	No		Primary Tumor	3603	0	3603	0	high	1
TCGA.A2.A0EQ.01	>=60	FEMALE	Infiltrating Ductal Carcinoma	Her2	Negative	Negative	Positive	Post	T2	N0	M0	II		Positive	LIVING	YES	No	YES	Primary Tumor	2426	0	2426	0	high	1
TCGA.A2.A0ER.01	>=60	FEMALE	Infiltrating Ductal Carcinoma	LumA	Positive	Positive	Equivocal	Post	T1	N1	M0	I		Positive	LIVING	YES	No	YES	Primary Tumor	2263	0	2263	0	high	1
TCGA.A2.A0ES.01	<60	FEMALE	Infiltrating Lobular Carcinoma	LumA	Positive	Positive	Negative	Post	T2	N0	M0	II		Negative	LIVING	NO	No	YES	Primary Tumor	2190	0	2190	0	high	1
TCGA.A2.A0ET.01	<60	FEMALE	Infiltrating Ductal Carcinoma	LumA	Positive	Positive	Equivocal	Post	T2	N2	M0	III		Negative	LIVING	YES	No	YES	Primary Tumor	1066	0	1066	0	low	1
TCGA.A2.A0EU.01	>=60	FEMALE	Infiltrating Ductal Carcinoma	LumA	Positive	Positive	Negative	Post	T1	N0	M0	I		Positive	LIVING	YES	No	NO	Primary Tumor	1043	0	1043	0	low	1
TCGA.A2.A0EV.01	>=60	FEMALE	Infiltrating Ductal Carcinoma	LumA	Positive	Positive	Negative	Post	T1	N0	M0	I		Negative	LIVING	NO	No	NO	Primary Tumor	968	0	968	0	high	1
TCGA.A2.A0EW.01	<60	FEMALE	Infiltrating Lobular Carcinoma	LumA	Positive	Positive	Negative	Post	T1	N3	M0	III		Positive	DECEASED	YES	No	YES	Primary Tumor	1884	1	1353	1	high	1
TCGA.A2.A0EX.01	<60	FEMALE	Infiltrating Lobular Carcinoma	LumA	Positive	Positive	Negative	Post	T3	N0	M0	II		Positive	LIVING	NO	No	YES	Primary Tumor	752	0	752	0	high	1
TCGA.A2.A0EY.01	>=60	FEMALE	Infiltrating Ductal Carcinoma	LumB	Positive	Negative	Positive	Post	T2	N1	M0	II		Negative	LIVING	YES	No	YES	Primary Tumor	1925	0	1925	0	high	1
TCGA.A2.A0ST.01	>=60	FEMALE	Infiltrating Ductal Carcinoma	Basal	Negative	Negative		Post	T1	N1	M0	II		Negative	LIVING	YES	No	YES	Primary Tumor	3017	0			high	1
TCGA.A2.A0SU.01	>=60	FEMALE	Infiltrating Ductal Carcinoma	LumA	Positive	Positive	Negative	Post	T2	N0	M0	II		Negative	LIVING	NO	No	YES	Primary Tumor	1662	0	1662	0	high	1
TCGA.A2.A0SV.01	>=60	FEMALE	Infiltrating Ductal Carcinoma	LumB	Positive	Positive	Equivocal	Post	T2	N2	M1	IV		Positive	DECEASED	YES	No	YES	Primary Tumor	825	1			low	1
TCGA.A2.A0SW.01	>=60	FEMALE	Infiltrating Ductal Carcinoma	LumB	Positive	Negative		Post	T2	N2	M1	IV		Negative	DECEASED	YES	No	YES	Primary Tumor	1365	1			high	1
TCGA.A2.A0SX.01	<60	FEMALE	Infiltrating Ductal Carcinoma	Basal	Negative	Negative	Negative	Pre	T1	N0	M0	I		Positive	LIVING	YES	No	YES	Primary Tumor	1534	0	1534	0	high	1
TCGA.A2.A0SY.01	>=60	FEMALE	Infiltrating Lobular Carcinoma	LumA	Positive	Positive		Post	T3	N1	M0	III		Negative	LIVING	YES	No	YES	Primary Tumor	1347	0	1347	0	high	1
TCGA.A2.A0T0.01	<60	FEMALE	Infiltrating Ductal Carcinoma	Basal	Negative	Negative	Negative	Post	T2	N1	M0	II		Negative	LIVING	YES	No	YES	Primary Tumor	533	0	533	0	high	1
TCGA.A2.A0T1.01	<60	FEMALE	Infiltrating Ductal Carcinoma	Her2	Negative	Negative	Positive	Post	T3	N3	M0	III		Negative	LIVING	YES	No	YES	Primary Tumor	521	0	521	0	high	1
TCGA.A2.A0T2.01	>=60	FEMALE	Infiltrating Ductal Carcinoma	Basal	Negative	Negative	Negative	Post	T3	N3	M1	IV		Close	DECEASED	NO	No	NO	Primary Tumor	255	1			low	1
TCGA.A2.A0T3.01	<60	FEMALE	Infiltrating Ductal Carcinoma	LumB	Positive	Positive	Equivocal	Pre	T1	N1	M0	I	YES	Positive	LIVING	YES	No	YES	Primary Tumor	1516	0	1516	0	high	1
TCGA.A2.A0T4.01	>=60	FEMALE	Infiltrating Lobular Carcinoma	LumA	Positive	Positive	Equivocal	Post	T2	N0	M0	II		Negative	LIVING	NO	No	YES	Primary Tumor	624	0	624	0	high	1
TCGA.A2.A0T5.01	<60	FEMALE	Infiltrating Ductal Carcinoma	LumA	Positive	Positive	Negative	Pre	T2	N0	M0	II		Negative	LIVING	NO	No	YES	Primary Tumor	531	0	531	0	low	1
TCGA.A2.A0T6.01	<60	FEMALE	Infiltrating Lobular Carcinoma	LumA	Positive	Positive	Negative	Pre	T3	N0	M0	II		Negative	LIVING	YES	No	YES	Primary Tumor	575	0	575	0	high	1
TCGA.A2.A0T7.01	<60	FEMALE	Infiltrating Ductal Carcinoma	LumA	Positive	Positive	Negative	Pre	T2	N0	M0	II		Positive	LIVING	NO	No	YES	Primary Tumor	631	0	631	0	high	1
TCGA.A2.A0YC.01	<60	FEMALE	Infiltrating Ductal Carcinoma	LumA	Positive	Positive		Post	T2	N1	M0	II		Close	LIVING	YES	No	YES	Primary Tumor	990	0	798	1	low	1
TCGA.A2.A0YD.01	>=60	FEMALE	Infiltrating Lobular Carcinoma	LumA	Positive	Positive		Post	T3	N0	M0	II		Negative	LIVING	NO	No	YES	Primary Tumor	769	0	769	0	high	1
TCGA.A2.A0YE.01	<60	FEMALE	Infiltrating Ductal Carcinoma	Basal	Negative	Negative	Negative	Post	T2	N1	M0	II		Negative	LIVING	YES	No	YES	Primary Tumor	554	0	554	0	low	1
TCGA.A2.A0YF.01	>=60	FEMALE	Infiltrating Ductal Carcinoma	LumA	Positive	Negative	Negative	Post	T1	N0	M0	I		Negative	LIVING	NO	No	YES	Primary Tumor	1535	0	1535	0	high	1
TCGA.A2.A0YG.01	>=60	FEMALE	Infiltrating Ductal Carcinoma	LumB	Positive	Positive	Positive	Post	T2	N3	M0	III		Negative	LIVING	YES	No	YES	Primary Tumor	666	0	666	0	low	1
TCGA.A2.A0YH.01	<60	FEMALE	Infiltrating Ductal Carcinoma	LumB	Positive	Positive	Negative	Post	T2	N2	M0	III		Negative	LIVING	YES	No	YES	Primary Tumor	659	0	659	0	high	1
TCGA.A2.A0YI.01	>=60	FEMALE	Infiltrating Ductal Carcinoma	LumA	Positive	Positive	Negative	Post	T1	N0	M0	I		Negative	LIVING	YES	No	YES	Primary Tumor	1505	0	1505	0	high	1
TCGA.A2.A0YJ.01	<60	FEMALE	Infiltrating Ductal Carcinoma	Basal	Positive	Negative	Negative	Pre	T3	N2	M0	III		Negative	LIVING	YES	No	YES	Primary Tumor	566	0	559	1	low	1
TCGA.A2.A0YK.01	>=60	FEMALE	Infiltrating Lobular Carcinoma	Normal	Positive	Negative	Negative	Post	T2	N0	M0	II		Close	LIVING	NO	No	YES	Primary Tumor	588	0	588	0	high	1
TCGA.A2.A0YL.01	<60	FEMALE	Infiltrating Lobular Carcinoma	LumA	Positive	Positive	Negative	Pre	T3	N2	M0	III		Negative	LIVING	YES	No	YES	Primary Tumor	1474	0	1474	0	high	1
TCGA.A2.A0YM.01	>=60	FEMALE	Infiltrating Ductal Carcinoma	Basal	Negative	Negative		Post	T2	N0	M0	II		Negative	LIVING	YES	No	NO	Primary Tumor	965	0	965	0	low	1
TCGA.A2.A0YT.01	<60	FEMALE	Infiltrating Ductal Carcinoma	LumB	Positive	Negative		Post	T4	N2	M0	III		Negative	DECEASED	YES	Yes	YES	Primary Tumor	723	1	723	0	low	1
TCGA.A2.A1FV.01	>=60	FEMALE	Infiltrating Lobular Carcinoma	LumA	Positive	Positive	Negative	Post	T3	N0	M0	II	YES	Negative	LIVING	YES	No	YES	Primary Tumor	714	0	714	0	high	1
TCGA.A2.A1FW.01	>=60	FEMALE	Infiltrating Ductal Carcinoma	LumB	Positive	Negative	Negative	Post	T3	N2	M0	III	YES	Negative	LIVING	YES	No	YES	Primary Tumor	528	0	528	0	high	1
TCGA.A2.A1FX.01	>=60	FEMALE	Infiltrating Ductal Carcinoma	LumB	Positive	Positive		Post	T3	N2	M0	III	YES	Positive	LIVING	YES	No	YES	Primary Tumor	1847	0	1847	0	high	1
TCGA.A2.A1FZ.01	>=60	FEMALE	Infiltrating Ductal Carcinoma	LumA	Positive	Positive	Negative	Post	T2	N0	M0	II	YES	Negative	LIVING	NO	No	YES	Primary Tumor	683	0	683	0	high	1
TCGA.A2.A1G0.01	<60	FEMALE	Other	LumA	Positive	Positive	Equivocal	Pre	T2	N1	M0	II	YES	Negative	LIVING	YES	No	YES	Primary Tumor	616	0	616	0	high	1
TCGA.A2.A1G1.01	>=60	FEMALE	Infiltrating Ductal Carcinoma	Basal	Negative	Negative	Equivocal	Post	T2	N1	M0	II	YES	Negative	LIVING	YES	No	NO	Primary Tumor	584	0	584	0	high	1
TCGA.A2.A1G4.01	>=60	FEMALE	Infiltrating Ductal Carcinoma	LumB	Positive	Positive	Negative	Post	T3	N1	M0	III	YES	Negative	LIVING	NO	No	YES	Primary Tumor	595	0	595	0	low	1
TCGA.A2.A1G6.01	<60	FEMALE	Infiltrating Ductal Carcinoma	Normal	Negative	Negative	Negative	Pre	T2	N2	M0	III	YES	Negative	LIVING	YES	No	YES	Primary Tumor	501	0	501	0	high	1
TCGA.A2.A259.01	>=60	FEMALE	Infiltrating Ductal Carcinoma	LumA	Positive	Positive	Negative	Post	T1	N0	M0	I	YES	Close	LIVING	NO	No	YES	Primary Tumor	1596	0	1596	0	high	1
TCGA.A2.A25A.01	<60	FEMALE	Infiltrating Lobular Carcinoma	Normal	Positive	Positive	Equivocal	Pre	T2	N0	M0	II	YES	Negative	LIVING	YES	No	YES	Primary Tumor	3276	0	3276	0	high	1
TCGA.A2.A25B.01	<60	FEMALE	Infiltrating Ductal Carcinoma	LumB	Positive	Positive	Equivocal	Pre	T2	N1	M0	II	YES	Close	LIVING	YES	No	YES	Primary Tumor	1291	0	1290	1	low	1
TCGA.A2.A25C.01	<60	FEMALE	Infiltrating Ductal Carcinoma	LumB	Positive	Positive	Negative	Pre	T2	N1	M0	II	YES	Negative	LIVING	YES	No	YES	Primary Tumor	523	0	523	0	high	1
TCGA.A2.A25D.01	>=60	FEMALE	Infiltrating Lobular Carcinoma	LumA	Positive	Negative	Negative	Post	T2	N3	M0	III	YES	Positive	LIVING	YES	No	YES	Primary Tumor	552	0	552	0	high	1
TCGA.A2.A25E.01	<60	FEMALE	Infiltrating Ductal Carcinoma	LumB	Positive	Positive	Equivocal	Pre	T2	N2	M0	III	YES	Negative	LIVING	YES	No	YES	Primary Tumor	3204	0	2989	1	high	1
TCGA.A2.A25F.01	>=60	FEMALE	Infiltrating Ductal Carcinoma	Basal	Negative	Positive	Negative	Post	T2	N0	M0	II	YES	Negative	LIVING	YES	No	YES	Primary Tumor	322	0	322	0	high	1
TCGA.A2.A3KC.01	<60	FEMALE	Infiltrating Lobular Carcinoma	LumA	Positive	Positive	Equivocal	Pre	T2	N1	M0	II	YES	Negative	LIVING	YES	No		Primary Tumor	1102	0	1102	0	high	1
TCGA.A2.A3KD.01	<60	FEMALE	Other	LumA	Positive	Positive	Negative	Pre	T3	N1	M0	III	YES	Positive	LIVING	YES	No		Primary Tumor	1206	0	1206	0	high	1
TCGA.A2.A3XS.01	>=60	FEMALE	Infiltrating Ductal Carcinoma		Negative	Negative		Post	T1	N2	M0	III	YES	Positive	DECEASED	NO	No	YES	Primary Tumor	1032	1	682	1	high	1
TCGA.A2.A3XT.01	<60	FEMALE	Infiltrating Ductal Carcinoma		Negative	Negative	Negative	Pre	T2	N1	M0	II	YES	Negative	LIVING	YES	No		Primary Tumor	2770	0	2770	0	high	1
TCGA.A2.A3XU.01	<60	FEMALE	Infiltrating Ductal Carcinoma		Negative	Negative		Post	T2	N1	M0	II	YES	Negative	DECEASED	YES	No		Primary Tumor	912	1	596	1	low	1
TCGA.A2.A3XV.01	<60	FEMALE	Infiltrating Ductal Carcinoma		Positive	Negative	Equivocal	Pre	T2	N0	M0	II	YES	Negative	LIVING	YES	No		Primary Tumor	996	0	996	0	high	1
TCGA.A2.A3XW.01	<60	FEMALE	Infiltrating Ductal Carcinoma		Positive	Negative	Negative	Pre	T2	N1	M0	II	YES	Negative	LIVING	YES	No		Primary Tumor	1712	0	1712	0	high	1
TCGA.A2.A3XX.01	<60	FEMALE	Infiltrating Ductal Carcinoma		Negative	Negative	Negative	Post	T2	N0	M0	II	YES	Negative	DECEASED	NO	No		Primary Tumor	1439	1	1439	0	high	1
TCGA.A2.A3XY.01	<60	FEMALE	Infiltrating Ductal Carcinoma		Negative	Negative	Negative	Post	T2	N1	M0	II	YES	Negative	DECEASED	YES	No		Primary Tumor	1093	1	1072	1	high	1
TCGA.A2.A3XZ.01	<60	FEMALE	Infiltrating Ductal Carcinoma		Negative	Negative	Positive	Pre	T1	N0	M0	I	YES	Negative	LIVING	NO	No		Primary Tumor	1532	0	1532	0	high	1
TCGA.A2.A3Y0.01	<60	FEMALE	Infiltrating Ductal Carcinoma		Positive	Negative	Negative	Post	T2	N1	M0	II	YES	Close	LIVING	NO	No		Primary Tumor	1546	0	1546	0	high	1
TCGA.A2.A4RW.01	<60	FEMALE	Infiltrating Lobular Carcinoma		Positive	Positive	Negative	Pre	T2	N3	M0	III	YES	Negative	LIVING		No		Primary Tumor	222	0	222	0	high	1
TCGA.A2.A4RX.01	>=60	FEMALE	Other		Positive	Positive	Negative	Post	T2	N0	M0	II	YES	Negative	LIVING		No		Primary Tumor	742	0	742	0	high	1
TCGA.A2.A4RY.01	<60	FEMALE	Infiltrating Lobular Carcinoma		Positive	Positive	Negative	Pre	T3	N3	M0	III	YES	Negative	LIVING	YES	No		Primary Tumor	648	0	648	0	high	1
TCGA.A2.A4S0.01	>=60	FEMALE	Other		Positive	Positive	Negative	Post	T2	N0	M0	II	YES	Negative	LIVING	NO	No		Primary Tumor	706	0	706	0	low	1
TCGA.A2.A4S1.01	>=60	FEMALE	Other		Positive	Negative	Negative	Post	T2	N0	M0	II	YES	Negative	LIVING	YES	No		Primary Tumor	820	0	820	0	high	1
TCGA.A2.A4S2.01	>=60	FEMALE	Infiltrating Lobular Carcinoma		Positive	Positive	Negative	Post	T3	N2	M0	III	YES	Negative	LIVING	YES	No		Primary Tumor	643	0	643	0	high	1
TCGA.A2.A4S3.01	<60	FEMALE	Infiltrating Ductal Carcinoma		Positive	Positive	Negative	Post	T2	N1	M0	II	YES	Negative	LIVING		No		Primary Tumor	666	0	666	0	high	1
TCGA.A7.A0CD.01	>=60	FEMALE	Infiltrating Ductal Carcinoma	LumA	Positive	Positive	Equivocal	Inde	T1	N0	M0	I		Negative	LIVING	YES	No	YES	Primary Tumor	1165	0	1165	0	low	1
TCGA.A7.A0CE.01	<60	FEMALE	Infiltrating Ductal Carcinoma	Basal	Negative	Negative	Equivocal	Inde	T2	N0	M0	II		Negative	LIVING	YES	No	YES	Primary Tumor	1074	0	1074	0	high	1
TCGA.A7.A0CG.01	>=60	FEMALE	Other	LumA	Positive	Negative	Negative	Post	T2	N0	M0	II		Close	LIVING	YES	No	NO	Primary Tumor	1043	0	1043	0	high	1
TCGA.A7.A0CH.01	>=60	FEMALE	Infiltrating Ductal Carcinoma	LumA				Post	T2	N0	M0	II		Negative	LIVING	NO	No	YES	Primary Tumor	1079	0	1079	0	low	1
TCGA.A7.A0CJ.01	<60	FEMALE	Infiltrating Ductal Carcinoma	LumB	Positive	Positive	Negative	Post	T2	N0	M0	II		Positive	LIVING	YES	No	YES	Primary Tumor	931	0	931	0	low	1
TCGA.A7.A0D9.01	<60	FEMALE	Infiltrating Ductal Carcinoma	LumA	Positive	Negative	Negative	Pre	T2	N0	M0	II		Negative	LIVING	NO	No	YES	Primary Tumor	1139	0	1139	0	high	1
TCGA.A7.A0DA.01	>=60	FEMALE	Infiltrating Ductal Carcinoma	Basal	Negative	Negative	Negative	Post	T2	N0	M0	II		Negative	LIVING	YES	No	YES	Primary Tumor	1085	0	1085	0	low	1
TCGA.A7.A0DB.01	<60	FEMALE	Infiltrating Ductal Carcinoma	LumA	Positive	Positive	Negative	Post	T2	N0	M0	II		Close	LIVING	YES	No	YES	Primary Tumor	1007	0	1007	0	high	1
TCGA.A7.A0DC.01	>=60	FEMALE	Infiltrating Ductal Carcinoma	LumA	Positive	Negative	Negative	Post	T1	N0	M0	I		Negative	LIVING	YES	No	YES	Primary Tumor	906	0	906	0	low	1
TCGA.A7.A13D.01	<60	FEMALE	Infiltrating Ductal Carcinoma	Basal	Negative	Positive	Equivocal	Post	T2	N0	M0	II		Close	LIVING	YES	No	YES	Primary Tumor	965	0	965	0	low	1
TCGA.A7.A13E.01	>=60	FEMALE	Infiltrating Ductal Carcinoma	Basal	Positive	Negative	Equivocal	Post	T2	N1	MX	II		Negative	DECEASED	NO	No	YES	Primary Tumor	614	1	556	1	low	1
TCGA.A7.A13F.01	<60	FEMALE	Infiltrating Ductal Carcinoma	LumB	Positive	Positive	Equivocal	Pre	T3	N1	M0	III		Negative	LIVING	YES	No	YES	Primary Tumor	765	0	765	0	low	1
TCGA.A7.A13G.01	>=60	FEMALE	Infiltrating Ductal Carcinoma	LumA	Positive	Positive	Negative	Post	T2	N0	MX	II	YES	Negative	LIVING	NO	No	YES	Primary Tumor	718	0	586	1	low	1
TCGA.A7.A13H.01	>=60	FEMALE	Infiltrating Lobular Carcinoma		Positive	Positive	Equivocal	Post	T2	N1	MX	II	YES	Negative	LIVING	NO	No		Primary Tumor	899	0	795	1	high	1
TCGA.A7.A26E.01	>=60	FEMALE	Infiltrating Lobular Carcinoma	LumA	Positive	Positive	Negative	Post	T3	N1	MX	III	YES	Negative	LIVING	YES	No	YES	Primary Tumor	954	0	954	0	high	1
TCGA.A7.A26F.01	<60	FEMALE	Other	Basal	Negative	Negative	Equivocal	Post	T1	N0	M0	I	YES	Close	LIVING	YES	No	YES	Primary Tumor	738	0	738	0	high	1
TCGA.A7.A26G.01	<60	FEMALE	Other	Basal	Negative	Negative	Negative	Pre	T2	N0	M0	II	YES	Negative	LIVING	NO	No	YES	Primary Tumor	722	0	722	0	high	1
TCGA.A7.A26H.01	>=60	FEMALE	Infiltrating Ductal Carcinoma	LumA	Positive	Negative	Equivocal	Post	T1	N1	M0	II	YES	Negative	LIVING	NO	No	YES	Primary Tumor	724	0	311	1	low	1
TCGA.A7.A26I.01	>=60	FEMALE	Infiltrating Ductal Carcinoma	Basal	Negative	Negative	Equivocal	Post	T2	N0	M0	II	YES	Close	LIVING	YES	No	YES	Primary Tumor	661	0	661	0	low	1
TCGA.A7.A26J.01	<60	FEMALE	Infiltrating Ductal Carcinoma	LumA	Positive	Positive	Negative	Pre	T2	N0	M0	II	YES	Negative	LIVING	NO	No	YES	Primary Tumor	627	0	627	0	low	1
TCGA.A7.A2KD.01	<60	FEMALE	Infiltrating Ductal Carcinoma	LumB	Positive	Positive	Positive	Post	T2	N2	MX	III	YES	Negative	LIVING	YES	No	YES	Primary Tumor	679	0	679	0	high	1
TCGA.A7.A3IY.01	>=60	FEMALE	Other	LumA	Positive	Positive	Negative	Post	T1	N0	M0	I	YES	Close	LIVING	YES	No	YES	Primary Tumor	345	0	345	0	high	1
TCGA.A7.A3IZ.01	>=60	FEMALE	Infiltrating Lobular Carcinoma	LumA	Positive	Negative	Equivocal	Post	T2	N0	M0	II	YES	Positive	LIVING	YES	No		Primary Tumor	322	0	322	0	low	1
TCGA.A7.A3J0.01	>=60	FEMALE	Other	LumA	Positive	Positive	Negative	Post	T2	N0	M0	II	YES	Negative	LIVING	YES	No		Primary Tumor	313	0	313	0	low	1
TCGA.A7.A3J1.01	>=60	FEMALE	Infiltrating Lobular Carcinoma	LumA	Positive	Positive	Negative	Post	T1	N0	MX	I	YES	Negative	LIVING	YES	No		Primary Tumor	343	0	343	0	high	1
TCGA.A7.A3RF.01	>=60	FEMALE	Other		Positive	Positive	Negative	Post	T2	N0	M0	II	YES	Positive	LIVING	YES	No		Primary Tumor	408	0	174	1	low	1
TCGA.A7.A425.01	>=60	FEMALE	Infiltrating Lobular Carcinoma		Positive	Positive	Indeterminate	Post	T3	N3	MX	III	YES	Negative	LIVING	YES	No		Primary Tumor	447	0	419	1	high	1
TCGA.A7.A426.01	<60	FEMALE	Infiltrating Lobular Carcinoma		Positive	Positive	Negative	Pre	T3	N3	MX	III	YES	Negative	LIVING	YES	No		Primary Tumor	364	0	364	0	high	1
TCGA.A7.A4SA.01	<60	FEMALE	Infiltrating Lobular Carcinoma		Positive	Negative	Negative	Pre	T2	N1	M0	II	YES	Negative	LIVING	NO	No		Primary Tumor	454	0	454	0	high	1
TCGA.A7.A4SB.01	<60	FEMALE	Infiltrating Lobular Carcinoma		Positive	Positive	Negative	Post	T3	N1	M0	III	YES	Positive	LIVING	YES	No		Primary Tumor	418	0	418	0	low	1
TCGA.A7.A4SC.01	>=60	FEMALE	Infiltrating Lobular Carcinoma		Positive	Negative	Equivocal	Post	T3	N0	MX	II	YES	Negative	LIVING	YES	No		Primary Tumor	446	0	446	0	high	1
TCGA.A7.A4SD.01	<60	FEMALE	Infiltrating Ductal Carcinoma		Negative	Negative	Equivocal	Post	T2	N0	M0	II	YES	Negative	LIVING	NO	No		Primary Tumor	441	0	441	0	low	1
TCGA.A7.A4SE.01	<60	FEMALE	Infiltrating Ductal Carcinoma		Negative	Negative	Negative	Post	T2	N0	M0	II	YES	Negative	LIVING	NO	No		Primary Tumor	644	0	644	0	low	1
TCGA.A7.A4SF.01	<60	FEMALE	Infiltrating Ductal Carcinoma		Positive	Negative	Positive	Post	T2	N0	M0	II	YES	Positive	LIVING	YES	No		Primary Tumor	545	0	545	0	low	1
TCGA.A7.A56D.01	>=60	FEMALE	Infiltrating Ductal Carcinoma		Positive	Positive	Negative	Post	T2	N0	M0	II	YES	Negative	LIVING	NO	No		Primary Tumor	448	0	448	0	low	1
TCGA.A7.A5ZV.01	>=60	FEMALE	Other		Negative	Negative	Equivocal	Post	T2	N0	M0	II	YES	Negative	LIVING	YES	No		Primary Tumor	368	0	368	0	low	1
TCGA.A7.A5ZW.01	<60	FEMALE	Infiltrating Ductal Carcinoma		Positive	Positive	Negative	Peri	T1	N1	M0	II	YES	Negative	LIVING	YES	No		Primary Tumor	326	0	326	0	high	1
TCGA.A7.A5ZX.01	<60	FEMALE	Infiltrating Lobular Carcinoma		Positive	Positive	Negative	Pre	T2	N3	M0	III	YES		LIVING	YES	No		Primary Tumor	336	0	336	0	low	1
TCGA.A7.A6VV.01	<60	FEMALE	Infiltrating Ductal Carcinoma		Negative	Negative	Negative	Peri	T2	N0	M0	II	YES	Negative	LIVING	NO	No		Primary Tumor	313	0	313	0	low	1
TCGA.A7.A6VW.01	<60	FEMALE	Infiltrating Ductal Carcinoma		Negative	Negative	Negative	Post	T2	N0	M0	II	YES	Close	LIVING	YES	No		Primary Tumor	285	0	285	0	high	1
TCGA.A7.A6VX.01	>=60	FEMALE	Infiltrating Ductal Carcinoma		Positive	Positive	Negative	Post	T2	N0	M0	II	YES	Negative	LIVING	YES	No		Primary Tumor	317	0	317	0	low	1
TCGA.A7.A6VY.01	<60	FEMALE	Infiltrating Ductal Carcinoma		Negative	Negative	Negative	Post	T2	N1	M0	II	YES	Negative	LIVING	YES	No		Primary Tumor	266	0	266	0	high	1
TCGA.A8.A06N.01	>=60	FEMALE	Infiltrating Ductal Carcinoma	LumB	Positive	Negative	Negative	Post	T4	N0	M0	III		Negative	LIVING		No		Primary Tumor					low	1
TCGA.A8.A06O.01	>=60	FEMALE	Infiltrating Ductal Carcinoma	LumB	Positive	Positive	Negative	Post	T1	N0	M0	I		Negative	LIVING	NO	No		Primary Tumor	396	0	396	0	high	1
TCGA.A8.A06P.01	>=60	FEMALE	Infiltrating Ductal Carcinoma	LumA	Positive	Positive	Negative	Post	T1	N2	M0	III		Negative	LIVING	YES	No		Primary Tumor	396	0			low	1
TCGA.A8.A06Q.01	>=60	FEMALE	Infiltrating Ductal Carcinoma	LumB	Positive	Positive	Negative	Post	T3	N2	M0	III		Negative	LIVING		No		Primary Tumor	31	0			low	1
TCGA.A8.A06R.01	>=60	FEMALE	Infiltrating Ductal Carcinoma	LumB	Positive	Negative	Positive	Post	T2	N1	M0	II		Negative	LIVING	YES	No		Primary Tumor	547	0	547	0	low	1
TCGA.A8.A06T.01	>=60	FEMALE	Infiltrating Ductal Carcinoma	LumA	Positive	Positive	Positive	Post	T3	N1	M0	III		Negative	LIVING	NO	No		Primary Tumor	1614	0			high	1
TCGA.A8.A06U.01	>=60	FEMALE	Infiltrating Ductal Carcinoma	LumA	Positive	Positive	Positive	Post	T2	N1	M0	II		Negative	DECEASED	NO	No		Primary Tumor	883	1			low	1
TCGA.A8.A06X.01	>=60	FEMALE	Infiltrating Ductal Carcinoma	LumB	Positive	Negative	Positive	Post	T3	N0	M0	II		Negative	DECEASED	YES	No		Primary Tumor	943	1			low	1
TCGA.A8.A06Y.01	>=60	FEMALE	Infiltrating Ductal Carcinoma	LumA	Positive	Positive	Negative	Post	T2	N0	M0	II		Negative	LIVING	YES	No		Primary Tumor	791	0	791	1	low	1
TCGA.A8.A06Z.01	>=60	FEMALE	Infiltrating Ductal Carcinoma	LumB	Positive	Positive	Negative	Post	T3	N0	M0	II			LIVING		No		Primary Tumor	31	0			low	1
TCGA.A8.A075.01	<60	FEMALE	Infiltrating Ductal Carcinoma	LumB	Positive	Positive	Positive	Pre	T2	N1	M0	II		Negative	LIVING	YES	No		Primary Tumor	518	0	518	0	high	1
TCGA.A8.A076.01	>=60	FEMALE	Infiltrating Ductal Carcinoma	LumB	Positive	Positive	Positive	Post	T2	N0	M0	II		Negative	LIVING	NO	No		Primary Tumor	1642	0	1642	0	high	1
TCGA.A8.A079.01	>=60	FEMALE	Infiltrating Ductal Carcinoma	LumB	Positive	Positive	Negative	Post	T4	N3	M0	III		Negative	LIVING	YES	No		Primary Tumor	274	0			low	1
TCGA.A8.A07B.01	>=60	FEMALE	Infiltrating Ductal Carcinoma	LumA	Positive	Positive	Positive	Post	T2	N0	M0	II		Negative	LIVING	NO	No		Primary Tumor	1308	0			low	1
TCGA.A8.A07C.01	<60	FEMALE	Infiltrating Ductal Carcinoma	Basal	Negative	Negative	Negative	Post	T2	N0	M0	II		Negative	LIVING	YES	No		Primary Tumor	1034	0	1034	0	high	1
TCGA.A8.A07E.01	>=60	FEMALE	Infiltrating Ductal Carcinoma	LumA	Positive	Positive	Negative	Post	T4	N3	MX	X		Negative	LIVING	NO	No		Primary Tumor	608	0	608	0	high	1
TCGA.A8.A07F.01	>=60	FEMALE	Infiltrating Ductal Carcinoma	LumA	Positive	Positive	Negative	Post	T2	N1	M0	II		Negative	LIVING	YES	No		Primary Tumor	577	0	577	0	high	1
TCGA.A8.A07G.01	>=60	FEMALE	Infiltrating Ductal Carcinoma	LumA	Positive	Positive	Negative	Post	T1	N1	M0	II		Negative	LIVING	YES	No		Primary Tumor	577	0	577	0	high	1
TCGA.A8.A07I.01	>=60	FEMALE	Infiltrating Ductal Carcinoma	Her2	Positive	Negative	Positive	Post	T2	N2	M0	III		Negative	LIVING	YES	No		Primary Tumor	426	0	426	0	high	1
TCGA.A8.A07J.01	<60	FEMALE	Infiltrating Ductal Carcinoma	LumA	Positive	Positive	Negative	Pre	T2	N1	M0	II		Negative	LIVING	YES	No		Primary Tumor	365	0	365	0	high	1
TCGA.A8.A07L.01	<60	FEMALE	Infiltrating Ductal Carcinoma	LumB	Positive	Positive	Negative	Post	T3	N1	M0	III		Negative	LIVING	YES	No		Primary Tumor	975	0	975	0	low	1
TCGA.A8.A07O.01	<60	FEMALE	Infiltrating Ductal Carcinoma	Basal	Negative	Negative	Negative	Post	T2	N0	M0	II		Negative	LIVING	YES	No		Primary Tumor	304	0	304	0	low	1
TCGA.A8.A07P.01	>=60	FEMALE	Infiltrating Ductal Carcinoma	LumA	Positive	Positive	Positive	Post	T2	N1	M0	II		Negative	LIVING	YES	No		Primary Tumor	334	0			high	1
TCGA.A8.A07R.01	>=60	FEMALE	Infiltrating Ductal Carcinoma	Basal	Negative	Negative	Positive		T2	N3	M0	III		Positive	LIVING		No		Primary Tumor	273	0			low	1
TCGA.A8.A07S.01	>=60	FEMALE	Other	LumB	Positive	Negative	Negative	Post	T2	N0	M0	II		Positive	LIVING	YES	No		Primary Tumor	243	0	243	0	low	1
TCGA.A8.A07U.01	>=60	FEMALE	Infiltrating Ductal Carcinoma	Basal	Negative	Positive	Negative	Post	T2	N2	M0	III		Negative	LIVING	YES	No		Primary Tumor	760	0	760	0	high	1
TCGA.A8.A07W.01	>=60	FEMALE	Infiltrating Ductal Carcinoma	LumB	Positive	Positive	Negative	Post	T2	NX	M1	IV		Positive	LIVING	NO	No		Primary Tumor	304	0			low	1
TCGA.A8.A07Z.01	>=60	FEMALE	Infiltrating Ductal Carcinoma		Positive	Positive	Negative	Post	T2	N0	M0	II		Negative	LIVING	NO	No		Primary Tumor	1371	0	1371	0	high	1
TCGA.A8.A081.01	>=60	FEMALE	Infiltrating Ductal Carcinoma	LumB	Positive	Positive	Negative	Post	T2	N0	M0	II		Negative	LIVING		No		Primary Tumor					high	1
TCGA.A8.A082.01	<60	FEMALE	Infiltrating Ductal Carcinoma	LumB	Positive	Positive	Negative	Post	T2	N1	M0	II		Negative	LIVING	NO	No		Primary Tumor					low	1
TCGA.A8.A083.01	>=60	FEMALE	Infiltrating Ductal Carcinoma	LumA	Positive	Positive	Negative	Post	T3	N0	M0	II		Negative	LIVING		No		Primary Tumor					low	1
TCGA.A8.A084.01	>=60	FEMALE	Infiltrating Ductal Carcinoma	LumB	Positive	Negative	Negative	Post	T2	N1	M0	II		Positive	LIVING	YES	Yes		Primary Tumor	458	0			low	1
TCGA.A8.A085.01	<60	MALE	Infiltrating Ductal Carcinoma	LumB	Positive	Positive	Negative		T2	N1	M0	II		Negative	LIVING	NO	No		Primary Tumor	1124	0	1124	0	low	1
TCGA.A8.A086.01	<60	FEMALE	Infiltrating Ductal Carcinoma	LumA	Positive	Positive	Negative	Post	T1	N1	M0	II		Negative	LIVING	YES	No		Primary Tumor	396	0	396	0	low	1
TCGA.A8.A08A.01	>=60	FEMALE	Infiltrating Ductal Carcinoma		Positive	Positive	Negative	Post	T1	N0	M0	I		Negative	LIVING		No		Primary Tumor	30	0			high	1
TCGA.A8.A08B.01	<60	FEMALE	Infiltrating Ductal Carcinoma	Her2	Positive	Negative	Positive	Pre	T2	N0	M0	II		Negative	LIVING	YES	No		Primary Tumor	1156	0	1156	0	low	1
TCGA.A8.A08C.01	>=60	FEMALE	Infiltrating Ductal Carcinoma	LumA	Positive	Positive	Positive	Post	T2	N0	M0	II		Negative	LIVING	YES	No		Primary Tumor	881	0	881	0	low	1
TCGA.A8.A08F.01	<60	FEMALE	Infiltrating Ductal Carcinoma	LumB	Positive	Positive	Negative	Post	T2	N3	M0	III		Negative	LIVING	YES	Yes		Primary Tumor	1004	0	1004	0	high	1
TCGA.A8.A08G.01	<60	FEMALE	Infiltrating Ductal Carcinoma	LumB	Positive	Positive	Positive	Pre	T2	N0	M0	II		Negative	LIVING	YES	No		Primary Tumor	607	0	607	0	low	1
TCGA.A8.A08H.01	>=60	FEMALE	Infiltrating Ductal Carcinoma	Normal	Positive	Positive	Positive	Post	T2	N0	M0	II		Negative	LIVING		No		Primary Tumor					high	1
TCGA.A8.A08I.01	<60	FEMALE	Infiltrating Ductal Carcinoma	LumB	Positive	Positive	Negative	Post	T2	N0	M0	II		Negative	LIVING	YES	No		Primary Tumor	365	0	365	0	high	1
TCGA.A8.A08J.01	<60	FEMALE	Infiltrating Ductal Carcinoma	Her2	Positive	Negative	Negative	Post	T4	N3	M1	IV		Positive	DECEASED	NO	No		Primary Tumor	1127	1			low	1
TCGA.A8.A08L.01	>=60	FEMALE	Infiltrating Ductal Carcinoma	Her2	Positive	Negative	Negative	Post	T3	N2	M0	III		Negative	DECEASED	YES	No		Primary Tumor	304	1			high	1
TCGA.A8.A08O.01	<60	FEMALE	Infiltrating Ductal Carcinoma	LumA	Positive	Positive	Negative	Pre	T2	N3	M1	IV		Positive	LIVING	NO	No		Primary Tumor	943	0	762	1	low	1
TCGA.A8.A08P.01	>=60	FEMALE	Infiltrating Ductal Carcinoma	LumB	Positive	Positive	Positive	Post	T2	N2	M0	III		Negative	LIVING	YES	No		Primary Tumor	943	0	943	0	high	1
TCGA.A8.A08R.01	<60	FEMALE	Infiltrating Ductal Carcinoma	Basal	Negative	Negative	Negative	Post	T2	N1	M0	II		Negative	LIVING		No		Primary Tumor	30	0			high	1
TCGA.A8.A08S.01	>=60	FEMALE	Infiltrating Ductal Carcinoma	LumB	Positive	Positive	Positive	Post	T1	N1	M0	II		Negative	LIVING	YES	Yes		Primary Tumor	1004	0	1004	0	low	1
TCGA.A8.A08T.01	>=60	FEMALE	Infiltrating Ductal Carcinoma	LumA	Positive	Positive	Positive	Post	T2	N1	M1	IV		Positive	DECEASED	NO	No		Primary Tumor	3409	1	2557	1	high	1
TCGA.A8.A08X.01	<60	FEMALE	Infiltrating Ductal Carcinoma	Her2	Negative	Negative	Positive	Pre	T4	N3	M0	III		Negative	LIVING	YES	No		Primary Tumor	1308	0	366	1	high	1
TCGA.A8.A08Z.01	>=60	FEMALE	Infiltrating Ductal Carcinoma	LumA	Positive	Positive	Negative	Post	T4	N3	M0			Negative	LIVING		No		Primary Tumor	1217	0			high	1
TCGA.A8.A090.01	>=60	FEMALE	Infiltrating Ductal Carcinoma	LumA	Positive	Positive	Positive	Post	T2	N0	M0	II		Negative	LIVING		No		Primary Tumor					high	1
TCGA.A8.A091.01	>=60	FEMALE	Infiltrating Ductal Carcinoma	LumA	Positive	Negative	Negative	Post	T2	N0	M0	II		Negative	LIVING	YES	No		Primary Tumor	1004	0	243	1	high	1
TCGA.A8.A092.01	<60	FEMALE	Infiltrating Ductal Carcinoma	LumB	Positive	Positive	Negative	Pre	T2	N2	M0	III		Negative	LIVING	YES	No		Primary Tumor	942	0	942	0	low	1
TCGA.A8.A093.01	>=60	FEMALE	Infiltrating Ductal Carcinoma	LumA	Positive	Positive	Negative	Post	T2	N0	M0	II		Negative	LIVING	YES	No		Primary Tumor	546	0	546	0	low	1
TCGA.A8.A094.01	>=60	FEMALE	Infiltrating Ductal Carcinoma	Her2	Positive	Negative	Negative	Post	T2	N0	M0	II		Negative	LIVING		No		Primary Tumor					high	1
TCGA.A8.A095.01	<60	FEMALE	Infiltrating Ductal Carcinoma	LumB	Positive	Positive	Negative	Pre	T1	N0	M0	I		Negative	LIVING	YES	No		Primary Tumor	1277	0	1277	0	high	1
TCGA.A8.A096.01	>=60	FEMALE	Infiltrating Ductal Carcinoma	LumB	Positive	Positive	Negative	Post	T2	N0	M0	II		Negative	LIVING		No		Primary Tumor					high	1
TCGA.A8.A097.01	>=60	FEMALE	Infiltrating Ductal Carcinoma	LumA	Positive	Positive	Positive	Post	T2	N1	M0	II		Negative	LIVING	YES	No		Primary Tumor	365	0	365	0	high	1
TCGA.A8.A099.01	>=60	FEMALE	Infiltrating Ductal Carcinoma	LumA	Positive	Positive	Positive	Post	T4	N3	MX	X			LIVING	YES	No		Primary Tumor	304	0	304	0	high	1
TCGA.A8.A09A.01	<60	FEMALE	Infiltrating Ductal Carcinoma	LumA	Positive	Positive	Negative	Pre	T2	NX	M0	X		Positive	LIVING	YES	No		Primary Tumor	304	0			high	1
TCGA.A8.A09B.01	<60	FEMALE	Infiltrating Ductal Carcinoma	LumA	Positive	Positive	Negative	Post	T4	N1	M0	III		Negative	LIVING	YES	No		Primary Tumor	365	0			low	1
TCGA.A8.A09C.01	>=60	FEMALE	Infiltrating Ductal Carcinoma	LumB	Positive	Positive	Negative	Post	T2	N0	MX	X			LIVING		No		Primary Tumor	31	0			low	1
TCGA.A8.A09D.01	<60	FEMALE	Infiltrating Ductal Carcinoma	LumA	Positive	Positive	Negative	Post	T2	N1	M0	II		Negative	LIVING	YES	No		Primary Tumor	1522	0	1522	0	high	1
TCGA.A8.A09E.01	>=60	FEMALE	Infiltrating Ductal Carcinoma		Positive	Positive	Positive	Post	T4	N1	M0	III		Positive	LIVING	YES	Yes		Primary Tumor	1492	0	1492	0	low	1
TCGA.A8.A09G.01	>=60	FEMALE	Infiltrating Ductal Carcinoma	Her2	Positive	Negative	Positive	Post	T3	N3	M0	III		Negative	LIVING		No		Primary Tumor					high	1
TCGA.A8.A09I.01	>=60	FEMALE	Infiltrating Ductal Carcinoma	LumB	Positive	Positive	Positive	Post	T2	N0	M0	II		Negative	LIVING	NO	No		Primary Tumor	1371	0	1371	0	low	1
TCGA.A8.A09K.01	>=60	FEMALE	Infiltrating Ductal Carcinoma	LumA	Positive	Positive	Negative	Post	T1	N1	M0	II		Negative	LIVING	NO	Yes		Primary Tumor	912	0	912	0	high	1
TCGA.A8.A09M.01	>=60	FEMALE	Infiltrating Ductal Carcinoma	LumB	Positive	Positive	Negative	Post	T2	N3	M0	III		Negative	LIVING	YES	No		Primary Tumor	1006	0	1006	0	high	1
TCGA.A8.A09N.01	<60	FEMALE	Infiltrating Ductal Carcinoma	LumB	Positive	Positive	Positive	Post	T2	N3	M0	III		Negative	LIVING		No		Primary Tumor	31	0			high	1
TCGA.A8.A09Q.01	>=60	FEMALE	Infiltrating Ductal Carcinoma	LumB	Positive	Positive	Negative	Post	T4	N2	M0	III		Positive	LIVING	NO	No		Primary Tumor	761	0			high	1
TCGA.A8.A09R.01	>=60	FEMALE	Infiltrating Ductal Carcinoma	LumB	Positive	Positive	Negative	Post	T2	N1	M0	II		Negative	LIVING	YES	No		Primary Tumor	273	0	273	0	high	1
TCGA.A8.A09T.01	>=60	FEMALE	Infiltrating Lobular Carcinoma	LumA	Positive	Positive	Negative	Post	T1	N0	MX	X		Negative	LIVING	YES	No		Primary Tumor	579	0	579	0	low	1
TCGA.A8.A09V.01	<60	FEMALE	Infiltrating Lobular Carcinoma	LumA	Positive	Positive	Negative	Pre	T2	N0	M0	II		Negative	LIVING	YES	No		Primary Tumor	457	0	457	0	low	1
TCGA.A8.A09W.01	>=60	FEMALE	Infiltrating Lobular Carcinoma	LumB	Positive	Positive	Negative	Post	T2	N3	M0	III			LIVING		No		Primary Tumor	30	0			high	1
TCGA.A8.A09X.01	>=60	FEMALE	Infiltrating Lobular Carcinoma	Her2	Negative	Negative	Negative	Post	T2	N3	M0	III			DECEASED		No		Primary Tumor	426	1			high	1
TCGA.A8.A09Z.01	>=60	FEMALE	Infiltrating Lobular Carcinoma		Positive	Negative	Negative	Post	T3	N0	M0	II		Positive	LIVING		No		Primary Tumor					high	1
TCGA.A8.A0A1.01	>=60	FEMALE	Infiltrating Lobular Carcinoma	LumA	Positive	Positive	Negative	Post	T2	N0	M0	II		Negative	LIVING		No		Primary Tumor	365	0			high	1
TCGA.A8.A0A2.01	>=60	FEMALE	Infiltrating Lobular Carcinoma	LumA	Positive	Positive	Negative	Post	T2	N0	M0	II		Negative	LIVING		No		Primary Tumor	579	0			high	1
TCGA.A8.A0A4.01	>=60	FEMALE	Infiltrating Lobular Carcinoma	LumA	Positive	Positive	Negative	Post	T2	N0	M0	II		Negative	LIVING	NO	No		Primary Tumor	396	0	396	0	high	1
TCGA.A8.A0A6.01	>=60	FEMALE	Infiltrating Lobular Carcinoma	LumA	Positive	Positive	Negative	Post	T2	N3	M0	III		Negative	LIVING	YES	No		Primary Tumor	640	0	640	0	high	1
TCGA.A8.A0A7.01	<60	FEMALE	Infiltrating Lobular Carcinoma	Her2	Negative	Negative	Positive	Post	T2	N1	M0	II		Negative	LIVING		No		Primary Tumor	30	0			high	1
TCGA.A8.A0A9.01	>=60	FEMALE	Infiltrating Ductal Carcinoma	LumA	Positive	Positive	Negative	Post	T2	N0	M0	II		Negative	LIVING	YES	No		Primary Tumor	822	0	822	0	low	1
TCGA.A8.A0AB.01	<60	FEMALE	Infiltrating Lobular Carcinoma	LumA	Positive	Positive	Positive	Post	T2	N0	M0	II		Negative	LIVING	NO	No		Primary Tumor	518	0	518	0	low	1
TCGA.A8.A0AD.01	>=60	FEMALE	Other	LumA	Positive	Positive	Negative	Post	T1	N0	M0	I		Negative	LIVING	NO	No		Primary Tumor	1157	0	1157	0	low	1
TCGA.AC.A23C.01	>=60	FEMALE	Infiltrating Ductal Carcinoma	LumA	Positive	Positive	Positive	Post	T2	N1	MX	II	YES	Negative	LIVING	NO	No		Primary Tumor	585	0	585	0	high	1
TCGA.AC.A23E.01	<60	FEMALE	Infiltrating Ductal Carcinoma	LumA	Positive	Positive			T2	N1	MX	II	YES	Negative	LIVING	YES	No		Primary Tumor	698	0	698	0	low	1
TCGA.AC.A23G.01	>=60	FEMALE	Infiltrating Lobular Carcinoma	LumA	Positive	Positive	Positive	Post	T1	N1	MX	II	YES	Negative	LIVING	NO	No		Primary Tumor	2248	0	2248	0	high	1
TCGA.AC.A23H.01	>=60	FEMALE	Infiltrating Ductal Carcinoma	Her2	Positive	Negative	Positive	Post	T2	NX	M0	II	NO	Negative	DECEASED	NO	No		Primary Tumor	174	1	174	0	low	1
TCGA.AC.A2B8.01	>=60	FEMALE	Infiltrating Lobular Carcinoma	LumA	Positive	Positive	Negative	Post	T3	N0	M0	II	YES	Negative	LIVING	YES	No		Primary Tumor	677	0	654	1	high	1
TCGA.AC.A2BK.01	>=60	FEMALE	Infiltrating Ductal Carcinoma	Basal	Negative	Negative	Negative	Post	T2	N2	MX	III	YES	Negative	LIVING	YES	No		Primary Tumor	2222	0	2222	0	low	1
TCGA.AC.A2BM.01	<60	FEMALE	Infiltrating Ductal Carcinoma	LumB	Positive	Positive			T2	N1	MX	II	YES	Negative	LIVING	NO	No		Primary Tumor	3022	0	3022	0	high	1
TCGA.AC.A2FB.01	>=60	FEMALE	Infiltrating Lobular Carcinoma	LumA	Positive	Positive	Positive		T2	N0	MX	II	YES	Negative	LIVING	NO	No		Primary Tumor	1234	0	1234	0	high	1
TCGA.AC.A2FE.01	>=60	FEMALE	Infiltrating Lobular Carcinoma		Positive	Positive		Post	T3	N3	MX	III	YES	Negative	DECEASED	YES	No		Primary Tumor	2636	1	2496	1	high	1
TCGA.AC.A2FF.01	<60	FEMALE	Infiltrating Lobular Carcinoma	LumA	Positive	Positive			T2	N1	MX	II	YES	Negative	LIVING	YES	No		Primary Tumor	2759	0	2759	0	high	1
TCGA.AC.A2FG.01	>=60	FEMALE	Infiltrating Lobular Carcinoma	LumA	Positive	Negative		Post	T2	N1	MX	II	YES	Negative	LIVING	NO	No		Primary Tumor	1853	0	1853	0	high	1
TCGA.AC.A2FK.01	<60	FEMALE	Infiltrating Lobular Carcinoma	Normal	Positive	Positive			T2	N3	M0	III	YES	Negative	LIVING	YES	No		Primary Tumor	2650	0	2650	0	high	1
TCGA.AC.A2FM.01	>=60	FEMALE	Infiltrating Lobular Carcinoma					Post	T2	N1	M0	II	YES	Negative	DECEASED	NO	No		Primary Tumor	792	1	780	1	low	1
TCGA.AC.A2FO.01	>=60	FEMALE	Infiltrating Lobular Carcinoma	LumA	Positive	Negative	Negative	Post	T2	N1	MX	II	YES	Negative	LIVING	NO	No		Primary Tumor	2255	0	2255	0	high	1
TCGA.AC.A2QH.01	<60	FEMALE	Other	Basal	Negative	Negative	Negative	Post	T3	N0	MX	II	YES	Negative	LIVING	YES	No		Primary Tumor	1005	0	1005	0	low	1
TCGA.AC.A2QI.01	>=60	FEMALE	Infiltrating Lobular Carcinoma		Positive	Negative	Negative	Post	T3	N1	MX	III	YES	Negative	LIVING	YES	No		Primary Tumor	588	0	588	0	high	1
TCGA.AC.A2QJ.01	<60	FEMALE	Other		Negative	Negative	Negative	Peri	T4	N0	M0	III	YES	Negative	DECEASED	YES	No		Primary Tumor	446	1	237	1	high	1
TCGA.AC.A3BB.01	<60	FEMALE	Infiltrating Lobular Carcinoma		Positive	Positive	Negative		T3	N2	MX	III		Negative	LIVING	YES	No		Primary Tumor	987	0	987	0	high	1
TCGA.AC.A3EH.01	>=60	FEMALE	Infiltrating Lobular Carcinoma		Positive	Negative	Negative	Post	T3	N3	M0	III	YES	Negative	DECEASED	NO	No		Primary Tumor	197	1	197	0	low	1
TCGA.AC.A3HN.01	>=60	FEMALE	Infiltrating Lobular Carcinoma	LumA	Positive	Positive	Negative	Post	T2	N1	MX	II	YES	Negative	LIVING	NO	No		Primary Tumor	496	0	496	0	high	1
TCGA.AC.A3OD.01	>=60	FEMALE	Infiltrating Lobular Carcinoma	LumA	Positive	Positive	Negative	Post	T2	N1	MX	II	YES	Negative	LIVING	YES	No		Primary Tumor	451	0	451	0	high	1
TCGA.AC.A3QP.01	>=60	FEMALE	Infiltrating Lobular Carcinoma		Positive	Positive	Equivocal	Post	T2	N1	MX	II	YES	Negative	LIVING	YES	No		Primary Tumor	675	0	675	0	high	1
TCGA.AC.A3QQ.01	<60	FEMALE	Infiltrating Lobular Carcinoma		Positive	Positive	Positive	Peri	T1	N0	MX	I	YES	Close	LIVING	NO	No		Primary Tumor	734	0	734	0	high	1
TCGA.AC.A3TM.01	<60	FEMALE	Infiltrating Lobular Carcinoma		Positive	Positive	Equivocal	Peri	T3	N1	M0	III	YES	Negative	LIVING	YES	No		Primary Tumor	762	0	762	0	high	1
TCGA.AC.A3TN.01	>=60	FEMALE	Infiltrating Lobular Carcinoma		Positive	Positive	Positive	Post	T3	N0	MX	II	YES	Negative	LIVING	YES	No		Primary Tumor	456	0	456	0	low	1
TCGA.AC.A3W5.01	>=60	FEMALE	Infiltrating Lobular Carcinoma		Positive	Positive			T2	N0	MX	II	YES	Close	LIVING	YES	No		Primary Tumor	504	0	504	0	high	1
TCGA.AC.A3W6.01	>=60	FEMALE	Infiltrating Lobular Carcinoma		Positive	Positive	Negative	Post	T3	N1	MX	III	YES	Negative	LIVING	NO	No		Primary Tumor	602	0	602	0	high	1
TCGA.AC.A3W7.01	>=60	FEMALE	Infiltrating Lobular Carcinoma		Positive	Negative	Negative	Post	T2	N1	MX	II	YES	Negative	LIVING	NO	No		Primary Tumor	471	0	471	0	low	1
TCGA.AC.A3YI.01	>=60	FEMALE	Infiltrating Lobular Carcinoma		Positive	Positive	Positive	Post	T1	N3	MX	III	YES	Negative	LIVING	YES	No		Primary Tumor	707	0	707	0	high	1
TCGA.AC.A3YJ.01	>=60	FEMALE	Other		Positive	Positive		Post	T2	N0	MX	II	YES	Negative	LIVING	NO	No		Primary Tumor	754	0	754	0	high	1
TCGA.AC.A4ZE.01	>=60	FEMALE	Infiltrating Lobular Carcinoma		Positive	Positive	Positive	Post	T3	N0	M0	II	YES	Negative	LIVING	NO	No		Primary Tumor	890	0	890	0	high	1
TCGA.AC.A5EH.01	>=60	FEMALE	Infiltrating Ductal Carcinoma		Positive	Negative	Negative		T2	N1	MX	II	YES	Negative	LIVING	YES	No		Primary Tumor	511	0	511	0	high	1
TCGA.AC.A5XS.01	>=60	FEMALE	Infiltrating Lobular Carcinoma		Positive	Positive	Negative		T2	N0	MX	II	YES	Negative	LIVING	NO	No		Primary Tumor	588	0	588	0	high	1
TCGA.AC.A5XU.01	>=60	FEMALE	Infiltrating Ductal Carcinoma		Positive	Positive	Negative		T3	N0	MX	II	YES	Negative	LIVING	YES	No		Primary Tumor	455	0	455	0	low	1
TCGA.AC.A62V.01	<60	MALE	Infiltrating Ductal Carcinoma		Positive	Positive			T2	N1	M1	IV	YES	Negative	DECEASED	YES	No		Primary Tumor	348	1	348	0	high	1
TCGA.AC.A62X.01	>=60	FEMALE	Infiltrating Ductal Carcinoma		Positive	Negative		Post	T2	N0	MX	II	YES	Negative	LIVING	NO	No		Primary Tumor	417	0	417	0	low	1
TCGA.AC.A62Y.01	>=60	FEMALE	Infiltrating Lobular Carcinoma		Positive	Positive	Negative	Post	T2	N1	MX	II	YES	Positive	LIVING	YES	No		Primary Tumor	530	0	530	0	high	1
TCGA.AC.A6IV.01	<60	FEMALE	Infiltrating Lobular Carcinoma		Positive	Positive	Equivocal		T2	N1	MX	II	YES	Negative	LIVING	YES	No		Primary Tumor	568	0	568	0	high	1
TCGA.AC.A6IW.01	>=60	FEMALE	Infiltrating Ductal Carcinoma		Negative	Negative	Negative	Post	T2	N0	MX	II	YES	Negative	LIVING	NO	No		Primary Tumor	413	0	413	0	high	1
TCGA.AC.A6IX.01	<60	FEMALE	Infiltrating Lobular Carcinoma		Positive	Positive		Peri	T2	N3	MX	III	YES	Negative	LIVING	YES	No		Primary Tumor	373	0	373	0	high	1
TCGA.AC.A6IX.06	<60	FEMALE	Infiltrating Lobular Carcinoma		Positive	Positive		Peri	T2	N3	MX	III	YES	Negative	LIVING	YES	No		Metastatic	373	0	373	0	high	1
TCGA.AC.A6NO.01	<60	FEMALE	Infiltrating Ductal Carcinoma		Positive	Positive	Negative		T2	N1	MX	II	YES	Negative	LIVING		No		Primary Tumor	51	0	51	0	high	1
TCGA.AC.A7VB.01	<60	FEMALE	Infiltrating Ductal Carcinoma		Positive	Negative			T1	N1	MX	II	YES	Negative	LIVING	YES	No		Primary Tumor	250	0	250	0	low	1
TCGA.AC.A7VC.01	<60	FEMALE	Other		Negative	Negative	Negative	Post	T3	N0	MX	II	YES	Negative	LIVING		No		Primary Tumor	1	0	1	0	high	1
TCGA.AC.A8OP.01	>=60	FEMALE	Infiltrating Ductal Carcinoma		Positive	Positive	Indeterminate	Post	T1	N0	MX	I	YES	Negative	LIVING	NO	No		Primary Tumor	614	0	614	0	high	1
TCGA.AC.A8OQ.01	>=60	FEMALE	Infiltrating Ductal Carcinoma		Negative	Negative	Indeterminate	Post	T2	N1	MX	II	YES	Negative	LIVING		No		Primary Tumor	34	0	34	0	high	1
TCGA.AC.A8OR.01	>=60	FEMALE	Other		Positive	Positive	Negative	Post	T1	N0	MX	I	YES	Negative	LIVING		No		Primary Tumor	40	0	40	0	low	1
TCGA.AC.A8OS.01	>=60	FEMALE	Infiltrating Lobular Carcinoma		Positive	Positive	Positive	Post	T2	N0	MX	II	YES	Negative	LIVING		No		Primary Tumor	70	0	70	0	high	1
TCGA.AN.A03X.01	>=60	FEMALE	Infiltrating Ductal Carcinoma	LumA	Positive	Positive	Positive	Post	T2	N0	M0	II		Negative	LIVING	NO	No		Primary Tumor	10	0			high	1
TCGA.AN.A03Y.01	>=60	FEMALE	Infiltrating Ductal Carcinoma	LumB	Positive	Positive	Negative	Post	T2	N0	M0	II		Negative	LIVING	NO	No		Primary Tumor	10	0			high	1
TCGA.AN.A041.01	<60	FEMALE	Infiltrating Ductal Carcinoma	LumA	Positive	Negative	Positive	Pre	T2	N1	M0	II	YES	Negative	LIVING	NO	No		Primary Tumor	7	0			high	1
TCGA.AN.A046.01	>=60	FEMALE	Infiltrating Ductal Carcinoma	LumA	Positive	Positive	Negative	Post	T2	N0	M0	II		Negative	LIVING	NO	No		Primary Tumor	10	0			high	1
TCGA.AN.A049.01	>=60	FEMALE	Infiltrating Ductal Carcinoma	LumA	Positive	Positive	Negative	Post	T2	N0	M0	II		Positive	LIVING		No		Primary Tumor	19	0			high	1
TCGA.AN.A04A.01	<60	FEMALE	Infiltrating Ductal Carcinoma	LumA	Positive	Positive	Negative	Peri	T2	N2	M0	III		Positive	LIVING		No		Primary Tumor	90	0			high	1
TCGA.AN.A04C.01	<60	FEMALE	Infiltrating Ductal Carcinoma	Her2	Negative	Negative	Positive	Post	T2	N1	M0	II		Positive	LIVING		No		Primary Tumor	54	0			high	1
TCGA.AN.A04D.01	<60	FEMALE	Infiltrating Ductal Carcinoma	Basal	Negative	Negative	Negative	Post	T2	N1	M0	II		Positive	LIVING		No		Primary Tumor	52	0			low	1
TCGA.AN.A0AJ.01	>=60	FEMALE	Infiltrating Ductal Carcinoma	LumB	Positive	Positive	Positive	Post	T3	N0	M0	II		Negative	LIVING	NO	No		Primary Tumor	303	0	303	0	high	1
TCGA.AN.A0AK.01	>=60	FEMALE	Infiltrating Ductal Carcinoma	LumB	Positive	Negative	Positive	Post	T2	N0	M0	II		Negative	LIVING	NO	No		Primary Tumor	224	0	224	0	high	1
TCGA.AN.A0AL.01	<60	FEMALE	Infiltrating Ductal Carcinoma	Basal	Negative	Negative	Negative	Pre	T4	N0	M0	III		Negative	LIVING	NO	No		Primary Tumor	227	0	227	0	high	1
TCGA.AN.A0AM.01	<60	FEMALE	Infiltrating Ductal Carcinoma	LumB	Positive	Negative	Negative	Post	T2	N0	M0	II		Negative	LIVING	NO	No		Primary Tumor	5	0			high	1
TCGA.AN.A0AR.01	<60	FEMALE	Infiltrating Ductal Carcinoma		Negative	Negative	Negative	Pre	T2	N0	M0	II		Negative	LIVING	NO	No		Primary Tumor	10	0			low	1
TCGA.AN.A0AS.01	>=60	FEMALE	Infiltrating Ductal Carcinoma	LumA	Positive	Negative	Negative	Post	T2	N2	M0	III		Negative	LIVING	NO	No		Primary Tumor	10	0			low	1
TCGA.AN.A0AT.01	>=60	FEMALE	Infiltrating Ductal Carcinoma	Basal	Negative	Negative	Negative	Post	T2	N0	M0	II		Negative	LIVING	NO	No		Primary Tumor	10	0			high	1
TCGA.AN.A0FD.01	>=60	FEMALE	Infiltrating Ductal Carcinoma	LumA	Positive	Positive	Positive	Post	T2	N0	M0	II		Negative	LIVING	NO	No		Primary Tumor	196	0			high	1
TCGA.AN.A0FF.01	<60	FEMALE	Infiltrating Ductal Carcinoma	LumB	Positive	Positive	Negative	Pre	T1	N0	M0	I		Negative	LIVING	NO	No		Primary Tumor	172	0	172	0	high	1
TCGA.AN.A0FJ.01	<60	FEMALE	Infiltrating Ductal Carcinoma	Basal	Positive	Negative	Positive	Peri	T2	N2	M1	IV		Negative	LIVING	NO	No		Primary Tumor	242	0			low	1
TCGA.AN.A0FK.01	>=60	FEMALE	Infiltrating Ductal Carcinoma	LumA	Positive	Positive	Positive	Post	T4	N0	M0	III		Negative	LIVING	NO	No		Primary Tumor	213	0			low	1
TCGA.AN.A0FL.01	>=60	FEMALE	Infiltrating Ductal Carcinoma	Basal	Negative	Negative	Positive	Post	T2	N0	M0	II		Negative	LIVING	NO	No		Primary Tumor	231	0			low	1
TCGA.AN.A0FN.01	>=60	FEMALE	Infiltrating Lobular Carcinoma	LumA	Positive	Positive	Positive	Post	T1	N0	M0	I		Negative	LIVING	NO	No		Primary Tumor	218	0			high	1
TCGA.AN.A0FS.01	<60	FEMALE	Infiltrating Lobular Carcinoma	LumA	Positive	Negative	Positive	Peri	T1	N0	M0	I		Negative	LIVING	NO	No		Primary Tumor	210	0			low	1
TCGA.AN.A0FT.01	>=60	FEMALE	Infiltrating Ductal Carcinoma	LumA	Positive	Positive	Positive	Post	T2	N1	M0	II		Negative	LIVING	NO	No		Primary Tumor	214	0			high	1
TCGA.AN.A0FV.01	<60	FEMALE	Infiltrating Ductal Carcinoma	Her2	Negative	Negative	Positive	Post	T2	N0	M0	II		Negative	LIVING	NO	No		Primary Tumor	10	0			low	1
TCGA.AN.A0FW.01	>=60	FEMALE	Infiltrating Ductal Carcinoma	LumA	Positive	Indeterminate	Negative	Post	T2	N2	M0	III		Negative	LIVING	NO	No		Primary Tumor	11	0	11	0	high	1
TCGA.AN.A0FX.01	<60	FEMALE	Infiltrating Ductal Carcinoma	Basal	Negative	Negative	Positive	Post	T2	N0	M0	II		Negative	LIVING	NO	No		Primary Tumor	10	0			high	1
TCGA.AN.A0FY.01	<60	FEMALE	Infiltrating Ductal Carcinoma	LumB	Positive	Positive	Negative	Post	T1	N0	M0	I		Negative	LIVING	NO	No		Primary Tumor	10	0			high	1
TCGA.AN.A0FZ.01	<60	FEMALE	Infiltrating Ductal Carcinoma	LumA	Positive	Negative	Positive	Pre	T2	N2	M0	III		Negative	LIVING	NO	No		Primary Tumor	10	0			low	1
TCGA.AN.A0G0.01	<60	FEMALE	Infiltrating Ductal Carcinoma	Basal	Negative	Negative	Negative	Post	T2	N0	M0	II		Negative	LIVING	YES	No		Primary Tumor	16	0			low	1
TCGA.AN.A0XL.01	>=60	FEMALE	Infiltrating Ductal Carcinoma	LumA	Positive	Positive	Negative	Post	T2	N0	M0	II	YES	Negative	LIVING	NO	No		Primary Tumor	163	0			high	1
TCGA.AN.A0XN.01	>=60	FEMALE	Infiltrating Ductal Carcinoma	LumA	Negative	Positive	Negative	Post	T2	N2	M0	III	YES	Negative	LIVING	NO	No		Primary Tumor	10	0			high	1
TCGA.AN.A0XO.01	<60	FEMALE	Infiltrating Ductal Carcinoma	LumA	Positive	Negative	Negative	Post	T2	N2	M0	III	YES	Negative	LIVING	NO	No		Primary Tumor	375	0			low	1
TCGA.AN.A0XP.01	>=60	FEMALE	Infiltrating Ductal Carcinoma	LumA	Positive	Positive	Positive	Post	T2	N2	M0	III	YES	Negative	LIVING	NO	No		Primary Tumor	9	0			low	1
TCGA.AN.A0XR.01	<60	FEMALE	Infiltrating Ductal Carcinoma	LumB	Positive	Negative	Negative	Post	T2	N2	M0	III	YES	Negative	LIVING	NO	No		Primary Tumor	10	0			low	1
TCGA.AN.A0XS.01	>=60	FEMALE	Infiltrating Ductal Carcinoma	LumA	Negative	Positive	Negative	Post	T2	N2	M0	III	YES	Negative	LIVING	NO	No		Primary Tumor	10	0	10	0	high	1
TCGA.AN.A0XT.01	<60	FEMALE	Infiltrating Ductal Carcinoma	LumA	Positive	Negative	Negative	Post	T2	N2	M0	III	YES	Negative	LIVING	NO	No		Primary Tumor	10	0			low	1
TCGA.AN.A0XU.01	<60	FEMALE	Infiltrating Ductal Carcinoma	Basal	Negative	Negative	Negative	Post	T2	N0	M0	II	YES	Negative	LIVING	NO	No		Primary Tumor	10	0			high	1
TCGA.AN.A0XV.01	>=60	FEMALE	Infiltrating Ductal Carcinoma	LumA	Positive	Positive	Positive	Post	T2	N2	M0	III	YES	Negative	LIVING	NO	No		Primary Tumor	162	0	162	0	high	1
TCGA.AN.A0XW.01	<60	FEMALE	Infiltrating Ductal Carcinoma	LumA	Positive	Positive	Positive	Pre	T2	N2	M0	III	YES	Negative	LIVING	NO	No		Primary Tumor	170	0	170	0	high	1
TCGA.AO.A03L.01	<60	FEMALE	Infiltrating Ductal Carcinoma	LumA	Positive	Positive	Positive	Pre	T3	N2	M0	III		Negative	LIVING	YES	No	YES	Primary Tumor	2442	0	2442	0	high	1
TCGA.AO.A03M.01	<60	FEMALE	Infiltrating Ductal Carcinoma	LumA	Positive	Positive	Negative	Pre	T1	N0	M0	I		Negative	LIVING	NO	No	YES	Primary Tumor	1866	0	1866	0	high	1
TCGA.AO.A03N.01	<60	FEMALE	Infiltrating Ductal Carcinoma	LumB	Positive	Positive	Negative	Post	T2	N1	M0	II		Negative	LIVING	NO	No	YES	Primary Tumor	2031	0	1645	1	low	1
TCGA.AO.A03O.01	>=60	FEMALE	Infiltrating Ductal Carcinoma	LumB	Positive	Positive	Negative	Post	T2	N0	M0	II		Negative	DECEASED	NO	No	YES	Primary Tumor	2483	1			high	1
TCGA.AO.A03P.01	<60	FEMALE	Infiltrating Ductal Carcinoma	LumB	Positive	Positive	Negative	Post	T2	N1	M0	II		Close	DECEASED	YES	No	NO	Primary Tumor	2911	1	1922	1	low	1
TCGA.AO.A03R.01	<60	FEMALE	Infiltrating Ductal Carcinoma	Normal	Positive	Positive	Negative	Post	T2	N1	M0	II		Negative	LIVING	YES	No	YES	Primary Tumor	2091	0	2091	0	high	1
TCGA.AO.A03T.01	<60	FEMALE	Infiltrating Ductal Carcinoma	Normal	Positive	Positive	Negative	Pre	T2	N1	M0	II		Negative	LIVING	NO	No	YES	Primary Tumor	2124	0	2124	0	high	1
TCGA.AO.A03U.01	<60	FEMALE	Other	Normal	Negative	Negative	Negative	Pre	T1	N0	M0	I		Negative	DECEASED	NO	No	YES	Primary Tumor	1793	1	1614	1	high	1
TCGA.AO.A03V.01	<60	FEMALE	Infiltrating Ductal Carcinoma	LumA	Positive	Positive	Negative	Peri	T1	N0	M0	I		Negative	LIVING	NO	No	YES	Primary Tumor	1351	0	1351	0	high	1
TCGA.AO.A0J2.01	<60	FEMALE	Infiltrating Ductal Carcinoma	Her2	Negative	Negative	Equivocal	Pre	T1	N0	M0	I		Negative	LIVING	NO	No	YES	Primary Tumor	997	0	997	0	high	1
TCGA.AO.A0J3.01	>=60	FEMALE	Other	LumB	Positive	Positive	Equivocal	Post	T2	N1	M0	II		Negative	LIVING	YES	No	YES	Primary Tumor	651	0	651	0	low	1
TCGA.AO.A0J4.01	<60	FEMALE	Infiltrating Ductal Carcinoma	Basal	Negative	Negative	Negative	Pre	T1	N0	M0	I		Negative	LIVING	YES	No	YES	Primary Tumor	1587	0	1587	0	high	1
TCGA.AO.A0J5.01	<60	FEMALE	Other	LumA	Positive	Negative	Equivocal	Pre	T4	N1	M1	IV		Close	DECEASED	YES	Yes	YES	Primary Tumor	792	1	792	0	high	1
TCGA.AO.A0J6.01	>=60	FEMALE	Infiltrating Ductal Carcinoma	Basal	Negative	Negative	Negative	Post	T2	N0	M0	II		Negative	LIVING	YES	No	YES	Primary Tumor	1140	0	1140	0	high	1
TCGA.AO.A0J7.01	>=60	FEMALE	Other	LumB	Positive	Positive	Negative	Post	T2	N1	M0	II		Negative	LIVING	YES	No	YES	Primary Tumor	618	0	618	0	low	1
TCGA.AO.A0J8.01	>=60	FEMALE	Infiltrating Lobular Carcinoma	LumA	Positive	Positive	Negative	Post	T2	N0	M0	II		Negative	LIVING	YES	No	YES	Primary Tumor	680	0	680	0	high	1
TCGA.AO.A0J9.01	>=60	FEMALE	Infiltrating Lobular Carcinoma	LumA	Positive	Positive		Post	T2	N3	M0	III		Positive	LIVING	YES	No	YES	Primary Tumor	1613	0	1066	1	high	1
TCGA.AO.A0JA.01	<60	FEMALE	Infiltrating Ductal Carcinoma	LumA	Positive	Positive	Negative	Pre	T2	N3	M0	III		Negative	LIVING	NO	No	YES	Primary Tumor	655	0	143	1	high	1
TCGA.AO.A0JB.01	<60	FEMALE	Infiltrating Ductal Carcinoma		Positive	Positive	Negative	Pre	T3	N1	M0	III		Negative	LIVING	YES	No	YES	Primary Tumor	1542	0	1542	0	high	1
TCGA.AO.A0JC.01	>=60	FEMALE	Infiltrating Ductal Carcinoma	LumA	Positive	Positive	Negative	Post	T2	N0	M0	II		Negative	LIVING	YES	No	YES	Primary Tumor	1547	0	1547	0	high	1
TCGA.AO.A0JD.01	<60	FEMALE	Infiltrating Ductal Carcinoma	LumB	Positive	Positive	Negative	Post	T3	N1	M0	III		Negative	LIVING	YES	No	YES	Primary Tumor	2190	0	2190	0	high	1
TCGA.AO.A0JE.01	<60	FEMALE	Infiltrating Ductal Carcinoma	Her2	Negative	Negative	Positive	Post	T2	N2	M0	III		Positive	LIVING	YES	No	YES	Primary Tumor	2335	0	2335	0	high	1
TCGA.AO.A0JF.01	>=60	FEMALE	Infiltrating Ductal Carcinoma	LumA	Positive	Positive	Negative	Post	T1	N1	M0	II		Negative	LIVING	YES	No	YES	Primary Tumor	1980	0	1980	0	high	1
TCGA.AO.A0JG.01	<60	FEMALE	Other	LumA	Positive	Positive	Negative	Post	T2	N2	M0	III		Close	LIVING	YES	No	YES	Primary Tumor	798	0	798	0	high	1
TCGA.AO.A0JI.01	<60	FEMALE	Infiltrating Ductal Carcinoma	LumA	Positive	Negative	Negative	Post	T1	N1	M0	II		Negative	LIVING	NO	No	YES	Primary Tumor	1528	0	1528	0	high	1
TCGA.AO.A0JJ.01	<60	FEMALE	Infiltrating Lobular Carcinoma	LumA	Positive	Positive	Negative	Post	T2	N1	M0	II		Negative	LIVING	YES	No	YES	Primary Tumor	1887	0	1887	0	high	1
TCGA.AO.A0JL.01	<60	FEMALE	Infiltrating Ductal Carcinoma	Basal	Negative	Negative	Negative	Post	T2	N2	M0	III		Negative	LIVING	YES	No	YES	Primary Tumor	1683	0	1683	0	low	1
TCGA.AO.A0JM.01	<60	FEMALE	Infiltrating Ductal Carcinoma	LumB	Positive	Positive	Positive	Pre	T2	N1	M0	II		Negative	LIVING	YES	No	YES	Primary Tumor	2184	0	2184	0	high	1
TCGA.AO.A124.01	<60	FEMALE	Other	Basal	Negative	Negative	Negative	Pre	T2	N0	M0	II		Negative	LIVING	NO	No	YES	Primary Tumor	3506	0	3506	0	low	1
TCGA.AO.A125.01	>=60	FEMALE	Other	LumA	Positive	Positive	Negative	Post	T2	N0	M0	II		Negative	LIVING	NO	No	YES	Primary Tumor	3456	0	3456	0	low	1
TCGA.AO.A126.01	<60	FEMALE	Infiltrating Ductal Carcinoma	LumA	Positive	Positive	Negative	Pre	T2	N0	M0	II		Negative	LIVING	YES	No	YES	Primary Tumor	3307	0	267	1	high	1
TCGA.AO.A128.01	>=60	FEMALE	Infiltrating Ductal Carcinoma	Basal	Negative	Negative	Negative	Post	T2	N0	M0	II		Negative	LIVING	YES	No	YES	Primary Tumor	3248	0	3248	0	high	1
TCGA.AO.A129.01	<60	FEMALE	Infiltrating Ductal Carcinoma	Basal	Negative	Negative	Negative	Pre	T2	N1	M0	II		Negative	LIVING	YES	No	YES	Primary Tumor	3286	0	3286	0	high	1
TCGA.AO.A12A.01	<60	FEMALE	Infiltrating Ductal Carcinoma	LumA	Positive	Positive	Negative	Pre	T2	N0	M0	II		Close	LIVING	NO	No	YES	Primary Tumor	3112	0	3112	0	high	1
TCGA.AO.A12B.01	>=60	FEMALE	Infiltrating Ductal Carcinoma	LumA	Positive	Positive	Negative	Post	T2	N0	M0	II		Negative	LIVING	NO	No	YES	Primary Tumor	2989	0	2989	0	low	1
TCGA.AO.A12C.01	<60	FEMALE	Infiltrating Ductal Carcinoma	LumA	Positive	Positive	Positive	Pre	T2	N1	M0	II		Positive	LIVING	YES	No	YES	Primary Tumor	2372	0	2372	0	low	1
TCGA.AO.A12D.01	<60	FEMALE	Infiltrating Ductal Carcinoma	Her2	Negative	Negative	Positive	Pre	T1	N1	M0	II		Negative	LIVING	YES	No	YES	Primary Tumor	2515	0	2515	0	high	1
TCGA.AO.A12E.01	<60	FEMALE	Infiltrating Lobular Carcinoma	LumA	Positive	Positive	Negative	Pre	T3	N0	M0	II		Negative	LIVING	YES	No	YES	Primary Tumor	2142	0	2142	0	high	1
TCGA.AO.A12F.01	<60	FEMALE	Infiltrating Ductal Carcinoma	Basal	Negative	Negative	Negative	Pre	T2	N0	M0	II		Negative	LIVING	YES	No	YES	Primary Tumor	1842	0	1842	0	high	1
TCGA.AO.A12G.01	>=60	FEMALE	Other	LumA	Positive	Positive	Positive	Post	T2	N0	M0	II		Negative	LIVING	NO	No	YES	Primary Tumor	1639	0	1639	0	high	1
TCGA.AO.A12H.01	>=60	FEMALE	Other	LumA	Positive	Positive	Negative	Pre	T2	N0	M0	II		Negative	LIVING	NO	No	YES	Primary Tumor	1234	0	1234	0	low	1
TCGA.AO.A1KO.01	<60	FEMALE	Infiltrating Lobular Carcinoma	Normal	Positive	Positive	Negative	Pre	T3	N0	M0	II	YES	Negative	LIVING	NO	No	YES	Primary Tumor	622	0	622	0	high	1
TCGA.AO.A1KP.01	>=60	FEMALE	Infiltrating Ductal Carcinoma	LumB	Positive	Positive	Negative	Post	T1	N1	M0	II	YES	Negative	LIVING	NO	No	YES	Primary Tumor	2953	0	2953	0	low	1
TCGA.AO.A1KQ.01	>=60	MALE	Infiltrating Ductal Carcinoma	LumB	Positive	Positive	Negative		T4	N1	M0	III	YES	Negative	LIVING	NO	No	YES	Primary Tumor	1882	0	1882	0	high	1
TCGA.AO.A1KR.01	<60	FEMALE	Infiltrating Ductal Carcinoma	Basal	Negative	Negative	Negative	Pre	T2	N0	M0	II	YES	Negative	LIVING	NO	No	YES	Primary Tumor	2513	0	2513	0	high	1
TCGA.AO.A1KS.01	>=60	FEMALE	Infiltrating Lobular Carcinoma	LumB	Positive	Positive	Equivocal	Post	T2	N0	M0	II	YES	Negative	LIVING	YES	No	YES	Primary Tumor	350	0	350	0	high	1
TCGA.AO.A1KT.01	>=60	FEMALE	Infiltrating Ductal Carcinoma	LumB	Positive	Positive	Equivocal	Post	T1	N1	M0	II	YES	Negative	LIVING	YES	No	YES	Primary Tumor	541	0			low	1
TCGA.AQ.A04H.01	>=60	FEMALE	Infiltrating Ductal Carcinoma	LumB	Positive	Positive	Indeterminate	Post	T2	N2	MX	III		Negative	LIVING	YES	No	YES	Primary Tumor	754	0	754	0	high	1
TCGA.AQ.A04J.01	<60	FEMALE	Infiltrating Ductal Carcinoma	Basal	Negative	Negative	Negative	Pre	T2	N0	M0	II		Negative	LIVING	NO	No	YES	Primary Tumor	819	0	819	0	high	1
TCGA.AQ.A04L.01	<60	FEMALE	Infiltrating Ductal Carcinoma	LumA	Positive	Negative	Positive	Peri	T2	N0	MX	II		Negative	LIVING	NO	No	YES	Primary Tumor	3957	0	3957	0	low	1
TCGA.AQ.A0Y5.01	>=60	FEMALE	Infiltrating Ductal Carcinoma	LumA	Positive	Positive	Positive	Post	T2	N2	MX	III	YES	Negative	DECEASED	NO	Yes	YES	Primary Tumor	172	1			low	1
TCGA.AQ.A1H2.01	>=60	FEMALE	Infiltrating Ductal Carcinoma	LumA	Positive	Positive	Indeterminate	Post	T2	N2	MX	III	YES	Negative	LIVING	YES	No	YES	Primary Tumor	475	0	475	0	low	1
TCGA.AQ.A1H3.01	<60	FEMALE	Infiltrating Ductal Carcinoma	LumA	Positive	Positive	Negative	Pre	T2	N3	MX	III	YES	Negative	LIVING	YES	No	YES	Primary Tumor	989	0	989	0	high	1
TCGA.AQ.A54N.01	<60	FEMALE	Infiltrating Ductal Carcinoma		Negative	Negative	Equivocal	Post	T2	N0	M0	II	YES	Negative	LIVING	NO	No		Primary Tumor	78	0	78	0	low	1
TCGA.AQ.A54O.01	<60	MALE	Infiltrating Ductal Carcinoma		Positive	Positive	Negative		T2	N0	M0	II	YES	Negative	LIVING	NO	No		Primary Tumor	1001	0	1001	0	high	1
TCGA.AQ.A7U7.01	<60	FEMALE	Infiltrating Lobular Carcinoma		Positive	Positive	Negative	Post	T2	N2	M0	III	YES	Negative	DECEASED	YES	No		Primary Tumor	584	1	584	0	high	1
TCGA.AR.A0TP.01	<60	FEMALE	Infiltrating Ductal Carcinoma	Basal	Positive	Negative	Negative	Pre	T2	N0	M0	II		Negative	LIVING	YES	No	YES	Primary Tumor	4275	0	4275	0	low	1
TCGA.AR.A0TQ.01	<60	FEMALE	Infiltrating Ductal Carcinoma	LumB	Positive	Negative	Equivocal	Pre	T3	N1	M0	III		Negative	LIVING	YES	No	YES	Primary Tumor	2991	0	2991	0	high	1
TCGA.AR.A0TR.01	>=60	FEMALE	Infiltrating Ductal Carcinoma	LumA	Positive	Positive	Equivocal	Post	T2	N1	M0	II		Negative	DECEASED	NO	No	YES	Primary Tumor	160	1	160	0	low	1
TCGA.AR.A0TS.01	<60	FEMALE	Infiltrating Ductal Carcinoma	Basal	Negative	Negative	Negative	Pre	T2	N1	M0	II		Negative	LIVING	YES	No	YES	Primary Tumor	2558	0	2558	0	high	1
TCGA.AR.A0TT.01	<60	FEMALE	Infiltrating Ductal Carcinoma	LumB	Positive	Negative	Negative	Pre	T2	N2	M0	III		Negative	LIVING	YES	No	YES	Primary Tumor	3316	0	3316	0	high	1
TCGA.AR.A0TU.01	<60	FEMALE	Infiltrating Ductal Carcinoma	Basal	Negative	Negative	Negative	Pre	T2	N0	M0	II		Negative	LIVING	NO	No	YES	Primary Tumor	709	0	709	0	high	1
TCGA.AR.A0TV.01	>=60	FEMALE	Infiltrating Ductal Carcinoma	LumB	Positive	Positive	Equivocal	Post	T2	N0	M0	II		Negative	LIVING	NO	No	NO	Primary Tumor	2288	0	2288	0	high	1
TCGA.AR.A0TW.01	<60	FEMALE	Infiltrating Ductal Carcinoma	LumA	Positive	Positive	Equivocal	Pre	T3	N1	M0	III		Negative	LIVING	NO	No	YES	Primary Tumor	3009	0	3009	0	high	1
TCGA.AR.A0TX.01	>=60	FEMALE	Infiltrating Ductal Carcinoma	Her2	Positive	Positive	Positive	Post	T1	N1	M0	II		Negative	LIVING	YES	No		Primary Tumor	1972	0	1972	0	high	1
TCGA.AR.A0TY.01	<60	FEMALE	Infiltrating Ductal Carcinoma	LumB	Positive	Negative	Negative	Post	T2	N0	M0	II		Negative	DECEASED	NO	No	YES	Primary Tumor	1699	1	544	1	low	1
TCGA.AR.A0TZ.01	<60	FEMALE	Infiltrating Ductal Carcinoma	LumA	Positive	Positive	Equivocal	Pre	T2	N2	M1	III		Negative	DECEASED	YES	No	YES	Primary Tumor	3262	1	1313	1	low	1
TCGA.AR.A0U0.01	>=60	FEMALE	Infiltrating Ductal Carcinoma	Basal	Negative	Negative		Post	T2	N1	M0	II		Negative	LIVING	YES	No		Primary Tumor	1988	0	1988	0	high	1
TCGA.AR.A0U1.01	<60	FEMALE	Infiltrating Ductal Carcinoma	Basal	Negative	Negative	Negative	Pre	T2	N1	M0	II		Negative	LIVING	YES	No	YES	Primary Tumor	4052	0	4052	0	high	1
TCGA.AR.A0U2.01	<60	FEMALE	Infiltrating Ductal Carcinoma	LumB	Positive	Positive	Negative	Pre	T2	N2	M0	III		Negative	DECEASED	YES	No	YES	Primary Tumor	2551	1	1609	1	high	1
TCGA.AR.A0U3.01	<60	FEMALE	Infiltrating Ductal Carcinoma	LumA	Positive	Positive	Negative	Post	T2	N1	M0	II		Negative	LIVING	YES	No	YES	Primary Tumor	4080	0	4080	0	low	1
TCGA.AR.A0U4.01	<60	FEMALE	Infiltrating Ductal Carcinoma	Basal	Negative	Negative	Negative	Pre	T2	N0	M0	II		Negative	LIVING	NO	No	YES	Primary Tumor	3261	0	3261	0	high	1
TCGA.AR.A1AH.01	<60	FEMALE	Infiltrating Ductal Carcinoma	Basal	Positive	Negative	Negative	Post	T2	N1	M0	II	YES	Negative	LIVING	NO	No	YES	Primary Tumor	3807	0	3807	0	low	1
TCGA.AR.A1AI.01	<60	FEMALE	Other	Basal	Negative	Negative	Equivocal	Post	T2	N0	M0	II	YES	Negative	LIVING	NO	No	YES	Primary Tumor	3296	0	3296	0	high	1
TCGA.AR.A1AJ.01	>=60	FEMALE	Infiltrating Ductal Carcinoma	Basal	Positive	Negative	Negative	Post	T1	N0	M0	I	YES	Negative	LIVING	YES	No	NO	Primary Tumor	3072	0	3072	0	high	1
TCGA.AR.A1AK.01	>=60	FEMALE	Infiltrating Lobular Carcinoma	LumA	Positive	Positive	Negative	Post	T1	N0	M0	I	YES	Negative	LIVING	NO	No	YES	Primary Tumor	3159	0	3159	0	high	1
TCGA.AR.A1AL.01	>=60	FEMALE	Infiltrating Lobular Carcinoma	LumA	Positive	Positive	Negative	Post	T3	N1	M0	III	YES	Negative	LIVING	YES	No	YES	Primary Tumor	2971	0	2971	0	high	1
TCGA.AR.A1AM.01	<60	FEMALE	Infiltrating Lobular Carcinoma		Positive	Positive	Equivocal	Post	T3	N1	M0	III	YES	Negative	LIVING	NO	No		Primary Tumor	2991	0	2991	0	high	1
TCGA.AR.A1AN.01	<60	FEMALE	Infiltrating Ductal Carcinoma	LumA	Positive	Positive	Negative	Pre	T2	N0	M0	II	YES	Negative	LIVING	YES	No	YES	Primary Tumor	2920	0	2920	0	high	1
TCGA.AR.A1AO.01	<60	FEMALE	Infiltrating Ductal Carcinoma	Normal	Positive	Negative	Negative	Pre	T1	N1	M0	II	YES	Negative	LIVING	YES	No	YES	Primary Tumor	2618	0	2618	0	high	1
TCGA.AR.A1AP.01	>=60	FEMALE	Infiltrating Ductal Carcinoma	LumA	Positive	Positive	Equivocal	Post	T1	N0	M0	I	YES	Positive	LIVING	NO	No	YES	Primary Tumor	2856	0	2856	0	high	1
TCGA.AR.A1AQ.01	<60	FEMALE	Infiltrating Ductal Carcinoma	Basal	Negative	Negative	Equivocal	Post	T2	N0	M0	II	YES	Negative	LIVING	YES	No	YES	Primary Tumor	3021	0	3021	0	high	1
TCGA.AR.A1AR.01	<60	FEMALE	Infiltrating Ductal Carcinoma	Basal	Negative	Negative	Negative	Post	T1	N2	M0	III		Negative	DECEASED	YES	No	YES	Primary Tumor	524	1	387	1	high	1
TCGA.AR.A1AS.01	<60	FEMALE	Infiltrating Ductal Carcinoma	LumA	Positive	Positive	Negative	Post	T2	N1	M0	II	YES	Negative	LIVING	YES	No	NO	Primary Tumor	1150	0	1150	0	low	1
TCGA.AR.A1AT.01	>=60	FEMALE	Infiltrating Lobular Carcinoma		Positive	Positive	Positive	Post	T2	N0	M0	II	YES	Negative	DECEASED	YES	No	YES	Primary Tumor	1272	1	1272	0	high	1
TCGA.AR.A1AU.01	<60	FEMALE	Infiltrating Ductal Carcinoma	LumA	Positive	Positive	Equivocal	Pre	T2	N2	M0	III	YES	Negative	LIVING	YES	No	YES	Primary Tumor	2868	0	2868	0	high	1
TCGA.AR.A1AV.01	>=60	MALE	Infiltrating Ductal Carcinoma	LumA	Positive	Positive	Negative		T2	N1	M0	II	YES	Negative	LIVING	YES	No	YES	Primary Tumor	1864	0	1864	0	low	1
TCGA.AR.A1AW.01	>=60	FEMALE	Infiltrating Ductal Carcinoma	LumB	Positive	Positive	Equivocal	Post	T2	N0	M0	II	YES	Negative	LIVING	YES	No	YES	Primary Tumor	2632	0	2632	0	high	1
TCGA.AR.A1AX.01	>=60	FEMALE	Infiltrating Ductal Carcinoma	LumA	Positive	Positive	Positive	Post	T1	N0	M0	I	YES	Negative	LIVING	YES	No	YES	Primary Tumor	2629	0	2629	0	high	1
TCGA.AR.A1AY.01	>=60	FEMALE	Infiltrating Ductal Carcinoma	Basal	Negative	Negative	Negative	Post	T1	N0	M0	I	YES	Negative	LIVING	YES	No	YES	Primary Tumor	1026	0	1026	0	low	1
TCGA.AR.A24H.01	>=60	FEMALE	Infiltrating Lobular Carcinoma	LumB	Positive	Positive	Negative	Post	T2	N0	M0	II	YES	Negative	LIVING	YES	No	YES	Primary Tumor	4894	0	4894	0	high	1
TCGA.AR.A24K.01	<60	FEMALE	Infiltrating Ductal Carcinoma	LumB	Positive	Positive	Equivocal	Pre	T2	N0	M0	II	YES	Negative	LIVING	YES	No	YES	Primary Tumor	1548	0	1548	0	low	1
TCGA.AR.A24L.01	<60	FEMALE	Infiltrating Ductal Carcinoma	LumA	Positive	Positive	Equivocal	Pre	T2	N1	M0	II	YES	Negative	DECEASED	YES	No	YES	Primary Tumor	2866	1	1414	1	low	1
TCGA.AR.A24M.01	<60	FEMALE	Other	LumA	Positive	Positive	Negative	Pre	T2	N2	M0	III	YES	Negative	LIVING	YES	No	YES	Primary Tumor	3660	0	3660	0	low	1
TCGA.AR.A24N.01	<60	FEMALE	Infiltrating Ductal Carcinoma	LumB	Positive	Positive	Equivocal	Peri	T1	N0	M0	I	YES	Negative	LIVING	NO	No	NO	Primary Tumor	3035	0	3035	0	low	1
TCGA.AR.A24O.01	<60	FEMALE	Other	LumA	Positive	Positive	Negative	Pre	T3	N2	M0	III	YES	Positive	LIVING	YES	No	YES	Primary Tumor	3607	0	2561	1	high	1
TCGA.AR.A24P.01	<60	FEMALE	Infiltrating Ductal Carcinoma	LumA	Positive	Positive	Equivocal	Post	T1	N0	M0	I	YES	Negative	LIVING		No		Primary Tumor	84	0	84	0	high	1
TCGA.AR.A24Q.01	<60	FEMALE	Infiltrating Ductal Carcinoma	Basal	Positive	Negative	Negative	Post	T3	N0	M0	II	YES	Negative	LIVING	YES	No	YES	Primary Tumor	3172	0	3172	0	high	1
TCGA.AR.A24R.01	<60	FEMALE	Infiltrating Ductal Carcinoma	LumB	Positive	Positive	Negative	Pre	T1	N2	M0	III	YES	Negative	LIVING	YES	No	YES	Primary Tumor	3430	0	3430	0	high	1
TCGA.AR.A24S.01	>=60	FEMALE	Infiltrating Ductal Carcinoma	LumB	Positive	Positive	Negative	Post	T1	N0	M0	I	YES	Negative	LIVING	YES	No	YES	Primary Tumor	2976	0	2976	0	high	1
TCGA.AR.A24T.01	<60	FEMALE	Infiltrating Lobular Carcinoma	LumA	Positive	Positive	Equivocal	Pre	T3	N3	M0	III	YES	Negative	LIVING	YES	No	YES	Primary Tumor	3202	0	3202	0	high	1
TCGA.AR.A24U.01	<60	FEMALE	Infiltrating Ductal Carcinoma	Her2	Negative	Negative	Positive	Pre	T1	N1	M0	II	YES	Positive	LIVING	YES	No	YES	Primary Tumor	3128	0	3128	0	high	1
TCGA.AR.A24V.01	<60	FEMALE	Infiltrating Ductal Carcinoma	LumA	Positive	Positive	Negative	Peri	T2	N1	M0	II	YES	Negative	LIVING	YES	No	YES	Primary Tumor	3203	0	3203	0	low	1
TCGA.AR.A24W.01	<60	FEMALE	Infiltrating Ductal Carcinoma	LumA	Positive	Positive	Negative	Post	T2	N1	M0	II	YES	Negative	LIVING	NO	No	YES	Primary Tumor	991	0	991	0	high	1
TCGA.AR.A24X.01	<60	FEMALE	Other	LumA	Positive	Positive	Equivocal	Pre	T2	N0	M0	II	YES	Negative	LIVING	NO	No	YES	Primary Tumor	3004	0	3004	0	high	1
TCGA.AR.A24Z.01	<60	FEMALE	Infiltrating Ductal Carcinoma	LumB	Positive	Positive	Negative	Post	T2	N0	M0	II	YES	Negative	LIVING	NO	No	YES	Primary Tumor	3001	0	3001	0	low	1
TCGA.AR.A250.01	<60	FEMALE	Infiltrating Ductal Carcinoma	LumB	Positive	Negative	Equivocal	Post	T2	N0	M0	II	YES	Positive	LIVING	NO	No	YES	Primary Tumor	2707	0	2707	0	high	1
TCGA.AR.A251.01	<60	FEMALE	Infiltrating Ductal Carcinoma	Basal	Positive	Negative	Equivocal	Pre	T2	N2	M0	III	YES	Positive	LIVING	YES	No	YES	Primary Tumor	3030	0	3030	0	high	1
TCGA.AR.A252.01	<60	FEMALE	Infiltrating Ductal Carcinoma	LumA	Positive	Positive	Negative	Pre	T1	N0	M0	I	YES	Negative	LIVING	YES	No	YES	Primary Tumor	2838	0	2838	0	high	1
TCGA.AR.A254.01	<60	FEMALE	Infiltrating Ductal Carcinoma	Her2	Positive	Positive	Positive	Pre	T2	N2	M0	III	YES	Negative	LIVING	YES	No	YES	Primary Tumor	2605	0	2605	0	high	1
TCGA.AR.A255.01	>=60	FEMALE	Infiltrating Ductal Carcinoma	LumA	Positive	Positive	Positive	Post	T1	N0	M0	I	YES	Negative	LIVING	YES	No	YES	Primary Tumor	2161	0	2161	0	high	1
TCGA.AR.A256.01	<60	FEMALE	Infiltrating Ductal Carcinoma	Basal	Negative	Negative	Negative	Pre	T2	N0	M0	II	YES	Negative	DECEASED	NO	No	YES	Primary Tumor	2854	1	1640	1	low	1
TCGA.AR.A2LE.01	>=60	FEMALE	Infiltrating Lobular Carcinoma	LumA	Positive	Negative		Post	T1	N0	M0	I	YES	Negative	LIVING	YES	No		Primary Tumor	5062	0	5062	0	high	1
TCGA.AR.A2LH.01	<60	FEMALE	Infiltrating Lobular Carcinoma	Normal	Negative	Negative	Equivocal	Post	T3	N3	M0	III	YES	Negative	DECEASED	YES	No		Primary Tumor	616	1	434	1	high	1
TCGA.AR.A2LJ.01	<60	FEMALE	Infiltrating Lobular Carcinoma		Positive	Positive	Positive	Pre	T3	N1	MX	III	YES	Negative	LIVING	YES	No		Primary Tumor	2632	0	2632	0	high	1
TCGA.AR.A2LK.01	>=60	FEMALE	Infiltrating Lobular Carcinoma	LumB	Positive	Positive	Equivocal	Post	T3	N2	M0	III	YES	Positive	DECEASED	YES	No		Primary Tumor	1649	1	1304	1	low	1
TCGA.AR.A2LL.01	>=60	FEMALE	Infiltrating Lobular Carcinoma	LumB	Positive	Positive	Equivocal	Post	T3	N0	M0	II	YES	Negative	LIVING	NO	No		Primary Tumor	2012	0	2012	0	low	1
TCGA.AR.A2LM.01	<60	FEMALE	Infiltrating Lobular Carcinoma	LumA	Positive	Positive		Pre	T1	N1	M0	II	YES	Negative	LIVING	NO	No		Primary Tumor	1935	0	1935	0	high	1
TCGA.AR.A2LN.01	>=60	FEMALE	Infiltrating Lobular Carcinoma	LumA	Positive	Positive	Negative	Post	T2	N0	M0	II	YES	Negative	LIVING	NO	No		Primary Tumor	1161	0	1161	0	high	1
TCGA.AR.A2LO.01	<60	FEMALE	Infiltrating Lobular Carcinoma	LumA	Positive	Positive	Equivocal	Pre	T2	N1	M0	II	YES	Negative	LIVING	YES	No		Primary Tumor	1198	0	1198	0	high	1
TCGA.AR.A2LQ.01	<60	FEMALE	Infiltrating Lobular Carcinoma	Normal	Positive	Positive	Negative	Post	T3	N0	M0	II	YES	Negative	LIVING	YES	No		Primary Tumor	1233	0	1233	0	high	1
TCGA.AR.A2LR.01	<60	FEMALE	Other	Basal	Negative	Negative	Negative	Post	T1	N0	M0	I	YES	Negative	LIVING	NO	No		Primary Tumor	1742	0	1742	0	high	1
TCGA.AR.A5QM.01	>=60	FEMALE	Infiltrating Lobular Carcinoma		Positive	Positive	Equivocal	Post	T2	N0	M0	II	YES		LIVING	YES	No		Primary Tumor	2231	0	2231	0	high	1
TCGA.AR.A5QN.01	>=60	FEMALE	Infiltrating Lobular Carcinoma		Positive	Positive	Positive	Post	T2	N3	M0	III	YES		LIVING	YES	No		Primary Tumor	1013	0	1013	0	high	1
TCGA.AR.A5QP.01	<60	FEMALE	Infiltrating Lobular Carcinoma		Positive	Positive	Equivocal	Post	T2	N1	M0	II	YES		LIVING	YES	No		Primary Tumor	1185	0	1185	0	high	1
TCGA.AR.A5QQ.01	>=60	FEMALE	Other		Negative	Negative	Negative	Post	T3	N1	M0	III	YES		DECEASED	YES	No		Primary Tumor	322	1	301	1	high	1
TCGA.B6.A0I1.01	>=60	FEMALE	Infiltrating Ductal Carcinoma	Basal	Negative	Negative		Post	T2	N0	M0	II	YES	Negative	DECEASED	NO	No		Primary Tumor	2361	1	1120	1	low	1
TCGA.B6.A0I2.01	<60	FEMALE	Infiltrating Ductal Carcinoma	Basal				Inde	T1	N0	M0	I			LIVING	YES	No	YES	Primary Tumor	4361	0	4361	0	high	1
TCGA.B6.A0I5.01	<60	FEMALE	Infiltrating Ductal Carcinoma	LumA	Positive	Positive		Inde	T2	N1	M0	II		Negative	LIVING	NO	No	YES	Primary Tumor	8556	0	8556	0	high	1
TCGA.B6.A0I6.01	<60	FEMALE	Infiltrating Ductal Carcinoma	Basal	Negative	Negative		Inde	T1	N1	M0	II		Negative	DECEASED	NO	No	YES	Primary Tumor	991	1	859	1	low	1
TCGA.B6.A0I8.01	<60	FEMALE	Infiltrating Ductal Carcinoma	LumA				Inde	T1	NX	M0	X			DECEASED	NO	No	YES	Primary Tumor	749	1	746	1	low	1
TCGA.B6.A0I9.01	>=60	FEMALE	Infiltrating Ductal Carcinoma	Her2	Indeterminate	Positive		Inde	T3	NX	M1	IV			DECEASED	YES	No	YES	Primary Tumor	362	1	362	0	high	1
TCGA.B6.A0IA.01	<60	FEMALE	Other	LumA	Positive	Positive		Inde	T2	N0	M0	II		Negative	LIVING	NO	No	YES	Primary Tumor	8391	0	8391	0	low	1
TCGA.B6.A0IB.01	>=60	FEMALE	Infiltrating Ductal Carcinoma	LumB	Positive	Positive		Inde	T3	N3	M1	IV		Negative	DECEASED	NO	No	YES	Primary Tumor	3941	1	2717	1	low	1
TCGA.B6.A0IC.01	>=60	FEMALE	Other	LumA	Positive	Positive		Post	T2	NX	MX	X		Negative	DECEASED	NO	No	NO	Primary Tumor	1542	1	1542	0	low	1
TCGA.B6.A0IE.01	<60	FEMALE	Other	LumA	Negative	Negative		Pre	T3	N1	M0	III		Close	DECEASED	YES	No	YES	Primary Tumor	1993	1	834	1	high	1
TCGA.B6.A0IG.01	<60	FEMALE	Infiltrating Ductal Carcinoma	LumA	Positive	Positive		Inde	T2	N1	M0	II		Negative	DECEASED	YES	No	YES	Primary Tumor	4456	1			high	1
TCGA.B6.A0IH.01	>=60	FEMALE	Infiltrating Lobular Carcinoma	LumA	Positive	Positive		Post	T3	N1	M0	III	YES	Positive	DECEASED	YES	No	YES	Primary Tumor	3418	1			high	1
TCGA.B6.A0IJ.01	<60	FEMALE	Infiltrating Ductal Carcinoma	Basal	Positive	Positive		Inde	T3	N0	M0	II		Negative	LIVING	NO	No	YES	Primary Tumor	7106	0	7106	0	high	1
TCGA.B6.A0IK.01	>=60	FEMALE	Infiltrating Ductal Carcinoma	Her2	Negative	Negative		Inde	T4	N1	M0	III		Positive	DECEASED	NO	No	YES	Primary Tumor	571	1	489	1	high	1
TCGA.B6.A0IM.01	>=60	FEMALE	Other	LumA	Positive	Positive		Post	T3	N0	M0	II		Positive	DECEASED	NO	No	YES	Primary Tumor	3873	1	3873	0	low	1
TCGA.B6.A0IN.01	<60	FEMALE	Other	LumB	Positive	Negative		Inde	T1	NX	MX	X		Positive	DECEASED	NO	No	YES	Primary Tumor	2573	1	1412	1	high	1
TCGA.B6.A0IO.01	>=60	FEMALE	Infiltrating Ductal Carcinoma	LumA	Positive	Indeterminate		Inde	T2	N0	M0	II		Negative	LIVING	NO	No	YES	Primary Tumor	5042	0	5042	0	high	1
TCGA.B6.A0IP.01	>=60	FEMALE	Infiltrating Lobular Carcinoma	LumA	Positive	Positive		Post	T1	N0	M0	I	YES	Negative	DECEASED	NO	No	NO	Primary Tumor	3926	1	3926	0	high	1
TCGA.B6.A0IQ.01	<60	FEMALE	Infiltrating Ductal Carcinoma	Basal	Negative	Negative		Inde	T3	N1	M0	III		Negative	LIVING	YES	No	YES	Primary Tumor	4285	0	4285	0	high	1
TCGA.B6.A0RE.01	>=60	FEMALE	Infiltrating Ductal Carcinoma	Basal	Negative	Negative		Inde	TX	N0	M0	X		Negative	LIVING	YES	No	NO	Primary Tumor	7777	0	7777	0	low	1
TCGA.B6.A0RG.01	<60	FEMALE	Infiltrating Ductal Carcinoma	LumA	Negative	Negative		Inde	T3	N0	M0	II		Negative	LIVING	NO	No	YES	Primary Tumor	2082	0	2082	0	low	1
TCGA.B6.A0RH.01	<60	FEMALE	Infiltrating Ductal Carcinoma	Her2	Positive	Positive		Inde	T2	N0	M0	II	YES	Positive	DECEASED	NO	No	YES	Primary Tumor	6456	1	6456	0	low	1
TCGA.B6.A0RI.01	<60	FEMALE	Infiltrating Ductal Carcinoma	LumA	Positive	Positive		Inde	T4	N1	M0	III		Negative	LIVING	YES	No	YES	Primary Tumor	7126	0	1100	1	low	1
TCGA.B6.A0RL.01	>=60	FEMALE	Infiltrating Ductal Carcinoma	LumB	Positive	Positive			T2	N0	M0	II		Negative	DECEASED	NO	No	YES	Primary Tumor	2469	1	2469	0	low	1
TCGA.B6.A0RM.01	<60	FEMALE	Infiltrating Ductal Carcinoma	LumA	Positive	Positive		Inde	TX	NX	MX	X			DECEASED	NO	No	NO	Primary Tumor	2373	1	2373	0	low	1
TCGA.B6.A0RN.01	>=60	FEMALE	Infiltrating Ductal Carcinoma	LumA	Negative	Negative		Post	T1	N0	M0	I		Negative	LIVING	YES	No	YES	Primary Tumor	8008	0	8008	0	high	1
TCGA.B6.A0RO.01	>=60	FEMALE	Infiltrating Ductal Carcinoma	LumA	Positive	Positive		Post	T4	N1	M0	III		Negative	LIVING	NO	No	YES	Primary Tumor	4929	0	4929	0	high	1
TCGA.B6.A0RP.01	>=60	FEMALE	Other	LumA	Positive	Positive		Post	T2	N1	M0			Positive	DECEASED	NO	No	YES	Primary Tumor	3126	1	2787	1	high	1
TCGA.B6.A0RQ.01	>=60	FEMALE	Infiltrating Lobular Carcinoma	Normal	Positive	Positive		Post	T3	N0	M0	II	YES		DECEASED	NO	No	YES	Primary Tumor	4267	1	4267	0	low	1
TCGA.B6.A0RS.01	<60	FEMALE	Infiltrating Ductal Carcinoma	Her2	Negative	Negative		Inde	T2	N0	M0	II		Negative	DECEASED	NO	No	YES	Primary Tumor	3063	1	2041	1	high	1
TCGA.B6.A0RT.01	<60	FEMALE	Infiltrating Ductal Carcinoma	Basal	Negative	Negative		Inde	T3	N1	M0	III		Close	LIVING	YES	No	YES	Primary Tumor	2721	0	2721	0	high	1
TCGA.B6.A0RU.01	<60	FEMALE	Other	Basal	Negative	Negative		Inde	T1	N0	M0	I		Negative	LIVING	YES	No	YES	Primary Tumor	8605	0	8605	0	high	1
TCGA.B6.A0RV.01	<60	FEMALE	Other	LumA	Positive	Positive		Inde	T3	N2	M0	III		Negative	LIVING	YES	No	YES	Primary Tumor	5156	0	5156	0	high	1
TCGA.B6.A0WS.01	<60	FEMALE	Infiltrating Ductal Carcinoma	LumA	Positive	Positive		Inde	T1	NX	MX	X	NO	Positive	DECEASED	NO	No	NO	Primary Tumor	2965	1	2965	0	high	1
TCGA.B6.A0WT.01	>=60	FEMALE	Infiltrating Ductal Carcinoma	LumA	Positive	Positive		Post	T2	N1	M0	II		Negative	LIVING	NO	No	YES	Primary Tumor	5739	0	3862	1	low	1
TCGA.B6.A0WV.01	>=60	FEMALE	Infiltrating Ductal Carcinoma	LumB	Positive	Positive		Post	T2	N1	M0	II		Negative	DECEASED	NO	No	YES	Primary Tumor	2417	1	2417	0	low	1
TCGA.B6.A0WW.01	<60	FEMALE	Infiltrating Ductal Carcinoma	LumB	Positive	Positive		Inde	T2	N1	MX	X		Negative	DECEASED	YES	No	NO	Primary Tumor	558	1	447	1	low	1
TCGA.B6.A0WX.01	<60	FEMALE	Other	Basal	Negative	Negative		Pre	T3	N1	M0	III		Negative	DECEASED	NO	No	YES	Primary Tumor	639	1	563	1	high	1
TCGA.B6.A0WY.01	<60	FEMALE	Infiltrating Ductal Carcinoma	LumA	Positive	Negative		Pre	T3	N1	M0	III		Negative	DECEASED	YES	No	YES	Primary Tumor	3461	1	2011	1	low	1
TCGA.B6.A0WZ.01	<60	FEMALE	Infiltrating Ductal Carcinoma	LumA	Positive	Positive		Inde	T2	N1	M0	II		Negative	LIVING	YES	No	YES	Primary Tumor	6292	0	5117	1	low	1
TCGA.B6.A0X0.01	<60	FEMALE	Other	LumA	Positive	Positive		Inde	T1	N0	M0	I	YES	Negative	DECEASED	NO	No	YES	Primary Tumor	3945	1	3945	0	low	1
TCGA.B6.A0X1.01	<60	FEMALE	Infiltrating Ductal Carcinoma	Basal	Negative	Negative		Inde	T2	N1	M1	II		Negative	DECEASED	NO	No	YES	Primary Tumor	7455	1	7455	0	low	1
TCGA.B6.A0X4.01	>=60	FEMALE	Infiltrating Ductal Carcinoma	LumA	Positive	Positive		Post	T2	N1	M0	II		Negative	DECEASED	NO	No	YES	Primary Tumor	860	1	716	1	low	1
TCGA.B6.A0X5.01	>=60	FEMALE	Infiltrating Ductal Carcinoma	LumB	Positive	Positive		Post	T2	N1	M0	II		Negative	DECEASED	NO	No	YES	Primary Tumor	2097	1	1343	1	low	1
TCGA.B6.A0X7.01	>=60	FEMALE	Other	LumA	Positive	Positive		Post	T1	NX	MX	X			DECEASED	YES	No	YES	Primary Tumor	1781	1	1104	1	low	1
TCGA.B6.A1KC.01	>=60	FEMALE	Infiltrating Ductal Carcinoma	LumB	Positive	Negative	Negative	Post	T2	N1	M0	II	YES	Negative	LIVING	YES	No	YES	Primary Tumor	1326	0	1326	0	low	1
TCGA.B6.A1KF.01	>=60	FEMALE	Infiltrating Ductal Carcinoma	Basal	Negative	Negative	Equivocal	Post	T2	N1	M0	II	YES	Negative	LIVING	YES	No	YES	Primary Tumor	3088	0	3088	0	low	1
TCGA.B6.A1KI.01	>=60	FEMALE	Infiltrating Ductal Carcinoma	LumA	Positive	Positive	Equivocal	Post	T1	N0	M0	I	YES	Negative	LIVING	YES	No	YES	Primary Tumor	2236	0	2236	0	low	1
TCGA.B6.A1KN.01	<60	FEMALE	Infiltrating Ductal Carcinoma	LumB	Negative	Negative		Post	T4	N1	M0	III	YES	Negative	LIVING	YES	No	YES	Primary Tumor	4233	0	4233	0	high	1
TCGA.B6.A2IU.01	>=60	FEMALE	Infiltrating Lobular Carcinoma	LumA	Positive	Positive		Inde	T2	N0	M0	II	YES	Negative	LIVING	YES	No		Primary Tumor	5176	0	4224	1	low	1
TCGA.B6.A3ZX.01	<60	FEMALE	Other		Negative	Negative	Negative		T3	N1	M1	IV	YES	Close	DECEASED	YES	No		Primary Tumor	1152	1	994	1	high	1
TCGA.B6.A400.01	<60	FEMALE	Infiltrating Ductal Carcinoma		Negative	Negative	Negative		T2	N2	M0	III	YES	Negative	LIVING	YES	No		Primary Tumor	215	0	215	0	high	1
TCGA.B6.A401.01	<60	FEMALE	Infiltrating Ductal Carcinoma		Positive	Positive	Negative		T1	N1	M0	II	YES	Negative	LIVING	NO	No		Primary Tumor	2596	0	2596	0	high	1
TCGA.B6.A402.01	<60	FEMALE	Infiltrating Ductal Carcinoma		Negative	Negative	Negative		T1	N0	M0	I	YES	Negative	LIVING	YES	No		Primary Tumor	2134	0	2330	1	low	1
TCGA.B6.A408.01	<60	FEMALE	Other		Positive	Positive	Equivocal		T2	N3	M0	III	YES	Negative	LIVING	YES	No		Primary Tumor	2072	0	2072	0	high	1
TCGA.B6.A409.01	<60	FEMALE	Infiltrating Ductal Carcinoma		Negative	Negative	Equivocal	Pre	T1	N2	M0	III	YES	Negative	DECEASED	NO	No		Primary Tumor	573	1			high	1
TCGA.B6.A40B.01	>=60	FEMALE	Infiltrating Lobular Carcinoma		Positive	Positive	Negative	Post	T1	N0	M0	I	YES	Negative	LIVING	NO	No		Primary Tumor	3152	0	3152	0	high	1
TCGA.B6.A40C.01	<60	FEMALE	Infiltrating Lobular Carcinoma		Positive	Positive	Negative		T3	N0	M0	II	YES	Negative	LIVING	YES	No		Primary Tumor	2164	0	2164	0	low	1
TCGA.BH.A0AU.01	<60	FEMALE	Infiltrating Ductal Carcinoma	LumB	Positive	Positive	Positive	Pre	T2	N0	M0	II	YES	Negative	LIVING	YES	No		Primary Tumor	1914	0	1914	0	high	1
TCGA.BH.A0AV.01	<60	FEMALE	Infiltrating Ductal Carcinoma	Basal	Negative	Negative			T1	N0	M0	I	YES	Negative	LIVING	YES	No		Primary Tumor	1820	0	1820	0	low	1
TCGA.BH.A0AW.01	<60	FEMALE	Infiltrating Ductal Carcinoma	Her2	Positive	Negative	Positive	Post	T1	N1	M0	II		Negative	LIVING	YES	No	YES	Primary Tumor	622	0	622	0	high	1
TCGA.BH.A0AY.01	>=60	FEMALE	Infiltrating Ductal Carcinoma	LumA	Positive	Positive	Negative	Post	T2	N0	M0	II		Negative	LIVING	NO	No	YES	Primary Tumor	777	0	777	0	high	1
TCGA.BH.A0AZ.01	<60	FEMALE	Infiltrating Ductal Carcinoma	LumA	Positive	Positive	Negative	Pre	T3	N1	M0	III	YES	Negative	LIVING	NO	No		Primary Tumor	1919	0	1919	0	high	1
TCGA.BH.A0B0.01	<60	FEMALE	Infiltrating Ductal Carcinoma	LumA	Positive	Positive	Negative	Peri	T1	N0	M0	I	YES	Negative	LIVING	YES	No		Primary Tumor	2477	0	2477	0	high	1
TCGA.BH.A0B1.01	>=60	FEMALE	Infiltrating Ductal Carcinoma	LumA	Positive	Positive	Negative	Post	T2	N1	M0	II		Negative	LIVING	YES	No	YES	Primary Tumor	1148	0	1148	0	high	1
TCGA.BH.A0B2.01				LumA															Primary Tumor					high	1
TCGA.BH.A0B3.01	<60	FEMALE	Infiltrating Ductal Carcinoma	Basal	Negative	Negative	Negative	Post	T2	N1	M0	II		Negative	LIVING	YES	No	YES	Primary Tumor	1203	0	1203	0	high	1
TCGA.BH.A0B4.01	>=60	MALE	Infiltrating Ductal Carcinoma	LumA	Positive	Positive	Equivocal		T2	N2	M0	III		Negative	LIVING	YES	No	YES	Primary Tumor	1191	0	1191	0	high	1
TCGA.BH.A0B5.01	<60	FEMALE	Infiltrating Lobular Carcinoma	LumA	Positive	Positive	Negative	Pre	T2	N2	M0	III	YES	Positive	LIVING	YES	No		Primary Tumor	2136	0	2136	0	high	1
TCGA.BH.A0B6.01	<60	FEMALE	Infiltrating Ductal Carcinoma		Positive	Positive	Positive		T1	N0	M0	I	YES	Negative	LIVING	YES	Yes		Primary Tumor	2483	0	2483	0	high	1
TCGA.BH.A0B7.01	<60	FEMALE	Infiltrating Ductal Carcinoma	Her2	Positive	Positive	Positive	Pre	T2	N1	M0	II	YES	Negative	LIVING	YES	No		Primary Tumor	2559	0	2559	0	high	1
TCGA.BH.A0B8.01	>=60	FEMALE	Infiltrating Ductal Carcinoma	LumA	Positive	Positive	Equivocal	Post	T1	N0	M0	I		Negative	LIVING	YES	No	YES	Primary Tumor	1569	0	1569	0	low	1
TCGA.BH.A0B9.01	<60	FEMALE	Infiltrating Ductal Carcinoma		Negative	Negative	Negative	Pre	T1	N0	M0	I		Negative	LIVING	YES	No	YES	Primary Tumor	1572	0	1572	0	high	1
TCGA.BH.A0BA.01	<60	FEMALE	Other	LumA	Positive	Positive	Negative	Pre	T3	N3	M0	III		Negative	LIVING	YES	No	YES	Primary Tumor	1132	0	1132	0	high	1
TCGA.BH.A0BC.01	>=60	FEMALE	Infiltrating Ductal Carcinoma	LumA	Positive	Positive	Negative	Post	T2	N3	M0	III		Negative	LIVING	YES	No	YES	Primary Tumor	974	0			high	1
TCGA.BH.A0BD.01	<60	FEMALE	Infiltrating Ductal Carcinoma	LumB	Positive	Positive	Negative	Pre	T1	N1	M0	II		Negative	LIVING	YES	No	YES	Primary Tumor	554	0	554	0	high	1
TCGA.BH.A0BF.01	<60	FEMALE	Infiltrating Ductal Carcinoma	LumB	Positive	Positive	Negative	Post	T2	N1	M0	II	YES	Negative	DECEASED	NO	No		Primary Tumor	1324	1	1324	0	high	1
TCGA.BH.A0BG.01	>=60	FEMALE	Infiltrating Ductal Carcinoma	Basal	Negative	Negative	Negative	Post	T1	N0	M0	I	YES	Negative	LIVING	YES	No		Primary Tumor	1871	0	1871	0	high	1
TCGA.BH.A0BJ.01	<60	FEMALE	Infiltrating Ductal Carcinoma	LumA	Positive	Positive	Negative	Pre	T2	N1	M0	II		Negative	LIVING	YES	No	YES	Primary Tumor	660	0			high	1
TCGA.BH.A0BL.01	<60	FEMALE	Infiltrating Ductal Carcinoma	Basal	Negative	Negative	Negative	Pre	T1	N0	M0	I	YES	Negative	LIVING	NO	No		Primary Tumor	2278	0	2278	0	high	1
TCGA.BH.A0BM.01	<60	FEMALE	Infiltrating Ductal Carcinoma	LumA	Positive	Negative	Negative	Post	T2	N1	M0	II		Negative	LIVING	NO	No	YES	Primary Tumor	1876	0	1876	0	high	1
TCGA.BH.A0BO.01	<60	FEMALE	Infiltrating Ductal Carcinoma	LumA	Positive	Positive	Negative	Pre	T1	N0	M0	I	YES	Negative	LIVING	YES	No		Primary Tumor	2197	0	2197	0	high	1
TCGA.BH.A0BP.01	>=60	FEMALE	Infiltrating Ductal Carcinoma	LumA	Positive	Positive	Negative	Post	T1	N0	M0	I	YES	Negative	DECEASED	YES	No		Primary Tumor	2296	1	2296	0	low	1
TCGA.BH.A0BQ.01	<60	FEMALE	Infiltrating Ductal Carcinoma	LumA	Positive	Positive	Positive	Pre	T1	N0	M0	I	YES	Negative	LIVING	NO	No		Primary Tumor	2255	0	1709	1	high	1
TCGA.BH.A0BR.01	<60	FEMALE	Infiltrating Ductal Carcinoma	LumA	Positive	Positive	Negative	Post	T1	N0	M0	I	YES	Negative	LIVING	YES	No		Primary Tumor	2330	0	2330	0	high	1
TCGA.BH.A0BS.01	<60	FEMALE	Infiltrating Ductal Carcinoma	LumA	Positive	Positive		Post	T3	N1	M0	III	YES	Negative	LIVING	YES	No		Primary Tumor	2612	0	2612	0	low	1
TCGA.BH.A0BT.01	<60	FEMALE	Infiltrating Ductal Carcinoma	LumA	Positive	Positive	Negative		T1	N1	M0	II		Negative	LIVING	YES	No		Primary Tumor	2365	0	2365	0	high	1
TCGA.BH.A0BV.01	>=60	FEMALE	Infiltrating Ductal Carcinoma	LumA	Positive	Positive	Negative	Post	T2	N1	M0	II		Negative	LIVING	NO	No	YES	Primary Tumor	1519	0			high	1
TCGA.BH.A0BW.01	>=60	FEMALE	Infiltrating Ductal Carcinoma	Basal	Negative	Negative		Post	T1	N0	M0	I	YES	Negative	LIVING	YES	No		Primary Tumor	2371	0	2371	0	high	1
TCGA.BH.A0BZ.01	<60	FEMALE	Infiltrating Ductal Carcinoma	LumB	Positive	Positive	Negative	Post	T3	N1	M0	III	YES	Negative	LIVING	YES	No		Primary Tumor	2255	0	2255	0	high	1
TCGA.BH.A0C0.01	>=60	FEMALE	Infiltrating Ductal Carcinoma	LumB	Positive	Positive	Equivocal	Post	T1	N1	M0	II		Negative	LIVING	YES	No	YES	Primary Tumor	1270	0			high	1
TCGA.BH.A0C1.01	>=60	FEMALE	Infiltrating Lobular Carcinoma	LumA	Positive	Positive	Negative	Post	T3	N2	M0	III	YES	Negative	DECEASED	YES	No		Primary Tumor	1411	1	1123	1	high	1
TCGA.BH.A0C3.01	<60	FEMALE	Other	LumB	Positive	Negative	Negative	Pre	T1	N0	M0	I	YES	Negative	LIVING	YES	No		Primary Tumor	2709	0	2674	1	high	1
TCGA.BH.A0C7.01	<60	FEMALE	Infiltrating Ductal Carcinoma	LumB	Positive	Negative		Peri	T2	N1	M0	II	YES	Negative	LIVING	NO	No		Primary Tumor	2767	0	2767	0	high	1
TCGA.BH.A0DD.01	<60	MALE	Infiltrating Ductal Carcinoma	LumB	Positive	Positive	Positive		T2	N1	M0	II	YES	Negative	LIVING	NO	No		Primary Tumor	2486	0	2486	0	low	1
TCGA.BH.A0DE.01	>=60	FEMALE	Infiltrating Ductal Carcinoma	LumA	Positive	Positive	Negative	Post	T2	N0	M0	II	YES	Negative	LIVING	YES	No		Primary Tumor	2372	0	2372	0	high	1
TCGA.BH.A0DG.01	<60	FEMALE	Infiltrating Ductal Carcinoma	LumA	Positive	Negative	Negative	Pre	T2	N0	M0	II	YES	Negative	LIVING	YES	No		Primary Tumor	2041	0	2041	0	high	1
TCGA.BH.A0DH.01	>=60	FEMALE	Infiltrating Ductal Carcinoma	LumA	Positive	Positive	Negative	Post	T2	N1	M0	II		Positive	LIVING	YES	No	YES	Primary Tumor	1156	0			high	1
TCGA.BH.A0DI.01	>=60	FEMALE	Infiltrating Ductal Carcinoma	LumA	Positive	Positive	Negative	Post	T2	N1	M0	II	YES	Negative	LIVING	YES	No		Primary Tumor	912	0	912	0	high	1
TCGA.BH.A0DK.01	<60	FEMALE	Infiltrating Ductal Carcinoma	LumA	Positive	Positive	Negative	Pre	T2	N0	M0	II		Negative	LIVING	NO	No	YES	Primary Tumor	423	0			high	1
TCGA.BH.A0DL.01	>=60	FEMALE	Other	Basal	Positive	Negative	Negative	Post	T2	N0	M0	II	YES	Negative	LIVING	YES	No		Primary Tumor	2381	0	2381	0	high	1
TCGA.BH.A0DO.01	>=60	FEMALE	Infiltrating Ductal Carcinoma	LumA	Positive	Positive	Negative	Post	T1	N0	M0	I	YES	Negative	LIVING	NO	No		Primary Tumor	1644	0	1644	0	high	1
TCGA.BH.A0DP.01	>=60	FEMALE	Infiltrating Lobular Carcinoma	LumA	Positive	Positive	Negative	Post	T3	N0	M0	II		Negative	LIVING	YES	No	YES	Primary Tumor	476	0			high	1
TCGA.BH.A0DQ.01	<60	FEMALE	Infiltrating Ductal Carcinoma	LumA	Positive	Positive	Negative	Pre	T2	N1	M0	II		Negative	LIVING	YES	No	YES	Primary Tumor	98	0			high	1
TCGA.BH.A0DS.01	>=60	FEMALE	Infiltrating Ductal Carcinoma	LumA	Positive	Positive	Negative	Post	T2	N2	M0	III		Negative	LIVING	YES	No	YES	Primary Tumor	78	0			high	1
TCGA.BH.A0DT.01	<60	FEMALE	Infiltrating Ductal Carcinoma	LumA	Positive	Positive	Negative	Pre	T1	N1	M0	II	YES	Negative	LIVING	YES	No		Primary Tumor	2403	0	2403	0	high	1
TCGA.BH.A0DV.01	<60	FEMALE	Infiltrating Ductal Carcinoma	LumA	Positive	Positive	Negative	Peri	T2	N2	M0	III	YES	Negative	LIVING	YES	No		Primary Tumor	2064	0	2064	0	high	1
TCGA.BH.A0DX.01	>=60	FEMALE	Infiltrating Ductal Carcinoma	LumA	Positive	Positive	Negative	Post	T1	N0	M0	I	YES	Negative	LIVING	YES	No		Primary Tumor	2156	0	2156	0	high	1
TCGA.BH.A0DZ.01	<60	FEMALE	Infiltrating Ductal Carcinoma	LumA	Positive	Positive	Positive	Pre	T2	N1	M0	II		Negative	LIVING	NO	No	YES	Primary Tumor	495	0			high	1
TCGA.BH.A0E0.01	<60	FEMALE	Infiltrating Ductal Carcinoma	Basal	Negative	Negative	Negative	Pre	T3	N3	M0	III		Negative	LIVING	YES	No	YES	Primary Tumor	134	0			high	1
TCGA.BH.A0E1.01	<60	FEMALE	Infiltrating Ductal Carcinoma	LumA	Positive	Positive	Equivocal	Peri	T2	N1	M0	II		Negative	LIVING	NO	No	YES	Primary Tumor	477	0			high	1
TCGA.BH.A0E2.01	<60	FEMALE	Infiltrating Ductal Carcinoma	LumA	Positive	Positive	Negative	Pre	T2	N2	M0	III		Negative	LIVING	NO	No	YES	Primary Tumor	435	0			high	1
TCGA.BH.A0E6.01	>=60	FEMALE	Infiltrating Ductal Carcinoma	Basal	Negative	Negative	Equivocal	Post	T1	N0	M0	I		Negative	LIVING	YES	No	YES	Primary Tumor	293	0			high	1
TCGA.BH.A0E7.01	>=60	FEMALE	Infiltrating Ductal Carcinoma	LumA	Positive	Positive	Negative	Post	T2	N1	M0	II		Negative	LIVING	YES	No	YES	Primary Tumor	1363	0			low	1
TCGA.BH.A0E9.01	<60	FEMALE	Infiltrating Lobular Carcinoma	LumA	Positive	Positive	Negative	Post	T2	N1	M0	II	YES	Negative	LIVING	YES	No		Primary Tumor	2489	0	2489	0	high	1
TCGA.BH.A0EA.01	>=60	FEMALE	Infiltrating Ductal Carcinoma	LumA	Positive	Positive	Negative	Post	T1	N1	M0	II	YES	Negative	DECEASED	NO	No		Primary Tumor	991	1	991	0	high	1
TCGA.BH.A0EB.01	>=60	FEMALE	Infiltrating Ductal Carcinoma	LumA	Positive	Positive	Equivocal	Post	T1	N0	M0	I		Negative	LIVING	YES	No	YES	Primary Tumor	745	0			high	1
TCGA.BH.A0EE.01	>=60	FEMALE	Infiltrating Ductal Carcinoma	Her2	Negative	Negative	Positive	Post	T3	N0	M0	II		Negative	LIVING	NO	No	YES	Primary Tumor	943	0			high	1
TCGA.BH.A0EI.01	<60	FEMALE	Infiltrating Ductal Carcinoma	LumA	Positive	Positive	Negative	Peri	T1	N1	M0	II	YES	Negative	LIVING	YES	No		Primary Tumor	1926	0	1926	0	low	1
TCGA.BH.A0GY.01	>=60	FEMALE	Infiltrating Ductal Carcinoma	LumA	Positive	Positive	Negative	Post	T2	N1	M0	II		Negative	LIVING	YES	No	YES	Primary Tumor	923	0			high	1
TCGA.BH.A0GZ.01	>=60	FEMALE	Infiltrating Ductal Carcinoma	LumA	Positive	Positive	Equivocal	Post	T1	N1	M0	II		Negative	LIVING	YES	No	YES	Primary Tumor	328	0			high	1
TCGA.BH.A0H0.01	>=60	FEMALE	Infiltrating Ductal Carcinoma	LumB	Positive	Positive	Negative	Post	T1	N0	M0	I		Negative	LIVING	YES	No	YES	Primary Tumor	461	0			low	1
TCGA.BH.A0H3.01	<60	FEMALE	Infiltrating Ductal Carcinoma	LumA	Positive	Positive		Pre	T1	N0	M0	I	YES	Negative	LIVING	YES	No		Primary Tumor	1928	0	1928	0	high	1
TCGA.BH.A0H5.01	<60	FEMALE	Infiltrating Ductal Carcinoma	LumA	Positive	Positive		Post	T1	N0	M0	I	YES	Negative	LIVING	NO	No		Primary Tumor	1620	0	1620	0	high	1
TCGA.BH.A0H6.01	>=60	FEMALE	Infiltrating Ductal Carcinoma	LumA	Positive	Positive	Negative	Post	T1	NX	M0	I		Negative	LIVING	YES	No	YES	Primary Tumor	747	0			low	1
TCGA.BH.A0H7.01	>=60	FEMALE	Infiltrating Ductal Carcinoma	LumA	Positive	Positive	Negative	Post	T1	N2	M0	III		Negative	LIVING	YES	No	YES	Primary Tumor	702	0			high	1
TCGA.BH.A0H9.01	>=60	FEMALE	Infiltrating Ductal Carcinoma	LumA	Positive	Positive	Equivocal	Post	T2	N0	M0	II		Negative	LIVING	YES	No	YES	Primary Tumor	1247	0			high	1
TCGA.BH.A0HA.01	<60	FEMALE	Infiltrating Ductal Carcinoma	LumA	Positive	Positive		Pre	T1	N0	M0	I	YES	Negative	LIVING	NO	No	NO	Primary Tumor	1611	0	1611	0	high	1
TCGA.BH.A0HB.01	<60	FEMALE	Infiltrating Ductal Carcinoma	LumA	Positive	Positive	Equivocal	Post	T1	N0	M0	I		Negative	LIVING	YES	No	YES	Primary Tumor	806	0			high	1
TCGA.BH.A0HF.01	>=60	FEMALE	Infiltrating Ductal Carcinoma	LumA	Positive	Positive	Negative	Post	T1	N0	M0	I		Negative	LIVING	YES	No	YES	Primary Tumor	727	0			high	1
TCGA.BH.A0HI.01	>=60	FEMALE	Infiltrating Ductal Carcinoma	LumA	Positive	Positive	Negative	Post	T1	N0	M0	I		Negative	LIVING	YES	No	YES	Primary Tumor	620	0			low	1
TCGA.BH.A0HK.01	>=60	FEMALE	Infiltrating Ductal Carcinoma	LumA	Positive	Negative	Negative	Post	T2	N1	M0	II		Negative	LIVING	NO	No	YES	Primary Tumor	178	0			high	1
TCGA.BH.A0HL.01	<60	FEMALE	Infiltrating Ductal Carcinoma		Positive	Positive	Equivocal	Post	T2	N1	M0	II		Negative	LIVING	NO	No	YES	Primary Tumor	72	0			low	1
TCGA.BH.A0HN.01	>=60	FEMALE	Infiltrating Ductal Carcinoma		Positive	Positive	Equivocal	Post	T1	N0	M0	I		Positive	LIVING	NO	No	YES	Primary Tumor	516	0			low	1
TCGA.BH.A0HO.01	<60	FEMALE	Infiltrating Ductal Carcinoma	LumA	Positive	Positive	Negative	Pre	T1	N1	M0	II		Negative	LIVING	YES	No	YES	Primary Tumor	76	0			low	1
TCGA.BH.A0HP.01	>=60	FEMALE	Infiltrating Lobular Carcinoma	LumA	Positive	Negative	Negative	Post	T3	N2	M0	III		Negative	LIVING	YES	No	YES	Primary Tumor	414	0			high	1
TCGA.BH.A0HQ.01	<60	FEMALE	Infiltrating Ductal Carcinoma	LumA	Positive	Positive	Negative	Post	T2	N0	M0	II		Negative	LIVING	YES	No	YES	Primary Tumor	1121	0			low	1
TCGA.BH.A0HU.01	<60	FEMALE	Infiltrating Ductal Carcinoma	LumB	Positive	Positive	Negative	Peri	T1	N0	M0	I		Negative	LIVING	YES	No	YES	Primary Tumor	392	0			high	1
TCGA.BH.A0HW.01	>=60	FEMALE	Infiltrating Ductal Carcinoma	LumB	Positive	Negative	Equivocal	Post	T1	N0	M0	I		Negative	LIVING	YES	No	YES	Primary Tumor	1561	0			low	1
TCGA.BH.A0HX.01	<60	FEMALE	Infiltrating Ductal Carcinoma	LumA	Positive	Positive	Negative	Post	T2	N1	M0	II		Negative	LIVING	NO	No	YES	Primary Tumor	829	0			high	1
TCGA.BH.A0HY.01	>=60	FEMALE	Infiltrating Ductal Carcinoma	LumB	Positive	Negative	Positive	Post	T1	N0	M0	I	YES	Negative	LIVING	NO	No	YES	Primary Tumor	1545	0	1545	0	low	1
TCGA.BH.A0RX.01	<60	FEMALE	Infiltrating Ductal Carcinoma	Basal	Negative	Negative	Negative	Post	T2	N0	M0	II		Negative	LIVING	YES	No	YES	Primary Tumor	170	0			high	1
TCGA.BH.A0W3.01	<60	FEMALE	Infiltrating Ductal Carcinoma	LumB	Positive	Positive	Equivocal	Inde	T1	N1	M0	II			LIVING	YES	No	NO	Primary Tumor	728	0	728	0	low	1
TCGA.BH.A0W4.01	<60	FEMALE	Infiltrating Ductal Carcinoma	LumA	Positive	Positive	Negative		T2	N0	M0	II			LIVING	NO	No	NO	Primary Tumor	759	0	759	0	low	1
TCGA.BH.A0W5.01	>=60	FEMALE	Infiltrating Ductal Carcinoma	LumA	Positive	Positive	Equivocal		T1	N1	M0	II		Negative	LIVING	YES	No	YES	Primary Tumor	1288	0	1288	0	high	1
TCGA.BH.A0W7.01	<60	FEMALE	Infiltrating Ductal Carcinoma	LumA	Positive	Positive	Negative		T1	N0	M0	I		Negative	LIVING	YES	No	YES	Primary Tumor	1363	0	1363	0	high	1
TCGA.BH.A0WA.01	>=60	FEMALE		Basal	Negative	Negative	Negative		T1	N0	M0	I		Negative	LIVING	NO	No	NO	Primary Tumor	701	0	701	0	low	1
TCGA.BH.A18F.01	<60	FEMALE	Infiltrating Ductal Carcinoma	LumA	Positive	Positive	Negative	Peri	T2	N0	M0	II	YES	Negative	LIVING	YES	No		Primary Tumor	1001	0	1001	0	high	1
TCGA.BH.A18G.01	>=60	FEMALE	Infiltrating Ductal Carcinoma	Basal	Negative	Negative	Negative	Post	T1	N0	M0	I	YES	Negative	LIVING	YES	No		Primary Tumor	149	0	149	0	high	1
TCGA.BH.A18H.01	>=60	FEMALE	Infiltrating Ductal Carcinoma	LumA	Positive	Positive	Positive	Post	T1	N0	M0	I	YES	Negative	LIVING	YES	No		Primary Tumor	652	0	652	0	high	1
TCGA.BH.A18I.01	<60	FEMALE	Infiltrating Ductal Carcinoma	LumA	Positive	Positive	Positive	Post	T1	N1	M0	II	YES	Positive	LIVING	NO	No		Primary Tumor	1093	0	1093	0	high	1
TCGA.BH.A18J.01	<60	FEMALE	Infiltrating Ductal Carcinoma	LumA	Positive	Positive	Negative		T4	N2	M1	IV		Negative	DECEASED		No		Primary Tumor	612	1			low	1
TCGA.BH.A18K.01	<60	FEMALE	Infiltrating Ductal Carcinoma	LumA	Positive	Positive	Negative		T1	N0	M0	I	YES	Negative	DECEASED		No		Primary Tumor	2763	1			low	1
TCGA.BH.A18L.01	<60	FEMALE	Infiltrating Ductal Carcinoma	LumB	Positive	Positive	Negative		T3	N1	M0	III	YES	Negative	DECEASED		No		Primary Tumor	811	1			low	1
TCGA.BH.A18M.01	<60	FEMALE	Infiltrating Ductal Carcinoma	LumA	Positive	Positive	Positive		T3	N1	M0	III	YES	Negative	DECEASED		No		Primary Tumor	2207	1			high	1
TCGA.BH.A18N.01	>=60	FEMALE	Infiltrating Ductal Carcinoma	LumA	Positive	Positive	Negative		T2	N1	M0	II	YES	Negative	DECEASED	NO	No		Primary Tumor	1148	1			low	1
TCGA.BH.A18P.01	>=60	FEMALE	Infiltrating Ductal Carcinoma	Her2	Positive	Negative	Positive		T1	N0	M0	I	YES	Negative	DECEASED		No		Primary Tumor	921	1			high	1
TCGA.BH.A18Q.01	<60	FEMALE	Infiltrating Ductal Carcinoma	Basal	Negative	Negative	Positive		T2	N1	M0	II	YES	Negative	DECEASED		No		Primary Tumor	1692	1			high	1
TCGA.BH.A18R.01	<60	FEMALE	Infiltrating Ductal Carcinoma	Her2	Indeterminate	Negative	Positive		T2	N1	M0	II	YES	Negative	DECEASED		No		Primary Tumor	1142	1			high	1
TCGA.BH.A18S.01	>=60	FEMALE	Other	LumA	Positive	Positive	Negative	Post	T1	N0	M0	I	YES	Negative	DECEASED		No		Primary Tumor	2009	1			low	1
TCGA.BH.A18T.01	>=60	FEMALE	Infiltrating Ductal Carcinoma	Basal	Negative	Negative	Positive	Post	T2	N0	M0	II		Negative	DECEASED		No		Primary Tumor	224	1			low	1
TCGA.BH.A18U.01	>=60	FEMALE	Infiltrating Ductal Carcinoma	LumB	Positive	Positive	Positive	Post	T2	N2	M0	III	YES	Negative	DECEASED		No		Primary Tumor	1563	1			low	1
TCGA.BH.A18V.01	<60	FEMALE	Infiltrating Ductal Carcinoma	Basal	Negative	Negative	Negative		T2	N1	M0	II	YES	Negative	DECEASED		No		Primary Tumor	1556	1			high	1
TCGA.BH.A18V.06	<60	FEMALE	Infiltrating Ductal Carcinoma	Basal	Negative	Negative	Negative		T2	N1	M0	II	YES	Negative	DECEASED		No		Metastatic	1556	1			high	1
TCGA.BH.A1EN.01	>=60	FEMALE	Infiltrating Ductal Carcinoma	Her2	Negative	Negative	Positive	Post	T2	NX	M0	II		Negative	DECEASED		No		Primary Tumor	2127	1			low	1
TCGA.BH.A1EO.01	>=60	FEMALE	Other	LumA	Positive	Positive	Negative	Post	T1	N1	M0	II	YES		DECEASED		No		Primary Tumor	2798	1			high	1
TCGA.BH.A1ES.01	<60	FEMALE	Infiltrating Ductal Carcinoma	LumA	Positive	Positive	Negative	Pre	T2	N1	M0	II	YES		DECEASED		No		Primary Tumor	3462	1			low	1
TCGA.BH.A1ES.06	<60	FEMALE	Infiltrating Ductal Carcinoma		Positive	Positive	Negative	Pre	T2	N1	M0	II	YES		DECEASED		No		Metastatic	3462	1			high	1
TCGA.BH.A1ET.01	<60	FEMALE	Infiltrating Ductal Carcinoma	LumA	Positive	Positive	Negative		T1	N0	M0	I	YES		DECEASED		No		Primary Tumor	2520	1			high	1
TCGA.BH.A1EU.01	>=60	FEMALE	Infiltrating Ductal Carcinoma	LumA	Positive	Positive	Negative	Post	T1	N0	M0	I	NO		DECEASED		No		Primary Tumor	1286	1			high	1
TCGA.BH.A1EV.01	<60	FEMALE	Infiltrating Ductal Carcinoma	Her2	Positive	Positive	Positive		T3	N1	M0	III	YES		DECEASED	YES	No		Primary Tumor	365	1	365	0	low	1
TCGA.BH.A1EW.01	<60	FEMALE	Infiltrating Ductal Carcinoma	LumA	Negative	Negative	Negative	Pre	T2	N1	M0	II	YES		DECEASED		No		Primary Tumor	1694	1			high	1
TCGA.BH.A1EX.01	>=60	FEMALE	Infiltrating Ductal Carcinoma	LumA	Positive	Positive	Positive	Post	T2	N1	M0	II	YES		DECEASED		No		Primary Tumor	1508	1			high	1
TCGA.BH.A1EY.01	>=60	FEMALE	Infiltrating Ductal Carcinoma	LumA	Positive	Positive	Negative	Post	T2	N0	M0	II	YES		DECEASED	NO	No		Primary Tumor	538	1	396	1	high	1
TCGA.BH.A1F0.01	>=60	FEMALE	Infiltrating Ductal Carcinoma	Basal	Negative	Indeterminate	Negative	Post	T1	N1	M0	II	YES		DECEASED		No		Primary Tumor	785	1			high	1
TCGA.BH.A1F2.01	<60	FEMALE	Infiltrating Ductal Carcinoma	LumB	Positive	Positive	Positive		T4	N1	M0	III	YES		DECEASED		No		Primary Tumor	959	1			high	1
TCGA.BH.A1F5.01	>=60	FEMALE	Infiltrating Ductal Carcinoma	LumA	Positive	Positive	Negative		T1	N1	M0	II	YES		DECEASED		No		Primary Tumor	2712	1			high	1
TCGA.BH.A1F6.01	<60	FEMALE	Infiltrating Ductal Carcinoma	Basal	Negative	Negative	Negative		T4	N2	MX		YES		DECEASED		No		Primary Tumor	2965	1			high	1
TCGA.BH.A1F8.01	>=60	FEMALE	Infiltrating Ductal Carcinoma	LumB	Positive	Positive	Positive	Post	T4	N2	M0	III	YES		DECEASED		No		Primary Tumor	763	1			low	1
TCGA.BH.A1FB.01	>=60	FEMALE	Infiltrating Ductal Carcinoma	LumA	Positive	Positive	Negative	Post	T2	N1	M0	II	YES		DECEASED		No		Primary Tumor	3669	1			high	1
TCGA.BH.A1FC.01	>=60	FEMALE	Other	Basal	Negative	Negative	Negative	Post	T1	N1	M0	II	YES		DECEASED		No		Primary Tumor	3472	1			high	1
TCGA.BH.A1FD.01	>=60	FEMALE	Infiltrating Ductal Carcinoma	LumB	Positive	Positive	Negative	Post	T1	N0	M0	I	YES		DECEASED		No		Primary Tumor	1009	1			low	1
TCGA.BH.A1FE.01	<60	FEMALE	Infiltrating Ductal Carcinoma	LumA	Positive	Positive			T2	N1	M0	II	YES		DECEASED		No		Primary Tumor	2273	1			high	1
TCGA.BH.A1FE.06	<60	FEMALE	Infiltrating Ductal Carcinoma	Normal	Positive	Positive			T2	N1	M0	II	YES		DECEASED		No		Metastatic	2273	1			low	1
TCGA.BH.A1FG.01	>=60	FEMALE	Infiltrating Ductal Carcinoma	LumA	Positive	Positive	Negative	Post	T1	NX	M0	I			DECEASED		No		Primary Tumor	3736	1			low	1
TCGA.BH.A1FH.01	<60	FEMALE	Infiltrating Ductal Carcinoma	LumA	Positive	Negative			T2	N1	M1	IV	YES		DECEASED		No		Primary Tumor	1034	1			high	1
TCGA.BH.A1FJ.01	>=60	FEMALE	Infiltrating Ductal Carcinoma	LumB	Negative	Positive			T3	N1	M0	III	YES		DECEASED		No		Primary Tumor	1927	1			low	1
TCGA.BH.A1FL.01	>=60	FEMALE	Infiltrating Ductal Carcinoma	LumA	Positive	Positive			T2	N1	M0	II	YES		DECEASED		No		Primary Tumor	1673	1			high	1
TCGA.BH.A1FM.01	<60	FEMALE	Infiltrating Ductal Carcinoma	LumB	Positive	Negative			T2	N2	M0	III	YES		DECEASED		No		Primary Tumor	1388	1			low	1
TCGA.BH.A1FN.01	<60	FEMALE	Infiltrating Ductal Carcinoma	LumB	Positive	Positive			T2	N0	M0	II	YES		DECEASED		No		Primary Tumor	2192	1			low	1
TCGA.BH.A1FR.01	>=60	FEMALE	Other	LumA	Positive	Positive			T4	N1	M0	III	YES		DECEASED		No		Primary Tumor	1642	1			low	1
TCGA.BH.A1FU.01	<60	FEMALE	Infiltrating Ductal Carcinoma	Normal	Negative	Negative			T1	N0	M0	I	YES		DECEASED		No		Primary Tumor	1688	1			high	1
TCGA.BH.A201.01	>=60	FEMALE	Infiltrating Ductal Carcinoma	LumA	Positive	Positive	Negative	Post	T1	N0	M0	I	YES		LIVING	YES	No		Primary Tumor	856	0	856	0	low	1
TCGA.BH.A202.01	>=60	FEMALE	Infiltrating Ductal Carcinoma	LumB	Positive	Positive	Positive	Post	T2	N0	M0	II	YES		LIVING	YES	No		Primary Tumor	795	0	795	0	high	1
TCGA.BH.A203.01	>=60	FEMALE	Infiltrating Ductal Carcinoma	Her2				Post	T2	N1	M0	II	YES		DECEASED		No		Primary Tumor	1174	1			high	1
TCGA.BH.A204.01	>=60	FEMALE	Infiltrating Ductal Carcinoma	LumB				Post	T2	N1	M0	II	YES		DECEASED		No		Primary Tumor	2534	1			low	1
TCGA.BH.A208.01	<60	FEMALE	Infiltrating Ductal Carcinoma	Normal					T2	N1	M0	II	YES		DECEASED		No		Primary Tumor	1759	1			high	1
TCGA.BH.A209.01	>=60	FEMALE	Other	LumB	Positive	Positive		Post	T1	N0	M0	I	YES		DECEASED		No		Primary Tumor	3959	1			high	1
TCGA.BH.A28O.01	<60	FEMALE	Infiltrating Lobular Carcinoma		Positive	Positive	Negative		T3	N3	M0	III	YES	Negative	LIVING	YES	No		Primary Tumor	1120	0	1120	0	high	1
TCGA.BH.A28Q.01	<60	FEMALE	Infiltrating Lobular Carcinoma	LumA	Positive	Positive	Negative	Pre	T2	N1	M0	II	YES		LIVING	NO	No		Primary Tumor	1119	0	1119	0	high	1
TCGA.BH.A2L8.01	<60	FEMALE	Infiltrating Lobular Carcinoma	LumA	Positive	Positive	Negative	Pre	T2	N0	M0	II	YES	Negative	LIVING	NO	No		Primary Tumor	612	0	612	0	high	1
TCGA.BH.A42T.01	>=60	FEMALE	Infiltrating Lobular Carcinoma		Positive	Positive	Positive	Post	T2	N0	M0	II	YES	Negative	DECEASED	NO	No		Primary Tumor	320	1	320	0	low	1
TCGA.BH.A42U.01	>=60	FEMALE	Infiltrating Lobular Carcinoma		Negative	Negative	Negative	Post	T2	N0	M0	II	YES	Negative	LIVING	NO	No		Primary Tumor	3364	0	3364	0	high	1
TCGA.BH.A42V.01	<60	FEMALE	Infiltrating Ductal Carcinoma		Positive	Positive	Negative	Pre	T1	N1	M0	I	YES	Positive	LIVING	YES	No		Primary Tumor	635	0	635	0	high	1
TCGA.BH.A5IZ.01	<60	FEMALE	Infiltrating Ductal Carcinoma		Positive	Negative	Negative	Post	T2	N1	M0	II	YES	Negative	LIVING	YES	No		Primary Tumor	567	0	567	0	low	1
TCGA.BH.A5J0.01	>=60	FEMALE	Infiltrating Ductal Carcinoma		Positive	Positive	Negative	Post	T1	N0	M0	I	YES	Negative	LIVING	NO	No		Primary Tumor	715	0	715	0	high	1
TCGA.BH.A6R8.01	<60	FEMALE	Infiltrating Ductal Carcinoma		Positive	Positive			T2	N0	M0	II	YES	Negative	LIVING	YES	No		Primary Tumor	293	0	293	0	low	1
TCGA.BH.A6R9.01	>=60	FEMALE	Other		Negative	Positive	Negative	Post	T2	N0	M0	II		Negative	LIVING	NO	No		Primary Tumor	160	0	160	0	high	1
TCGA.BH.A8FY.01	>=60	FEMALE	Infiltrating Lobular Carcinoma		Positive	Positive	Negative	Post	T1	N0	M0	I	YES	Negative	DECEASED	NO	No		Primary Tumor	295	1	295	0	low	1
TCGA.BH.A8FZ.01	<60	FEMALE	Infiltrating Lobular Carcinoma		Positive	Positive	Equivocal	Post	T1	N0	M0	I	YES	Negative	LIVING	YES	No		Primary Tumor	574	0	574	0	high	1
TCGA.BH.A8G0.01	<60	FEMALE	Infiltrating Lobular Carcinoma		Positive	Positive	Negative	Peri	T2	N1	M0	II	YES	Negative	LIVING	NO	No		Primary Tumor	662	0	662	0	high	1
TCGA.BH.AB28.01	<60	FEMALE	Infiltrating Lobular Carcinoma		Positive	Positive	Negative		T3	N1	M0	III	YES	Negative	LIVING	NO	No		Primary Tumor	287	0	287	0	high	1
TCGA.C8.A12K.01	>=60	FEMALE	Infiltrating Ductal Carcinoma	Basal				Post	T2	N1	M0	II		Negative	LIVING		No		Primary Tumor					high	1
TCGA.C8.A12L.01	>=60	FEMALE	Infiltrating Ductal Carcinoma	Her2	Negative	Negative	Equivocal	Post	T2	N0	M0	II		Negative	LIVING	NO	No	NO	Primary Tumor	363	0	363	0	low	1
TCGA.C8.A12M.01	>=60	FEMALE	Infiltrating Ductal Carcinoma	LumB	Positive	Negative	Negative	Post	T2	N0	M0	II		Negative	LIVING	NO	No	YES	Primary Tumor	358	0	358	0	high	1
TCGA.C8.A12N.01	<60	FEMALE	Infiltrating Ductal Carcinoma	LumA	Positive	Positive	Negative	Post	T2	N0	M0	II		Negative	LIVING	NO	No	YES	Primary Tumor	358	0	358	0	low	1
TCGA.C8.A12O.01	<60	FEMALE	Infiltrating Ductal Carcinoma	LumA	Positive	Positive	Negative	Pre	T2	N0	M0	II		Negative	LIVING	NO	No	YES	Primary Tumor	385	0	385	0	high	1
TCGA.C8.A12P.01	<60	FEMALE	Infiltrating Ductal Carcinoma	Her2	Negative	Negative	Positive	Post	T2	N1	M0	II		Negative	LIVING	NO	No	NO	Primary Tumor	358	0	358	0	low	1
TCGA.C8.A12Q.01	>=60	FEMALE	Infiltrating Ductal Carcinoma	Her2	Negative	Negative	Positive	Post	T1	N2	M0	III		Negative	DECEASED	NO	No	NO	Primary Tumor	385	1			low	1
TCGA.C8.A12T.01	<60	FEMALE	Infiltrating Ductal Carcinoma	Her2	Positive	Positive	Positive	Pre	T2	N0	M0	II	YES	Negative	LIVING		No		Primary Tumor					low	1
TCGA.C8.A12U.01	<60	FEMALE	Infiltrating Ductal Carcinoma	LumB	Positive	Positive	Negative	Pre	T2	N1	M0	II	YES	Negative	LIVING	NO	No	NO	Primary Tumor	385	0	385	0	high	1
TCGA.C8.A12V.01	<60	FEMALE	Infiltrating Ductal Carcinoma	Basal	Negative	Negative	Negative	Post	T2	N0	M0	II	YES		LIVING	NO	No	YES	Primary Tumor	385	0	385	0	high	1
TCGA.C8.A12W.01	<60	FEMALE	Infiltrating Ductal Carcinoma	LumB	Positive	Positive	Negative	Pre	T4	N1	M0	III	YES	Negative	LIVING	NO	No	YES	Primary Tumor	385	0	385	0	low	1
TCGA.C8.A12X.01	>=60	FEMALE	Other	LumA	Positive	Positive	Negative	Post	T2	N1	M0	II	YES	Negative	LIVING	NO	No	YES	Primary Tumor	385	0	385	0	low	1
TCGA.C8.A12Y.01	<60	FEMALE	Infiltrating Ductal Carcinoma	LumA				Pre	T2	N1	M0	II	YES	Negative	LIVING	YES	No		Primary Tumor	1476	0	1476	0	low	1
TCGA.C8.A12Z.01	<60	FEMALE	Infiltrating Ductal Carcinoma	Her2	Negative	Negative	Positive	Peri	T2	N1	M0	II	YES	Negative	LIVING	NO	No		Primary Tumor	382	0	382	0	low	1
TCGA.C8.A130.01	<60	FEMALE	Infiltrating Ductal Carcinoma	LumB	Positive	Positive	Equivocal	Peri	T3	N2	M0	III	YES	Negative	LIVING	NO	No	YES	Primary Tumor	370	0	370	0	high	1
TCGA.C8.A131.01	>=60	FEMALE	Infiltrating Ductal Carcinoma	Basal	Negative	Negative	Negative	Post	T2	N2	M0	III	YES	Negative	LIVING	NO	No	YES	Primary Tumor	411	0	411	0	high	1
TCGA.C8.A132.01	<60	FEMALE	Infiltrating Ductal Carcinoma	LumA	Positive	Positive		Post	T2	N1	M0	II	YES	Negative	LIVING	NO	No	YES	Primary Tumor	383	0	383	0	high	1
TCGA.C8.A133.01	>=60	FEMALE	Other	LumA	Positive	Positive		Post	T3	N1	M0	III	YES	Negative	LIVING		No		Primary Tumor					low	1
TCGA.C8.A134.01	<60	FEMALE	Infiltrating Ductal Carcinoma	Basal	Negative	Negative	Equivocal	Peri	T2	N0	M0	II		Negative	LIVING	NO	No	YES	Primary Tumor	383	0	383	0	high	1
TCGA.C8.A135.01	>=60	FEMALE	Infiltrating Ductal Carcinoma	Her2	Negative	Negative	Positive	Post	T2	N1	M0	II	YES	Negative	LIVING	NO	No	NO	Primary Tumor	393	0	393	0	high	1
TCGA.C8.A137.01	<60	FEMALE	Infiltrating Ductal Carcinoma	Her2	Negative	Negative	Positive	Pre	T2	N1	M0	II	YES	Negative	LIVING	NO	No	YES	Primary Tumor	379	0	136	1	low	1
TCGA.C8.A138.01	<60	FEMALE	Infiltrating Ductal Carcinoma	Her2	Positive	Negative	Equivocal	Post	T2	N2	M0	III	YES	Negative	LIVING	NO	No	NO	Primary Tumor	380	0	380	0	high	1
TCGA.C8.A1HE.01	<60	FEMALE	Infiltrating Ductal Carcinoma	LumA	Positive	Positive	Equivocal	Post	T2	N0	M0	II	YES	Negative	LIVING	NO	No	YES	Primary Tumor	375	0	375	0	high	1
TCGA.C8.A1HF.01	<60	FEMALE	Infiltrating Ductal Carcinoma	Her2	Negative	Positive	Positive	Pre	T2	N0	M0	II	YES	Negative	LIVING	NO	No	YES	Primary Tumor	332	0	332	0	high	1
TCGA.C8.A1HG.01	<60	FEMALE	Infiltrating Ductal Carcinoma	LumB	Positive	Positive	Negative	Pre	T2	N0	M0	II	NO	Negative	LIVING	NO	No	YES	Primary Tumor	345	0	345	0	high	1
TCGA.C8.A1HI.01	<60	FEMALE	Infiltrating Ductal Carcinoma	LumA	Positive	Positive	Negative	Pre	T2	N2	M0	III	YES	Negative	LIVING	NO	Yes	YES	Primary Tumor	343	0	343	0	high	1
TCGA.C8.A1HJ.01	<60	FEMALE	Infiltrating Ductal Carcinoma	Basal	Negative	Negative	Negative	Peri	T2	N0	M0	II	YES	Negative	LIVING		No		Primary Tumor	5	0			high	1
TCGA.C8.A1HK.01	<60	FEMALE	Infiltrating Ductal Carcinoma	Her2	Negative	Negative	Positive	Peri	T2	N1	M0	II	YES	Negative	LIVING	NO	No	NO	Primary Tumor	366	0	366	0	low	1
TCGA.C8.A1HL.01	<60	FEMALE	Other	LumB	Positive	Negative	Equivocal	Pre	T3	N1	M0	III	YES	Negative	LIVING	NO	No	NO	Primary Tumor	317	0	317	0	high	1
TCGA.C8.A1HM.01	>=60	FEMALE	Infiltrating Ductal Carcinoma	LumB	Positive	Positive	Negative	Post	T2	N0	M0	II	NO	Negative	LIVING	NO	No	YES	Primary Tumor	375	0	375	0	high	1
TCGA.C8.A1HN.01	<60	FEMALE	Infiltrating Ductal Carcinoma	LumB	Positive	Positive	Equivocal	Post	T2	N0	M0	II	NO	Negative	LIVING	NO	No	YES	Primary Tumor	394	0	394	0	low	1
TCGA.C8.A1HO.01	<60	FEMALE	Infiltrating Ductal Carcinoma	LumA	Positive	Positive	Negative	Pre	T3	N3	M0	III	NO	Negative	LIVING	NO	No		Primary Tumor	375	0	375	0	high	1
TCGA.C8.A26V.01	<60	FEMALE	Infiltrating Ductal Carcinoma	LumB	Positive	Positive	Negative	Peri	T3	N2	M0	III	NO	Negative	LIVING	YES	No		Primary Tumor	616	0	616	0	low	1
TCGA.C8.A26W.01	<60	FEMALE	Infiltrating Ductal Carcinoma	LumB	Positive	Positive	Equivocal	Post	T2	N1	M0	II	NO	Negative	LIVING	NO	No		Primary Tumor	381	0	381	0	high	1
TCGA.C8.A26X.01	<60	FEMALE	Infiltrating Ductal Carcinoma	Her2	Negative	Negative	Negative	Post	T1	N1	M0	II	NO	Negative	LIVING	NO	No		Primary Tumor	376	0	376	0	high	1
TCGA.C8.A26Y.01	>=60	FEMALE	Infiltrating Ductal Carcinoma	Her2	Negative	Negative	Negative	Post	T2	N0	M0	II	NO	Negative	LIVING	NO	No		Primary Tumor	394	0	394	0	high	1
TCGA.C8.A26Z.01	<60	FEMALE	Infiltrating Ductal Carcinoma	LumA	Positive	Positive	Negative	Post	T2	N0	M0	II	NO	Negative	LIVING	NO	No	NO	Primary Tumor	470	0	470	0	low	1
TCGA.C8.A273.01	<60	FEMALE	Infiltrating Ductal Carcinoma	LumA	Positive	Positive	Negative	Pre	T2	N1	M0	II	YES	Negative	LIVING	NO	No	YES	Primary Tumor	513	0	513	0	low	1
TCGA.C8.A274.01	>=60	FEMALE	Infiltrating Ductal Carcinoma	LumB	Positive	Positive	Negative	Post	T2	N0	M0	II	NO	Negative	LIVING	NO	No	YES	Primary Tumor	508	0	508	0	low	1
TCGA.C8.A275.01	<60	FEMALE	Infiltrating Ductal Carcinoma	Her2				Post	T1	N1	M0	II	NO	Negative	LIVING		No		Primary Tumor	1	0			high	1
TCGA.C8.A278.01	>=60	FEMALE	Infiltrating Ductal Carcinoma	Her2	Negative	Negative	Positive	Post	T2	N2	M0	III	NO	Negative	LIVING	NO	No	YES	Primary Tumor	297	0	297	0	high	1
TCGA.C8.A27A.01	<60	FEMALE	Infiltrating Ductal Carcinoma	LumB	Positive	Positive	Negative	Peri	T2	N1	M0	II	NO	Negative	LIVING	NO	No		Primary Tumor	747	0	747	0	low	1
TCGA.C8.A27B.01	<60	FEMALE	Infiltrating Ductal Carcinoma	Basal	Negative	Negative	Negative	Peri	T3	N0	M0	II	NO	Negative	LIVING	NO	No		Primary Tumor	439	0	439	0	high	1
TCGA.C8.A3M7.01	>=60	FEMALE	Infiltrating Lobular Carcinoma	LumA	Negative	Negative	Negative	Post	T4	N0	M0	III	YES	Negative	DECEASED	YES	No		Primary Tumor	1034	1	1034	1	high	1
TCGA.C8.A3M8.01	>=60	FEMALE	Infiltrating Lobular Carcinoma	LumB	Positive	Positive	Positive	Post	T1	N0	M0	I	YES	Negative	LIVING	NO	No		Primary Tumor	394	0	394	0	low	1
TCGA.C8.A8HP.01	<60	FEMALE	Other		Negative	Negative	Positive	Post	T2	N2	M0	III	YES	Negative	LIVING	NO	No		Primary Tumor	396	0	396	0	high	1
TCGA.C8.A8HQ.01	<60	FEMALE	Other		Positive	Positive	Negative	Post	T2	N1	M0	II	YES	Negative	LIVING	NO	No		Primary Tumor	380	0	380	0	high	1
TCGA.C8.A8HR.01	<60	FEMALE	Infiltrating Lobular Carcinoma					Peri	T3	N2	M0	III	YES	Negative	LIVING	NO	No		Primary Tumor	408	0	408	0	high	1
TCGA.D8.A13Y.01	<60	FEMALE	Infiltrating Ductal Carcinoma	LumB	Positive	Positive	Negative	Post	T1	N0	M0	I		Negative	LIVING	NO	No	YES	Primary Tumor	1728	0	1728	0	low	1
TCGA.D8.A13Z.01	<60	FEMALE	Infiltrating Ductal Carcinoma	Her2	Negative	Negative	Negative	Post	T2	N2	M0		YES	Negative	LIVING	YES	No	YES	Primary Tumor	635	0	635	0	high	1
TCGA.D8.A140.01	>=60	FEMALE	Infiltrating Ductal Carcinoma	LumA	Positive	Positive	Positive	Post	T2	N1	M0	II	YES	Negative	LIVING	NO	No	YES	Primary Tumor	403	0	403	0	high	1
TCGA.D8.A141.01	<60	FEMALE	Infiltrating Ductal Carcinoma	LumA	Positive	Positive	Negative	Inde	T1	N1	M0		YES	Negative	LIVING	NO	No	YES	Primary Tumor	626	0	626	0	high	1
TCGA.D8.A142.01	>=60	FEMALE	Infiltrating Ductal Carcinoma	Basal	Negative	Negative	Equivocal	Post	T3	N0	M0	II	YES	Negative	LIVING	NO	No	YES	Primary Tumor	425	0	425	0	high	1
TCGA.D8.A143.01	<60	FEMALE	Infiltrating Ductal Carcinoma	Basal	Negative	Negative	Negative	Post	T2	N0	M0	II	YES	Negative	LIVING	NO	No	YES	Primary Tumor	431	0	431	0	high	1
TCGA.D8.A145.01	>=60	FEMALE	Infiltrating Ductal Carcinoma	LumA	Positive	Positive	Equivocal	Post	T1	N1	M0	II	YES	Negative	LIVING	NO	No	YES	Primary Tumor	410	0	410	0	high	1
TCGA.D8.A146.01	<60	FEMALE	Infiltrating Ductal Carcinoma	LumA	Positive	Positive	Negative	Post	T2	N0	MX	II	YES	Negative	LIVING	NO	Yes	YES	Primary Tumor	643	0	643	0	high	1
TCGA.D8.A147.01	<60	FEMALE	Infiltrating Ductal Carcinoma	Basal	Negative	Negative	Negative	Inde	T2	N0	M0		YES	Negative	LIVING	YES	No	YES	Primary Tumor	584	0	584	0	high	1
TCGA.D8.A1J8.01	>=60	FEMALE	Infiltrating Ductal Carcinoma	LumB	Positive	Positive	Negative	Post	T2	N1	M0	II		Negative	LIVING	NO	No	YES	Primary Tumor	431	0	431	0	high	1
TCGA.D8.A1J9.01	<60	FEMALE	Infiltrating Ductal Carcinoma	LumB	Positive	Negative	Positive	Post	T1	N0	M0	I		Negative	LIVING	NO	No	YES	Primary Tumor	532	0	532	0	low	1
TCGA.D8.A1JA.01	>=60	FEMALE	Infiltrating Ductal Carcinoma	Her2	Negative	Negative	Positive	Post	T4	NX	M0		NO	Negative	LIVING	YES	No	YES	Primary Tumor	502	0	431	1	low	1
TCGA.D8.A1JB.01	<60	FEMALE	Infiltrating Ductal Carcinoma	LumA	Positive	Positive	Equivocal	Post	T2	N1	M0	II	YES	Negative	LIVING	YES	No	YES	Primary Tumor	1688	0	1688	0	high	1
TCGA.D8.A1JC.01	<60	FEMALE	Infiltrating Ductal Carcinoma	LumB	Positive	Positive	Negative	Post	T2	N2	M0	III	YES	Negative	LIVING	YES	No	YES	Primary Tumor	480	0	480	0	low	1
TCGA.D8.A1JD.01	<60	FEMALE	Infiltrating Ductal Carcinoma	LumB	Positive	Positive	Negative	Pre	T2	N1	M0	II		Negative	LIVING	YES	No	YES	Primary Tumor	552	0	552	0	low	1
TCGA.D8.A1JE.01	>=60	FEMALE	Infiltrating Ductal Carcinoma	LumB	Positive	Positive	Negative	Post	T1	N1	M0	II	YES	Negative	LIVING	NO	No	YES	Primary Tumor	575	0	575	0	low	1
TCGA.D8.A1JF.01	>=60	FEMALE	Infiltrating Ductal Carcinoma	Her2	Negative	Negative	Negative	Post	T1	N2	M0	III	YES	Negative	LIVING	NO	No	YES	Primary Tumor	366	0	366	0	high	1
TCGA.D8.A1JG.01	>=60	FEMALE	Infiltrating Ductal Carcinoma	Her2	Negative	Negative	Equivocal	Post	T2	N0	M0	II	YES	Negative	LIVING	YES	No	YES	Primary Tumor	1612	0	1612	0	high	1
TCGA.D8.A1JH.01	<60	FEMALE	Infiltrating Ductal Carcinoma	LumA	Positive	Positive	Negative	Post	T1	N0	M0	I	YES	Negative	LIVING	YES	No	YES	Primary Tumor	426	0	426	0	high	1
TCGA.D8.A1JI.01	<60	FEMALE	Infiltrating Ductal Carcinoma	LumB	Positive	Positive	Negative	Post	T1	N1	MX	II	YES	Negative	LIVING	YES	No	YES	Primary Tumor	577	0	577	0	low	1
TCGA.D8.A1JJ.01	<60	FEMALE	Infiltrating Ductal Carcinoma	LumB	Positive	Positive	Negative	Post	T2	N0	M0	II	YES	Negative	LIVING	YES	No	YES	Primary Tumor	611	0	611	0	low	1
TCGA.D8.A1JK.01	>=60	FEMALE	Infiltrating Ductal Carcinoma	Basal	Negative	Positive	Negative	Post	T2	N0	M0	II	YES	Negative	LIVING	NO	No	NO	Primary Tumor	612	0	612	0	high	1
TCGA.D8.A1JL.01	>=60	FEMALE	Infiltrating Ductal Carcinoma	Basal	Negative	Negative	Negative	Post	T2	N0	M0	II	YES	Negative	LIVING	NO	No	YES	Primary Tumor	611	0	611	0	high	1
TCGA.D8.A1JM.01	<60	FEMALE	Infiltrating Ductal Carcinoma	Basal	Positive	Negative	Negative	Post	T2	N1	M0	II	YES	Negative	LIVING	YES	No	YES	Primary Tumor	590	0	590	0	high	1
TCGA.D8.A1JN.01	>=60	FEMALE	Infiltrating Lobular Carcinoma	LumA	Positive	Positive	Indeterminate	Post	T3	N3	MX	III	YES	Negative	LIVING	NO	No	YES	Primary Tumor	620	0	620	0	high	1
TCGA.D8.A1JP.01	>=60	FEMALE	Infiltrating Ductal Carcinoma	LumA	Positive	Positive	Negative	Post	T1	N0	M0	I	YES	Negative	LIVING	NO	No	YES	Primary Tumor	639	0	639	0	high	1
TCGA.D8.A1JS.01	>=60	FEMALE	Other	LumA	Positive	Positive	Negative	Post	T1	N0	M0	I	YES	Negative	LIVING	NO	No	YES	Primary Tumor	371	0	371	0	low	1
TCGA.D8.A1JT.01	>=60	FEMALE	Other	LumB	Positive	Positive	Equivocal	Post	T2	N0	M0	II	YES	Negative	LIVING	NO	No	YES	Primary Tumor	405	0	405	0	low	1
TCGA.D8.A1JU.01	<60	FEMALE	Infiltrating Ductal Carcinoma	LumA	Positive	Positive	Negative	Post	T1	N0	M0	I	YES	Negative	LIVING	NO	No	YES	Primary Tumor	447	0	447	0	high	1
TCGA.D8.A1X5.01	>=60	FEMALE	Infiltrating Ductal Carcinoma	LumB	Positive	Positive	Positive	Post	T2	N3	MX	III	YES	Negative	LIVING	YES	No	YES	Primary Tumor	565	0	565	0	low	1
TCGA.D8.A1X6.01	>=60	FEMALE	Infiltrating Ductal Carcinoma	LumB	Positive	Positive	Negative	Post	T3	N2	MX	III	YES	Negative	LIVING	NO	No	YES	Primary Tumor	541	0	541	0	low	1
TCGA.D8.A1X7.01	<60	FEMALE	Other	LumB	Positive	Positive	Negative	Pre	T2	N0	MX	II	YES	Negative	LIVING	NO	No	YES	Primary Tumor	509	0	509	0	low	1
TCGA.D8.A1X8.01	>=60	FEMALE	Infiltrating Lobular Carcinoma	LumA	Positive	Indeterminate	Negative	Post	T1	N2	M0	III	YES	Negative	LIVING	YES	No	YES	Primary Tumor	783	0	783	0	high	1
TCGA.D8.A1X9.01	>=60	FEMALE	Infiltrating Ductal Carcinoma	LumA	Positive	Positive	Indeterminate	Post	T2	N1	M0	II	YES		LIVING	YES	No	YES	Primary Tumor	727	0	727	0	low	1
TCGA.D8.A1XA.01	>=60	FEMALE	Infiltrating Ductal Carcinoma	LumA	Positive	Positive	Equivocal	Post	T1	N0	M0	I	YES	Negative	LIVING	YES	No	NO	Primary Tumor	839	0	839	0	low	1
TCGA.D8.A1XB.01	>=60	FEMALE	Infiltrating Ductal Carcinoma	LumA	Positive	Positive	Negative	Post	T2	N1	M0	II	YES	Negative	LIVING	YES	No	NO	Primary Tumor	552	0	552	0	low	1
TCGA.D8.A1XC.01	>=60	FEMALE	Other	LumA	Positive	Positive	Negative	Post	T4	N1	M0	III	YES	Negative	DECEASED	NO	No	NO	Primary Tumor	377	1			low	1
TCGA.D8.A1XD.01	<60	FEMALE	Infiltrating Ductal Carcinoma	LumA	Positive	Positive	Negative	Pre	T1	N2	M0	III	YES	Negative	LIVING	YES	No	NO	Primary Tumor	522	0	522	0	low	1
TCGA.D8.A1XF.01	<60	FEMALE	Infiltrating Ductal Carcinoma	LumB	Positive	Positive	Negative	Pre	T2	N0	M0	II	YES		LIVING	NO	No	YES	Primary Tumor	463	0	463	0	low	1
TCGA.D8.A1XG.01	>=60	FEMALE	Infiltrating Ductal Carcinoma	LumA	Positive	Negative	Negative	Post	T4	N1	M0	III	YES	Negative	LIVING	NO	No	NO	Primary Tumor	448	0	448	0	low	1
TCGA.D8.A1XJ.01	>=60	FEMALE	Other	Her2	Positive	Positive	Positive	Post	T3	N1	MX	III	YES	Negative	LIVING	NO	No	YES	Primary Tumor	663	0	663	0	low	1
TCGA.D8.A1XK.01	<60	FEMALE	Infiltrating Ductal Carcinoma	Basal	Negative	Negative	Negative	Post	T2	N1	MX	II	YES	Negative	LIVING	YES	No	YES	Primary Tumor	441	0	441	0	low	1
TCGA.D8.A1XL.01	<60	FEMALE	Infiltrating Ductal Carcinoma	LumB	Positive	Positive	Equivocal	Pre	T2	N1	MX	II	YES	Negative	LIVING	YES	No	YES	Primary Tumor	606	0	606	0	high	1
TCGA.D8.A1XM.01	<60	FEMALE	Infiltrating Ductal Carcinoma	LumA	Positive	Positive	Negative	Post	T1	N0	M0	I	YES	Negative	LIVING	YES	No	NO	Primary Tumor	538	0	538	0	high	1
TCGA.D8.A1XO.01	<60	FEMALE	Infiltrating Lobular Carcinoma	LumA	Positive	Positive	Negative	Post	T2	N1	M0	II	YES	Negative	LIVING	YES	No	YES	Primary Tumor	1682	0	1682	0	high	1
TCGA.D8.A1XQ.01	>=60	FEMALE	Infiltrating Ductal Carcinoma	Basal	Negative	Negative	Negative	Post	T2	N0	M0	II	YES	Negative	LIVING	NO	No	NO	Primary Tumor	499	0	499	0	high	1
TCGA.D8.A1XR.01	<60	FEMALE	Infiltrating Ductal Carcinoma	LumB	Positive	Positive	Negative	Post	T2	N1	M0	II	YES	Negative	LIVING	NO	No	YES	Primary Tumor	482	0	482	0	low	1
TCGA.D8.A1XS.01	<60	MALE	Other	LumB	Positive	Positive	Positive		T2	N3	M0	III	YES	Negative	LIVING	YES	No	YES	Primary Tumor	496	0	496	0	high	1
TCGA.D8.A1XT.01	>=60	FEMALE	Infiltrating Ductal Carcinoma	Her2	Negative	Negative	Positive	Post	T1	N1	M0	II	YES	Negative	LIVING	NO	No	YES	Primary Tumor	506	0	506	0	low	1
TCGA.D8.A1XU.01	<60	FEMALE	Infiltrating Ductal Carcinoma	LumA	Positive	Positive	Negative	Post	T1	N0	M0	I	YES	Negative	LIVING	NO	No	NO	Primary Tumor	395	0	395	0	high	1
TCGA.D8.A1XV.01	>=60	FEMALE	Other	LumA	Positive	Positive	Equivocal	Post	T2	N0	M0	II	YES	Negative	LIVING	NO	No	NO	Primary Tumor	461	0	461	0	low	1
TCGA.D8.A1XW.01	<60	FEMALE	Infiltrating Ductal Carcinoma	Normal	Negative	Positive	Negative	Post	T2	N0	M0	II	YES	Negative	LIVING	NO	No	YES	Primary Tumor	1309	0	1309	0	high	1
TCGA.D8.A1XY.01	>=60	FEMALE	Infiltrating Ductal Carcinoma	LumA	Positive	Positive	Positive	Post	T2	N0	MX	II	YES		LIVING	NO	No	YES	Primary Tumor	503	0	503	0	low	1
TCGA.D8.A1XZ.01	>=60	FEMALE	Infiltrating Ductal Carcinoma	LumB	Positive	Negative	Negative	Post	T1	N2	MX	III	YES	Negative	LIVING	YES	No	YES	Primary Tumor	466	0	466	0	high	1
TCGA.D8.A1Y0.01	>=60	FEMALE	Infiltrating Ductal Carcinoma	LumA	Positive	Positive	Negative	Post	T1	N2	MX	III	YES		LIVING	YES	No	YES	Primary Tumor	472	0	472	0	high	1
TCGA.D8.A1Y1.01	>=60	FEMALE	Infiltrating Ductal Carcinoma	LumB	Positive	Positive	Negative	Post	T3	N1	MX	III	YES		DECEASED	NO	No	YES	Primary Tumor	302	1	302	0	low	1
TCGA.D8.A1Y2.01	>=60	FEMALE	Infiltrating Ductal Carcinoma	LumB	Positive	Positive	Indeterminate	Post	T2	N0	MX	II	YES	Negative	LIVING	NO	No	YES	Primary Tumor	433	0	433	0	high	1
TCGA.D8.A1Y3.01	>=60	FEMALE	Infiltrating Ductal Carcinoma	LumB	Positive	Positive	Indeterminate	Post	T2	N2	MX	III	YES	Negative	LIVING	YES	No	YES	Primary Tumor	430	0	430	0	low	1
TCGA.D8.A27E.01	>=60	FEMALE	Other	LumA	Positive	Positive	Negative	Post	T1	N0	M0	I	YES	Negative	LIVING	YES	No	YES	Primary Tumor	530	0	530	0	high	1
TCGA.D8.A27F.01	<60	FEMALE	Infiltrating Ductal Carcinoma	Basal	Negative	Negative	Negative	Pre	T2	N0	M0	II	YES	Negative	LIVING	YES	No	YES	Primary Tumor	488	0	488	0	low	1
TCGA.D8.A27G.01	>=60	FEMALE	Infiltrating Lobular Carcinoma	LumA	Positive	Positive	Equivocal	Post	T2	N0	M0	II	YES	Negative	LIVING	NO	No	NO	Primary Tumor	409	0	409	0	high	1
TCGA.D8.A27H.01	>=60	FEMALE	Infiltrating Ductal Carcinoma	Basal	Negative	Negative	Negative	Post	T2	N0	M0	II	YES	Negative	LIVING	NO	No	YES	Primary Tumor	397	0	397	0	low	1
TCGA.D8.A27I.01	<60	FEMALE	Infiltrating Lobular Carcinoma	LumA	Positive	Positive	Negative	Post	T1	N2	M0	III	YES	Negative	LIVING	YES	No	YES	Primary Tumor	439	0	439	0	high	1
TCGA.D8.A27K.01	<60	FEMALE	Infiltrating Ductal Carcinoma	LumA	Positive	Positive	Negative	Post	T2	N1	M0	II	YES	Negative	LIVING	NO	No	YES	Primary Tumor	1461	0	1461	0	high	1
TCGA.D8.A27L.01	<60	FEMALE	Infiltrating Ductal Carcinoma	LumA	Positive	Positive	Negative	Post	T1	N2	M0	III	YES	Negative	LIVING	NO	No	YES	Primary Tumor	499	0	499	0	high	1
TCGA.D8.A27M.01	<60	FEMALE	Infiltrating Ductal Carcinoma	Basal	Negative	Negative	Negative	Post	T1	N0	M0	I	YES	Negative	LIVING	NO	No	YES	Primary Tumor	410	0	410	0	high	1
TCGA.D8.A27N.01	<60	FEMALE	Infiltrating Ductal Carcinoma	LumB	Positive	Positive	Positive	Pre	T2	N2	M0	III	YES	Negative	LIVING	NO	No	YES	Primary Tumor	519	0	519	0	high	1
TCGA.D8.A27P.01	>=60	FEMALE	Infiltrating Ductal Carcinoma	LumA	Positive	Positive	Negative	Post	T1	N0	M0	I	YES	Negative	LIVING	NO	No	NO	Primary Tumor	49	0	49	0	low	1
TCGA.D8.A27R.01	<60	FEMALE	Infiltrating Ductal Carcinoma	LumB	Positive	Positive	Equivocal	Post	T2	N3	M0	III	YES	Negative	LIVING		No		Primary Tumor	29	0			high	1
TCGA.D8.A27T.01	<60	FEMALE	Infiltrating Lobular Carcinoma	LumA	Positive	Positive	Negative	Post	T2	N3	M0	III	YES	Negative	LIVING	YES	No	YES	Primary Tumor	398	0	398	0	high	1
TCGA.D8.A27V.01	>=60	FEMALE	Infiltrating Lobular Carcinoma	LumA	Positive	Positive	Negative	Post	T2	N0	M0	II	YES	Negative	LIVING	NO	No	YES	Primary Tumor	381	0	381	0	high	1
TCGA.D8.A27W.01	<60	FEMALE	Other	LumB	Positive	Positive	Equivocal	Post	T4	N0	M0	III	YES	Negative	LIVING	YES	No	YES	Primary Tumor	373	0	373	0	high	1
TCGA.D8.A3Z5.01	<60	FEMALE	Infiltrating Lobular Carcinoma		Positive	Positive	Negative	Post	T2	N3	M0	III	YES	Negative	LIVING	NO	No		Primary Tumor	1015	0	1015	0	low	1
TCGA.D8.A3Z6.01	<60	FEMALE	Infiltrating Lobular Carcinoma		Positive	Positive	Negative	Post	T3	N3	M0	III	YES	Negative	LIVING	YES	No		Primary Tumor	563	0	563	0	low	1
TCGA.D8.A4Z1.01	>=60	FEMALE	Infiltrating Lobular Carcinoma		Positive	Positive	Negative	Post	T1	N0	M0	I	YES	Negative	LIVING	NO	No		Primary Tumor	659	0	659	0	high	1
TCGA.D8.A73U.01	>=60	FEMALE	Infiltrating Lobular Carcinoma		Positive	Positive	Negative	Post	T2	N0	M0	II	NO	Negative	LIVING	NO	No		Primary Tumor	492	0	492	0	high	1
TCGA.D8.A73W.01	>=60	FEMALE	Other		Positive	Negative	Negative	Post	T3	N1	MX	III	YES	Negative	DECEASED	YES	No		Primary Tumor	385	1	21	1	low	1
TCGA.D8.A73X.01	<60	FEMALE	Other		Positive	Positive	Negative	Post	T2	N0	M0	II	NO	Negative	LIVING	YES	No		Primary Tumor	767	0	767	0	low	1
TCGA.E2.A105.01	>=60	FEMALE	Infiltrating Ductal Carcinoma	LumA	Positive	Positive	Equivocal	Post	T2	N0	M0	II		Negative	LIVING	YES	No	YES	Primary Tumor	1308	0	1308	0	low	1
TCGA.E2.A106.01	<60	FEMALE	Infiltrating Ductal Carcinoma	LumA	Positive	Positive	Equivocal	Pre	T1	N1	M0	I		Close	LIVING	NO	No	YES	Primary Tumor	2541	0	2541	0	low	1
TCGA.E2.A107.01	<60	FEMALE	Infiltrating Lobular Carcinoma		Positive	Negative	Equivocal	Post	T3	N2	M0	III		Negative	LIVING	YES	No	YES	Primary Tumor	1047	0	1047	0	high	1
TCGA.E2.A108.01	>=60	FEMALE	Infiltrating Ductal Carcinoma	Normal	Positive	Positive	Negative	Post	T2	N2	M0	III		Negative	LIVING	YES	No	YES	Primary Tumor	837	0	837	0	high	1
TCGA.E2.A109.01	>=60	FEMALE	Infiltrating Ductal Carcinoma	LumB	Positive	Negative	Equivocal	Post	T2	N0	M0	II		Negative	LIVING	NO	No	YES	Primary Tumor	1417	0	1417	0	high	1
TCGA.E2.A10A.01	<60	FEMALE	Infiltrating Ductal Carcinoma	LumA	Positive	Positive	Positive	Pre	T3	N0	M0	II		Negative	LIVING	YES	No	YES	Primary Tumor	1229	0	92	1	low	1
TCGA.E2.A10B.01	>=60	FEMALE	Infiltrating Ductal Carcinoma	LumA	Positive	Positive	Equivocal	Post	T2	N1	M0	II		Close	LIVING	YES	No	YES	Primary Tumor	1141	0	195	1	high	1
TCGA.E2.A10C.01	<60	FEMALE	Infiltrating Ductal Carcinoma	LumB	Positive	Positive	Negative	Post	T2	N1	M0	II		Negative	LIVING	YES	No	YES	Primary Tumor	1220	0	1220	0	high	1
TCGA.E2.A10E.01	>=60	FEMALE	Infiltrating Ductal Carcinoma	LumA	Positive	Positive	Equivocal	Post	T1	N1	M0	II		Negative	LIVING	YES	No	YES	Primary Tumor	865	0	865	0	high	1
TCGA.E2.A10F.01	<60	FEMALE	Infiltrating Lobular Carcinoma	LumA	Positive	Positive	Equivocal	Pre	T2	N0	M0	II		Negative	LIVING	YES	No	YES	Primary Tumor	878	0	878	0	high	1
TCGA.E2.A14N.01	<60	FEMALE	Infiltrating Ductal Carcinoma	Basal	Negative	Negative	Negative	Pre	T2	N1	M0	II	YES	Negative	LIVING	YES	No	YES	Primary Tumor	1434	0	1434	0	high	1
TCGA.E2.A14O.01	>=60	FEMALE	Infiltrating Ductal Carcinoma	LumB	Positive	Positive	Equivocal	Post	T3	N1	M0	III	YES	Negative	LIVING	YES	No	YES	Primary Tumor	1359	0	1359	0	low	1
TCGA.E2.A14P.01	>=60	FEMALE	Infiltrating Ductal Carcinoma	Her2	Negative	Negative	Positive	Post	T2	N3	M0	III	YES	Negative	LIVING	YES	No	NO	Primary Tumor	1246	0	1246	0	high	1
TCGA.E2.A14Q.01	<60	FEMALE	Infiltrating Ductal Carcinoma	LumA	Positive	Positive	Negative	Pre	T2	N1	M0	II	YES	Negative	LIVING	NO	No	YES	Primary Tumor	1163	0	1163	0	high	1
TCGA.E2.A14R.01	>=60	FEMALE	Infiltrating Ductal Carcinoma	Basal	Negative	Negative	Negative	Post	T2	N0	M0	II	YES	Negative	LIVING	YES	No	YES	Primary Tumor	1174	0	971	1	high	1
TCGA.E2.A14S.01	>=60	FEMALE	Infiltrating Ductal Carcinoma	LumB	Positive	Positive	Equivocal	Post	T1	N0	M0	I	YES	Negative	LIVING	YES	No	YES	Primary Tumor	1009	0	1009	0	high	1
TCGA.E2.A14T.01	<60	FEMALE	Infiltrating Ductal Carcinoma	LumA	Positive	Positive	Negative	Post	T2	N0	M0	II	YES	Negative	LIVING	NO	No	YES	Primary Tumor	2311	0	2311	0	high	1
TCGA.E2.A14U.01	>=60	FEMALE	Infiltrating Lobular Carcinoma		Positive	Positive	Equivocal	Post	T1	N0	M0	I	YES	Negative	LIVING	NO	No	YES	Primary Tumor	1318	0	1318	0	low	1
TCGA.E2.A14V.01	<60	FEMALE	Infiltrating Ductal Carcinoma	Her2	Positive	Positive	Positive	Post	T2	N1	M0	II	YES	Negative	LIVING	YES	No	YES	Primary Tumor	1042	0	1042	0	high	1
TCGA.E2.A14W.01	>=60	MALE	Infiltrating Ductal Carcinoma	LumB	Positive	Positive			T2	N0	M0	II	YES	Negative	LIVING	NO	No	YES	Primary Tumor	974	0	974	0	low	1
TCGA.E2.A14X.01	<60	FEMALE	Infiltrating Ductal Carcinoma	Basal	Negative	Negative	Negative	Post	T2	N2	M0	III	YES	Negative	LIVING	YES	No	YES	Primary Tumor	972	0	972	0	high	1
TCGA.E2.A14Y.01	<60	FEMALE	Infiltrating Ductal Carcinoma	Basal	Positive	Positive	Equivocal	Pre	T2	N0	M0	II	YES	Negative	LIVING	NO	No	YES	Primary Tumor	2109	0	2109	0	low	1
TCGA.E2.A14Z.01	>=60	FEMALE	Infiltrating Ductal Carcinoma	LumA	Positive	Positive	Negative	Post	T1	N0	M0	I	YES	Negative	DECEASED	YES	No	YES	Primary Tumor	563	1	188	1	high	1
TCGA.E2.A150.01	<60	FEMALE	Infiltrating Ductal Carcinoma	Basal	Negative	Negative	Negative	Post	T2	N0	M0	II	YES	Negative	LIVING	YES	No	YES	Primary Tumor	1935	0	1935	0	high	1
TCGA.E2.A152.01	<60	FEMALE	Infiltrating Ductal Carcinoma	Her2	Positive	Negative	Positive	Post	T1	N0	M0	I	YES	Negative	LIVING	NO	No	YES	Primary Tumor	2128	0	966	1	low	1
TCGA.E2.A153.01	<60	FEMALE	Infiltrating Ductal Carcinoma	LumA	Positive	Positive	Negative	Pre	T2	N1	M0	II	YES	Negative	LIVING	YES	No	YES	Primary Tumor	707	0	707	0	high	1
TCGA.E2.A154.01	>=60	FEMALE	Infiltrating Ductal Carcinoma	LumA	Positive	Positive	Negative	Post	T1	N0	M0	I	YES	Negative	LIVING	YES	No	YES	Primary Tumor	591	0	591	0	low	1
TCGA.E2.A155.01	<60	FEMALE	Infiltrating Ductal Carcinoma	LumB	Positive	Negative	Negative	Post	T2	N1	M0	II	YES	Negative	LIVING	NO	No	YES	Primary Tumor	640	0	640	0	low	1
TCGA.E2.A156.01	>=60	FEMALE	Infiltrating Ductal Carcinoma	LumA	Positive	Positive	Negative	Post	T1	N0	M0	I	YES	Negative	LIVING	YES	No	YES	Primary Tumor	726	0	726	0	low	1
TCGA.E2.A158.01	<60	FEMALE	Infiltrating Ductal Carcinoma	Basal	Negative	Negative	Negative	Pre	T1	N1	M0	II	YES	Negative	LIVING	NO	No	YES	Primary Tumor	450	0	450	0	low	1
TCGA.E2.A159.01	<60	FEMALE	Infiltrating Ductal Carcinoma	Basal	Negative	Negative		Pre	T2	N0	M0	II	YES	Negative	LIVING	YES	No	YES	Primary Tumor	762	0	762	0	high	1
TCGA.E2.A15A.01	<60	FEMALE	Infiltrating Ductal Carcinoma	LumB	Positive	Positive	Negative	Pre	T2	N3	M0	III	YES	Negative	LIVING	YES	No	YES	Primary Tumor	710	0	710	0	high	1
TCGA.E2.A15A.06	<60	FEMALE	Infiltrating Ductal Carcinoma	LumB	Positive	Positive	Negative	Pre	T2	N3	M0	III	YES	Negative	LIVING	YES	No	YES	Metastatic	710	0	710	0	high	1
TCGA.E2.A15C.01	>=60	FEMALE	Infiltrating Ductal Carcinoma	LumA	Positive	Positive	Equivocal	Post	T1	N0	M0	I	YES	Negative	LIVING	YES	No	YES	Primary Tumor	694	0	694	0	high	1
TCGA.E2.A15D.01	<60	FEMALE	Infiltrating Ductal Carcinoma	LumA	Positive	Positive	Equivocal	Pre	T2	N0	M0	II	YES	Negative	LIVING	YES	No	YES	Primary Tumor	526	0	526	0	high	1
TCGA.E2.A15E.01	<60	FEMALE	Infiltrating Ductal Carcinoma	LumA	Positive	Positive		Pre	T1	N1	M0	II	YES	Negative	LIVING	YES	No	YES	Primary Tumor	630	0	630	0	low	1
TCGA.E2.A15E.06	<60	FEMALE	Infiltrating Ductal Carcinoma	LumA	Positive	Positive		Pre	T1	N1	M0	II	YES	Negative	LIVING	YES	No	YES	Metastatic	630	0	630	0	high	1
TCGA.E2.A15F.01	>=60	FEMALE	Infiltrating Ductal Carcinoma		Positive	Positive	Negative	Post	T1	N0	M0	I	YES	Negative	LIVING	YES	No	YES	Primary Tumor	658	0	658	0	high	1
TCGA.E2.A15G.01	>=60	FEMALE	Other	LumA	Positive	Positive	Negative	Post	T2	N0	M0	II	YES	Negative	LIVING	YES	No	YES	Primary Tumor	554	0	554	0	low	1
TCGA.E2.A15H.01	<60	FEMALE	Infiltrating Ductal Carcinoma	LumA	Positive	Positive	Equivocal	Pre	T1	N1	M0	II	YES	Negative	LIVING	NO	No	YES	Primary Tumor	393	0	393	0	high	1
TCGA.E2.A15I.01	<60	FEMALE	Infiltrating Ductal Carcinoma	LumA	Positive	Positive	Equivocal	Pre	T2	N0	M0	II	YES	Negative	LIVING	NO	No	YES	Primary Tumor	1692	0	1692	0	high	1
TCGA.E2.A15J.01	<60	FEMALE	Infiltrating Ductal Carcinoma	LumA	Positive	Positive	Equivocal	Pre	T1	N0	M0	I	YES	Negative	LIVING	NO	No	YES	Primary Tumor	1640	0	1640	0	low	1
TCGA.E2.A15K.01	<60	FEMALE	Infiltrating Ductal Carcinoma	LumB	Positive	Positive	Equivocal	Post	T2	N1	M0	II	YES	Negative	LIVING	YES	No	YES	Primary Tumor	275	0	275	0	high	1
TCGA.E2.A15K.06	<60	FEMALE	Infiltrating Ductal Carcinoma	LumB	Positive	Positive	Equivocal	Post	T2	N1	M0	II	YES	Negative	LIVING	YES	No	YES	Metastatic	275	0	275	0	low	1
TCGA.E2.A15L.01	>=60	FEMALE	Infiltrating Lobular Carcinoma	LumA	Positive	Positive	Equivocal	Post	T2	N0	M0	II	YES	Negative	LIVING	NO	No	YES	Primary Tumor	626	0	626	0	low	1
TCGA.E2.A15M.01	>=60	FEMALE	Infiltrating Lobular Carcinoma	LumA	Positive	Positive	Negative	Post	T2	N0	M0	II	YES	Negative	DECEASED	YES	No	YES	Primary Tumor	336	1	336	0	high	1
TCGA.E2.A15O.01	>=60	FEMALE	Infiltrating Ductal Carcinoma	LumA	Positive	Positive	Equivocal	Post	T1	NX	M0	I	NO	Negative	LIVING	NO	No	YES	Primary Tumor	1545	0	1210	1	high	1
TCGA.E2.A15P.01	>=60	FEMALE	Infiltrating Ductal Carcinoma	LumA	Positive	Positive	Negative	Post	T1	N0	M0	I	YES	Negative	LIVING	YES	No	YES	Primary Tumor	595	0	595	0	low	1
TCGA.E2.A15R.01	>=60	FEMALE	Infiltrating Ductal Carcinoma	LumA	Positive	Positive	Equivocal	Post	T1	N1	M0	II	YES	Negative	LIVING	YES	No	YES	Primary Tumor	1732	0	1732	0	low	1
TCGA.E2.A15S.01	<60	FEMALE	Infiltrating Ductal Carcinoma	LumB	Positive	Negative	Equivocal	Post	T2	N1	M0	II	YES	Negative	LIVING	YES	No	YES	Primary Tumor	428	0	428	0	low	1
TCGA.E2.A15T.01	>=60	FEMALE	Infiltrating Ductal Carcinoma		Positive	Positive	Equivocal	Post	T2	N0	M0	II	YES	Negative	LIVING	NO	No	YES	Primary Tumor	1563	0	1563	0	low	1
TCGA.E2.A1AZ.01	>=60	FEMALE	Infiltrating Ductal Carcinoma	Basal	Negative	Negative	Indeterminate	Post	T2	N1	M0	II	YES	Negative	LIVING	YES	No	YES	Primary Tumor	2329	0	2329	0	high	1
TCGA.E2.A1B0.01	<60	FEMALE	Infiltrating Ductal Carcinoma	Her2	Negative	Negative	Positive	Post	T2	N2	M0	III	YES	Negative	LIVING	YES	No	YES	Primary Tumor	1631	0	1631	0	high	1
TCGA.E2.A1B1.01	<60	FEMALE	Infiltrating Ductal Carcinoma	LumA	Positive	Positive	Equivocal	Post	T2	N1	M0	II	YES	Negative	LIVING	YES	No	YES	Primary Tumor	2653	0	2653	0	high	1
TCGA.E2.A1B4.01	>=60	FEMALE	Infiltrating Ductal Carcinoma	LumA	Positive	Positive	Negative	Post	T1	N2	M0	III	YES	Negative	DECEASED	YES	No	YES	Primary Tumor	1004	1	1004	0	low	1
TCGA.E2.A1B5.01	<60	FEMALE	Infiltrating Lobular Carcinoma	LumA	Positive	Positive	Negative	Pre	T2	N0	M0	II	YES	Negative	LIVING	YES	No	YES	Primary Tumor	984	0	984	0	high	1
TCGA.E2.A1B6.01	<60	FEMALE	Infiltrating Ductal Carcinoma		Negative	Negative	Equivocal	Pre	T2	N0	M0	II	YES	Negative	LIVING	NO	No	YES	Primary Tumor	867	0	867	0	high	1
TCGA.E2.A1BC.01	>=60	FEMALE	Infiltrating Ductal Carcinoma	LumA	Positive	Positive	Negative	Post	T1	N0	M0	I	YES	Positive	LIVING	NO	No	YES	Primary Tumor	501	0	501	0	low	1
TCGA.E2.A1BD.01	<60	FEMALE	Infiltrating Ductal Carcinoma	LumA	Positive	Positive	Equivocal	Post	T2	N0	M0	II	YES	Negative	LIVING	YES	No	YES	Primary Tumor	1133	0	1133	0	low	1
TCGA.E2.A1IE.01	>=60	FEMALE	Infiltrating Ductal Carcinoma	LumA	Positive	Positive	Equivocal	Post	T2	N1	M0	II	YES	Negative	LIVING	YES	No	YES	Primary Tumor	2362	0	1810	1	low	1
TCGA.E2.A1IF.01	>=60	FEMALE	Infiltrating Ductal Carcinoma	LumA	Positive	Positive	Negative	Post	T1	N0	M0	I	YES	Negative	LIVING	NO	No	YES	Primary Tumor	1138	0	1138	0	high	1
TCGA.E2.A1IG.01	<60	FEMALE	Infiltrating Ductal Carcinoma	LumA	Positive	Positive	Negative	Pre	T2	N1	M0	II	YES	Negative	LIVING	YES	No	YES	Primary Tumor	2140	0	2140	0	low	1
TCGA.E2.A1IH.01	>=60	FEMALE	Infiltrating Lobular Carcinoma	LumA	Positive	Positive	Equivocal	Post	T1	N0	M0	I	YES	Negative	LIVING	NO	No	YES	Primary Tumor	1026	0	1026	0	high	1
TCGA.E2.A1II.01	<60	FEMALE	Infiltrating Ductal Carcinoma	Basal	Negative	Positive	Negative	Post	T1	N0	M0	I	YES	Negative	LIVING	YES	No	YES	Primary Tumor	1025	0	1025	0	high	1
TCGA.E2.A1IJ.01	<60	FEMALE	Infiltrating Lobular Carcinoma	LumA	Positive	Positive	Equivocal	Post	T1	N0	M0	I	YES	Negative	LIVING	YES	No	YES	Primary Tumor	865	0	865	0	high	1
TCGA.E2.A1IK.01	>=60	FEMALE	Infiltrating Ductal Carcinoma	LumA	Positive	Positive	Negative	Post	T1	N1	M0	II	YES	Negative	LIVING	NO	No	YES	Primary Tumor	1800	0	1800	0	high	1
TCGA.E2.A1IL.01	>=60	FEMALE	Infiltrating Lobular Carcinoma	LumA	Positive	Positive	Negative	Post	T1	N1	M0	II	YES	Negative	LIVING	YES	No	YES	Primary Tumor	118	0	118	0	low	1
TCGA.E2.A1IN.01	>=60	FEMALE	Infiltrating Ductal Carcinoma	LumA	Positive	Positive	Negative	Post	T1	N0	M0	I	YES	Negative	LIVING	YES	No	YES	Primary Tumor	675	0	675	0	low	1
TCGA.E2.A1IO.01	<60	FEMALE	Infiltrating Ductal Carcinoma	LumA	Positive	Positive	Equivocal	Pre	T1	N0	M0	I	YES	Negative	LIVING	YES	No	YES	Primary Tumor	1855	0	1855	0	high	1
TCGA.E2.A1IP.01				Basal															Primary Tumor					high	1
TCGA.E2.A1IU.01	>=60	FEMALE	Infiltrating Ductal Carcinoma	LumA	Positive	Positive	Negative	Post	T1	N0	M0	I	YES	Negative	LIVING	NO	No	YES	Primary Tumor	337	0	337	0	high	1
TCGA.E2.A1L6.01	<60	FEMALE	Infiltrating Ductal Carcinoma	LumA	Positive	Positive	Negative	Pre	T1	N1	M0	II	YES	Negative	LIVING	NO	No	YES	Primary Tumor	1648	0	1648	0	high	1
TCGA.E2.A1L7.01	<60	FEMALE	Infiltrating Ductal Carcinoma	LumB	Negative	Negative	Negative	Pre	T2	N2	M0	III	YES	Negative	LIVING	YES	No	YES	Primary Tumor	1836	0	1619	1	high	1
TCGA.E2.A1L8.01	<60	FEMALE	Infiltrating Lobular Carcinoma	LumA	Positive	Positive	Equivocal	Post	T2	N1	M0	II	YES	Negative	LIVING	YES	No	YES	Primary Tumor	2240	0	2240	0	high	1
TCGA.E2.A1L9.01	<60	FEMALE	Infiltrating Ductal Carcinoma	LumA	Positive	Positive	Negative	Pre	T1	N1	M0	II	YES	Negative	LIVING	YES	No	YES	Primary Tumor	598	0	598	0	high	1
TCGA.E2.A1LA.01	<60	FEMALE	Infiltrating Ductal Carcinoma	LumA	Positive	Positive	Equivocal	Post	T1	N1	M0	II	YES	Negative	LIVING	NO	No	YES	Primary Tumor	748	0	748	0	high	1
TCGA.E2.A1LB.01	<60	FEMALE	Infiltrating Ductal Carcinoma	Her2	Negative	Negative	Positive	Pre	T2	N1	M0	II	YES	Negative	LIVING	YES	No	YES	Primary Tumor	2306	0	2306	0	low	1
TCGA.E2.A1LE.01	>=60	FEMALE	Infiltrating Ductal Carcinoma		Negative	Negative	Positive	Post	T2	N3	M0	III	YES	Negative	DECEASED	YES	No	YES	Primary Tumor	879	1	361	1	high	1
TCGA.E2.A1LG.01	<60	FEMALE	Infiltrating Lobular Carcinoma	Basal	Negative	Negative	Equivocal	Peri	T2	N0	M0	II	YES	Negative	LIVING	NO	No	YES	Primary Tumor	1523	0	1523	0	high	1
TCGA.E2.A1LH.01	<60	FEMALE	Infiltrating Ductal Carcinoma	Basal	Negative	Negative	Negative	Post	T1	N0	M0	I	YES	Negative	LIVING	YES	No	YES	Primary Tumor	3247	0	3247	0	high	1
TCGA.E2.A1LI.01	<60	FEMALE	Infiltrating Ductal Carcinoma	Basal	Negative	Negative	Equivocal	Post	T2	N1	M0	II	YES	Close	LIVING	YES	No	YES	Primary Tumor	3121	0	3121	0	high	1
TCGA.E2.A1LK.01	>=60	FEMALE	Infiltrating Ductal Carcinoma	Basal	Negative	Negative	Equivocal	Post	T4	N3	M0	III	YES	Negative	DECEASED	NO	No	NO	Primary Tumor	266	1	155	1	low	1
TCGA.E2.A1LL.01	>=60	FEMALE	Infiltrating Ductal Carcinoma	Basal	Negative	Negative	Negative	Post	T3	N2	MX	III	YES	Negative	LIVING	YES	No	YES	Primary Tumor	1309	0	1303	1	low	1
TCGA.E2.A1LS.01	<60	FEMALE	Infiltrating Ductal Carcinoma	Basal	Negative	Negative	Negative	Pre	T1	N0	M0	I	YES	Negative	LIVING	NO	No	YES	Primary Tumor	1604	0	1604	0	low	1
TCGA.E2.A2P5.01	>=60	FEMALE	Infiltrating Lobular Carcinoma		Positive	Positive		Post	T2	N3	M0	III	YES	Negative	DECEASED	YES	No	YES	Primary Tumor	821	1	597	1	high	1
TCGA.E2.A2P6.01	>=60	FEMALE	Infiltrating Lobular Carcinoma		Positive	Positive		Post	T2	N1	M0	II	YES	Positive	LIVING	NO	No	YES	Primary Tumor	1051	0	1051	0	high	1
TCGA.E2.A3DX.01	<60	FEMALE	Infiltrating Lobular Carcinoma	LumA	Positive	Positive		Pre	T2	N3	M0	III	YES	Positive	LIVING	YES	No		Primary Tumor	1325	0	1325	0	high	1
TCGA.E2.A56Z.01	>=60	FEMALE	Infiltrating Ductal Carcinoma		Positive	Positive	Equivocal	Post	T2	N1	M0	II	YES	Negative	LIVING	YES	No		Primary Tumor	252	0	252	0	low	1
TCGA.E2.A570.01	<60	FEMALE	Infiltrating Ductal Carcinoma		Positive	Positive	Equivocal	Pre	T1	N1	M0	I	YES	Negative	LIVING	NO	No		Primary Tumor	931	0	931	0	low	1
TCGA.E2.A572.01	>=60	FEMALE	Infiltrating Ductal Carcinoma		Positive	Positive	Equivocal	Post	T2	N2	M0	III	YES	Negative	LIVING	YES	No		Primary Tumor	1208	0	1208	0	low	1
TCGA.E2.A573.01	<60	FEMALE	Infiltrating Ductal Carcinoma		Negative	Negative	Equivocal	Peri	T1	N0	M0	I	YES	Negative	LIVING	YES	No		Primary Tumor	1062	0	1062	0	high	1
TCGA.E2.A574.01	<60	FEMALE	Infiltrating Ductal Carcinoma		Negative	Negative	Equivocal	Pre	T2	N0	M0	II	YES	Negative	LIVING	YES	No		Primary Tumor	1179	0	1179	0	low	1
TCGA.E2.A576.01	>=60	FEMALE	Infiltrating Lobular Carcinoma		Positive	Positive	Equivocal	Post	T1	N0	MX	I	YES	Negative	LIVING	YES	No		Primary Tumor	1043	0	1043	0	high	1
TCGA.E2.A9RU.01	>=60	FEMALE	Infiltrating Ductal Carcinoma		Positive	Negative	Equivocal	Post	T2	N3	MX	III	YES	Negative	LIVING	YES	No		Primary Tumor	538	0	538	0	low	1
TCGA.E9.A1N3.01	>=60	FEMALE	Other	LumA				Post	T1	N2	M0	III	YES	Negative	LIVING	NO	No	YES	Primary Tumor	1059	0	1059	0	low	1
TCGA.E9.A1N4.01	<60	FEMALE	Other	LumA	Positive	Positive	Positive	Pre	T2	N2	M0	III	YES	Negative	LIVING	YES	No	YES	Primary Tumor	1000	0	1000	0	high	1
TCGA.E9.A1N5.01	<60	FEMALE	Other	LumA	Positive	Positive	Positive	Post	T2	N1	M0	II	YES	Negative	LIVING	NO	No	YES	Primary Tumor	1120	0	1120	0	high	1
TCGA.E9.A1N6.01	<60	FEMALE	Infiltrating Ductal Carcinoma	LumB	Positive	Positive	Positive	Post	T2	N1	M0	II	YES	Negative	DECEASED	YES	No	YES	Primary Tumor	678	1	443	1	low	1
TCGA.E9.A1N8.01	<60	FEMALE	Infiltrating Ductal Carcinoma	Basal	Negative		Negative	Post	T2	N0	M0	II	YES	Negative	LIVING	NO	No	YES	Primary Tumor	1039	0	1039	0	low	1
TCGA.E9.A1N9.01	<60	FEMALE	Other	Basal	Negative	Positive	Positive	Post	T2	N0	M0	II	YES	Negative	LIVING	NO	No	YES	Primary Tumor	1101	0	1101	0	high	1
TCGA.E9.A1NA.01	<60	FEMALE	Other	LumB	Positive	Positive	Positive	Post	T2	N0	M0	II	YES	Negative	LIVING	YES	No	YES	Primary Tumor	1112	0	1112	0	low	1
TCGA.E9.A1NC.01	>=60	FEMALE	Other		Negative	Positive	Positive	Post	T2	N1	M0	II	YES	Negative	LIVING	NO	No	YES	Primary Tumor	1203	0	1203	0	high	1
TCGA.E9.A1ND.01	>=60	FEMALE	Infiltrating Ductal Carcinoma	Basal	Negative	Negative	Positive	Post	T2	N1	M0	II	YES	Negative	LIVING	NO	No	YES	Primary Tumor	1266	0	1266	0	high	1
TCGA.E9.A1NE.01	<60	FEMALE	Infiltrating Ductal Carcinoma	LumA	Positive	Positive	Negative	Pre	T2	N1	M0	II	YES	Negative	LIVING	YES	No	YES	Primary Tumor	1088	0	1088	0	high	1
TCGA.E9.A1NF.01	>=60	FEMALE	Other	LumB	Positive	Positive	Negative	Post	T2	N0	M0	II	YES	Negative	DECEASED	NO	No	YES	Primary Tumor	1072	1	1072	0	high	1
TCGA.E9.A1NG.01	>=60	FEMALE	Infiltrating Ductal Carcinoma	LumA	Positive	Positive	Negative	Post	T2	N0	M0	II	YES	Negative	DECEASED	NO	No	YES	Primary Tumor	786	1	786	0	high	1
TCGA.E9.A1NH.01	>=60	FEMALE	Infiltrating Ductal Carcinoma	LumA	Positive	Positive	Negative	Post	T2	N1	M0	II	YES	Negative	LIVING	NO	No		Primary Tumor	576	0	576	0	low	1
TCGA.E9.A1NI.01	<60	FEMALE	Other	LumB	Positive	Positive	Negative	Post	T2	N0	M0	II	YES	Negative	LIVING	NO	No	YES	Primary Tumor	300	0	300	0	low	1
TCGA.E9.A1QZ.01	>=60	FEMALE	Infiltrating Ductal Carcinoma	LumA				Post	T2	N0	M0	II	YES	Negative	LIVING	NO	No	NO	Primary Tumor	755	0	755	0	high	1
TCGA.E9.A1R0.01	<60	FEMALE	Infiltrating Ductal Carcinoma	LumA				Post	T1	N1	M0	II	YES		LIVING	NO	No	YES	Primary Tumor	860	0	860	0	high	1
TCGA.E9.A1R2.01	<60	FEMALE	Infiltrating Ductal Carcinoma	LumA	Positive	Negative	Equivocal	Post	T2	N3	MX	III	YES	Positive	LIVING	YES	No	YES	Primary Tumor	1063	0	1063	0	high	1
TCGA.E9.A1R3.01	>=60	FEMALE	Infiltrating Ductal Carcinoma	LumA				Post	T2	N3	M0	III	YES	Negative	LIVING	YES	No	YES	Primary Tumor	78	0	78	0	low	1
TCGA.E9.A1R4.01	>=60	FEMALE	Infiltrating Ductal Carcinoma	LumB				Post	T1	N0	M0	I	YES	Negative	LIVING	YES	No	YES	Primary Tumor	186	0	186	0	high	1
TCGA.E9.A1R5.01	>=60	FEMALE	Infiltrating Ductal Carcinoma	LumA				Post	T1	N0	M0	I	YES	Negative	LIVING	YES	No	YES	Primary Tumor	92	0	92	0	low	1
TCGA.E9.A1R6.01	>=60	FEMALE	Infiltrating Ductal Carcinoma	LumA				Post	T2	N0	M0	II	YES	Negative	LIVING	YES	No	YES	Primary Tumor	339	0	339	0	low	1
TCGA.E9.A1R7.01	>=60	FEMALE	Infiltrating Ductal Carcinoma	LumB				Post	T2	N0	M0	II	YES	Negative	LIVING	YES	No	YES	Primary Tumor	1467	0	1467	0	low	1
TCGA.E9.A1RA.01	<60	FEMALE	Infiltrating Ductal Carcinoma					Pre	T1	N0	M0	I	YES	Negative	LIVING	YES	No	YES	Primary Tumor	1369	0	1369	0	high	1
TCGA.E9.A1RB.01	<60	FEMALE	Infiltrating Ductal Carcinoma	LumB				Pre	T2	N0	M0	II	YES	Negative	DECEASED	NO	No	YES	Primary Tumor	976	1	976	0	low	1
TCGA.E9.A1RC.01	<60	FEMALE	Other	LumA				Post	T4	N3	M0	III	YES	Negative	LIVING	NO	No	YES	Primary Tumor	1224	0	1224	0	low	1
TCGA.E9.A1RD.01	>=60	FEMALE	Infiltrating Ductal Carcinoma	LumA				Post	T2	N0	M0	II	YES	Negative	LIVING	NO	No	YES	Primary Tumor	34	0	34	0	low	1
TCGA.E9.A1RE.01	>=60	FEMALE	Infiltrating Ductal Carcinoma	LumB				Post	T2	N2	M0	III	YES	Negative	LIVING	YES	No	YES	Primary Tumor	1419	0	1419	0	high	1
TCGA.E9.A1RF.01	>=60	FEMALE	Infiltrating Ductal Carcinoma	LumA				Post	T2	N2	M0	III	YES	Negative	LIVING	YES	No	YES	Primary Tumor	200	0	200	0	high	1
TCGA.E9.A1RG.01	>=60	FEMALE	Infiltrating Ductal Carcinoma					Post	T1	N2	M0	III	YES	Negative	LIVING	YES	No	YES	Primary Tumor	647	0	647	0	high	1
TCGA.E9.A1RH.01	>=60	FEMALE	Infiltrating Ductal Carcinoma	Her2				Post	T2	N0	M0	II	YES	Negative	LIVING	YES	No	YES	Primary Tumor	1417	0	1417	0	low	1
TCGA.E9.A1RI.01	<60	FEMALE	Other	LumA				Pre	T1	N2	M0	III	YES	Negative	LIVING	YES	No	YES	Primary Tumor	1449	0	1449	0	high	1
TCGA.E9.A226.01	<60	FEMALE	Infiltrating Ductal Carcinoma	LumB				Pre	T2	N2	M0	III	YES	Negative	DECEASED	YES	No	YES	Primary Tumor	1048	1	1048	0	low	1
TCGA.E9.A227.01	<60	FEMALE	Infiltrating Ductal Carcinoma	LumA	Positive	Positive	Negative	Pre	T2	N1	M0	II	YES	Positive	LIVING	YES	No	YES	Primary Tumor	975	0	975	0	high	1
TCGA.E9.A228.01	<60	FEMALE	Infiltrating Ductal Carcinoma	LumB				Post	T2	N1	M0	II	YES	Negative	LIVING	NO	No	YES	Primary Tumor	1285	0	1285	0	low	1
TCGA.E9.A229.01	<60	FEMALE	Infiltrating Ductal Carcinoma	LumA				Pre	T1	N0	M0	I	YES	Negative	LIVING	YES	No	YES	Primary Tumor	1148	0	1148	0	high	1
TCGA.E9.A22A.01	>=60	FEMALE	Infiltrating Ductal Carcinoma	LumB	Positive	Negative	Negative	Post	T2	N0	M0	II	YES	Negative	LIVING	NO	No	YES	Primary Tumor	1189	0	1189	0	high	1
TCGA.E9.A22B.01	>=60	FEMALE	Other	LumA	Positive	Negative	Negative	Post	T1	N0	M0	I	YES	Negative	LIVING	NO	No	YES	Primary Tumor	1167	0	1167	0	high	1
TCGA.E9.A22D.01	<60	FEMALE	Infiltrating Ductal Carcinoma	LumB	Positive	Positive	Positive	Pre	T2	N0	M0	II	YES	Negative	LIVING	NO	No	YES	Primary Tumor	1248	0	1248	0	high	1
TCGA.E9.A22E.01	<60	FEMALE	Infiltrating Ductal Carcinoma	LumB	Positive	Positive	Positive	Post	T2	N2	M0	III	YES	Negative	LIVING	YES	No	YES	Primary Tumor	1269	0	1269	0	high	1
TCGA.E9.A22G.01	<60	FEMALE	Infiltrating Ductal Carcinoma	Basal	Negative	Negative	Positive	Post	T2	N0	M0	II	YES	Negative	LIVING	NO	No	YES	Primary Tumor	1239	0	1239	0	low	1
TCGA.E9.A22H.01	<60	FEMALE	Infiltrating Ductal Carcinoma	LumB	Positive	Positive	Positive	Pre	T2	N1	M0	II	YES	Negative	LIVING	YES	No	YES	Primary Tumor	1232	0	1232	0	high	1
TCGA.E9.A243.01	<60	FEMALE	Infiltrating Ductal Carcinoma	Basal				Peri	T2	N0	M0	II	YES	Negative	LIVING	YES	No	YES	Primary Tumor	612	0	305	1	high	1
TCGA.E9.A244.01	<60	FEMALE	Infiltrating Ductal Carcinoma	Basal				Post	T2	N0	M0	II	YES	Negative	LIVING	NO	No	YES	Primary Tumor	21	0	21	0	high	1
TCGA.E9.A245.01	<60	FEMALE	Infiltrating Ductal Carcinoma	LumA				Pre	T2	N1	M0	II	YES	Negative	DECEASED	NO	No	YES	Primary Tumor					low	1
TCGA.E9.A247.01	<60	FEMALE	Infiltrating Ductal Carcinoma	LumA				Post	T1	N0	M0	I	YES	Negative	LIVING	YES	No	YES	Primary Tumor	1186	0	1186	0	low	1
TCGA.E9.A248.01	<60	FEMALE	Infiltrating Ductal Carcinoma	Her2				Peri	T2	N0	M0	II	YES	Negative	LIVING	NO	No	YES	Primary Tumor	59	0	59	0	high	1
TCGA.E9.A249.01	<60	FEMALE	Infiltrating Ductal Carcinoma	LumB				Pre	T2	N0	M0	II	YES	Negative	LIVING	YES	No	YES	Primary Tumor	217	0	217	0	high	1
TCGA.E9.A24A.01	>=60	FEMALE	Infiltrating Ductal Carcinoma	LumA				Post	T1	N1	M0	II	YES	Negative	LIVING	YES	No	YES	Primary Tumor	747	0	747	0	low	1
TCGA.E9.A295.01	>=60	FEMALE	Infiltrating Lobular Carcinoma	LumA	Positive	Positive	Positive	Post	T2	N0	M0	II	YES	Negative	LIVING	YES	No		Primary Tumor	375	0	375	0	high	1
TCGA.E9.A2JS.01	>=60	FEMALE	Infiltrating Lobular Carcinoma	LumB				Post	T2	N1	M0	II	YES	Negative	DECEASED	YES	No	YES	Primary Tumor	904	1	524	1	low	1
TCGA.E9.A2JT.01	>=60	FEMALE	Infiltrating Lobular Carcinoma	LumA				Post	T2	N0	M0	II	YES	Negative	LIVING	YES	No	YES	Primary Tumor	288	0	288	0	high	1
TCGA.E9.A3HO.01	<60	FEMALE	Infiltrating Lobular Carcinoma	LumB				Pre	T2	N0	M0	II	YES	Negative	LIVING	NO	No	YES	Primary Tumor	1158	0	1158	0	high	1
TCGA.E9.A3Q9.01	>=60	FEMALE	Infiltrating Lobular Carcinoma	LumA	Positive	Positive	Indeterminate	Post	T3	N3	M0	III	YES	Negative	LIVING	NO	No		Primary Tumor	1001	0	1001	0	high	1
TCGA.E9.A3QA.01	<60	FEMALE	Other					Pre	T2	N0	M0	II	YES	Negative	LIVING	NO	No		Primary Tumor	918	0	918	0	high	1
TCGA.E9.A3X8.01	<60	FEMALE	Infiltrating Lobular Carcinoma		Positive	Positive	Positive	Post	T2	N1	M0	II	YES	Negative	LIVING	YES	No		Primary Tumor	926	0	926	0	high	1
TCGA.E9.A54X.01	>=60	FEMALE	Other		Positive	Positive	Negative	Post	T1	N0	M0	I	YES	Negative	LIVING	NO	No		Primary Tumor	727	0	727	0	low	1
TCGA.E9.A54Y.01	>=60	FEMALE	Infiltrating Lobular Carcinoma		Positive	Positive	Negative	Post	T2	N2	M0	III	YES	Negative	LIVING	NO	No		Primary Tumor	725	0	725	0	low	1
TCGA.E9.A5FK.01	>=60	FEMALE	Infiltrating Lobular Carcinoma		Positive	Positive	Negative	Post	T2	N3	M0	III	YES	Negative	LIVING	YES	No		Primary Tumor	812	0	812	0	high	1
TCGA.E9.A5FL.01	>=60	FEMALE	Other		Negative	Negative	Negative	Post	T3	N0	M0	II	YES	Negative	LIVING	NO	No		Primary Tumor	24	0	24	0	high	1
TCGA.E9.A5UO.01	<60	FEMALE	Other					Pre	T2	N0	M0	II	YES	Negative	LIVING	NO	No		Primary Tumor	785	0	785	0	low	1
TCGA.E9.A5UP.01	>=60	FEMALE	Other					Post	T2	N0	M0	II	YES	Negative	LIVING	YES	No		Primary Tumor	803	0	803	0	low	1
TCGA.E9.A6HE.01	<60	FEMALE	Infiltrating Lobular Carcinoma		Positive	Positive	Negative	Pre	T3	N3	MX	III	YES	Negative	LIVING	YES	No		Primary Tumor	847	0	847	0	high	1
TCGA.EW.A1IW.01	>=60	FEMALE	Infiltrating Lobular Carcinoma	LumA	Positive	Positive	Positive	Post	T2	N1	MX	II	YES	Negative	LIVING	NO	No	YES	Primary Tumor	371	0	371	0	high	1
TCGA.EW.A1IX.01	<60	FEMALE	Other	LumA	Positive	Positive	Negative	Peri	T1	N1	MX	II	YES	Negative	LIVING	NO	No	YES	Primary Tumor	1208	0	1208	0	high	1
TCGA.EW.A1IY.01	<60	FEMALE	Infiltrating Ductal Carcinoma	LumB	Positive	Positive	Negative	Pre	T1	N0	MX	I	YES	Negative	LIVING	NO	No	YES	Primary Tumor	258	0	258	0	high	1
TCGA.EW.A1IZ.01	<60	FEMALE	Infiltrating Ductal Carcinoma		Positive	Positive	Negative	Post	T2	N2	MX	III	YES	Negative	LIVING	YES	No	YES	Primary Tumor	554	0	554	0	high	1
TCGA.EW.A1J1.01	<60	FEMALE	Infiltrating Ductal Carcinoma	LumA	Positive	Positive	Negative	Pre	T2	N1	M0	II	YES	Negative	LIVING	YES	No	YES	Primary Tumor	575	0	575	0	high	1
TCGA.EW.A1J2.01	<60	FEMALE	Infiltrating Lobular Carcinoma	LumA	Positive	Positive	Negative	Pre	T1	N1	MX		YES	Negative	LIVING	NO	No	YES	Primary Tumor	403	0	403	0	high	1
TCGA.EW.A1J3.01	>=60	FEMALE	Infiltrating Lobular Carcinoma	LumA	Positive	Positive	Positive	Post	T1	N0	M0	I	YES	Negative	LIVING	NO	No	YES	Primary Tumor	504	0	504	0	high	1
TCGA.EW.A1J5.01	<60	FEMALE	Infiltrating Lobular Carcinoma	LumA	Positive	Positive	Negative	Post	T3	N0	M0	II	YES	Negative	LIVING	NO	No	YES	Primary Tumor	477	0	477	0	high	1
TCGA.EW.A1J6.01	>=60	FEMALE	Infiltrating Ductal Carcinoma	LumB	Positive	Positive	Negative	Post	T1	N0	M0	I	YES	Negative	LIVING	NO	No	YES	Primary Tumor	875	0	875	0	high	1
TCGA.EW.A1OV.01	<60	FEMALE	Infiltrating Ductal Carcinoma	Her2	Negative	Negative	Negative	Post	T2	N1	MX	II	YES	Close	LIVING	NO	No	YES	Primary Tumor	789	0	789	0	high	1
TCGA.EW.A1OW.01	<60	FEMALE	Infiltrating Ductal Carcinoma	Basal	Negative	Negative	Negative	Post	T2	N0	MX	II	YES	Negative	LIVING	YES	No	YES	Primary Tumor	694	0	694	0	low	1
TCGA.EW.A1OX.01	<60	FEMALE	Other	LumB	Positive	Positive	Negative	Pre	T2	N0	MX	II	YES	Negative	LIVING	YES	No	YES	Primary Tumor	911	0	911	0	low	1
TCGA.EW.A1OY.01	>=60	FEMALE	Infiltrating Ductal Carcinoma	LumB	Positive	Positive	Negative	Post	T2	N0	MX	II	YES	Negative	LIVING	YES	No	YES	Primary Tumor	908	0	908	0	low	1
TCGA.EW.A1OZ.01	<60	FEMALE	Infiltrating Ductal Carcinoma	LumB	Positive	Negative	Equivocal	Post	T2	N0	M0	II	YES	Negative	LIVING	NO	No	YES	Primary Tumor	1229	0	1229	0	high	1
TCGA.EW.A1P0.01	<60	FEMALE	Other	LumB	Positive	Negative	Negative	Post	T2	N1	MX	II	YES	Negative	LIVING	YES	No	YES	Primary Tumor	1251	0	1094	1	high	1
TCGA.EW.A1P1.01	>=60	FEMALE	Infiltrating Ductal Carcinoma		Negative	Negative	Equivocal	Post	T2	N3	MX	III	YES	Negative	LIVING	YES	No	YES	Primary Tumor	1210	0	1014	1	high	1
TCGA.EW.A1P3.01	<60	FEMALE	Infiltrating Ductal Carcinoma	LumA	Positive	Positive	Negative	Pre	T2	N0	MX	II	YES	Negative	LIVING	NO	No	YES	Primary Tumor	1611	0	1611	0	high	1
TCGA.EW.A1P4.01	<60	FEMALE	Other	Basal	Negative	Negative	Negative	Pre	T2	N0	M0	II	YES	Negative	LIVING	YES	No	YES	Primary Tumor	907	0	907	0	high	1
TCGA.EW.A1P5.01	>=60	FEMALE	Infiltrating Ductal Carcinoma	LumA	Positive	Positive	Negative	Post	T2	N1	M0	II	YES	Negative	LIVING	YES	No	YES	Primary Tumor	703	0	703	0	low	1
TCGA.EW.A1P6.01	>=60	FEMALE	Infiltrating Ductal Carcinoma	LumA	Positive	Positive	Negative	Post	T2	N1	M0	II	YES	Close	LIVING	YES	No	YES	Primary Tumor	562	0	562	0	high	1
TCGA.EW.A1P7.01	<60	FEMALE	Infiltrating Ductal Carcinoma	Normal	Negative	Negative	Equivocal	Post	T2	N0	M0	II	YES	Negative	LIVING	NO	No	YES	Primary Tumor	915	0	729	1	high	1
TCGA.EW.A1P8.01	<60	FEMALE	Infiltrating Ductal Carcinoma	Basal	Negative	Negative	Negative	Post	T2	N3	M0	III	YES	Negative	DECEASED	NO	No	YES	Primary Tumor	239	1	207	1	high	1
TCGA.EW.A1PA.01	<60	FEMALE	Infiltrating Ductal Carcinoma	LumA	Positive	Positive	Negative	Post	T2	N1	M0	II	YES	Negative	LIVING	YES	No	YES	Primary Tumor	575	0	575	0	high	1
TCGA.EW.A1PB.01	>=60	FEMALE	Infiltrating Ductal Carcinoma	Basal	Negative	Negative	Negative	Post	T3	N1	MX	III	YES	Negative	LIVING	NO	No	NO	Primary Tumor	608	0	608	0	high	1
TCGA.EW.A1PC.01	>=60	FEMALE	Infiltrating Ductal Carcinoma	LumB	Positive	Positive	Negative	Post	T3	N0	MX	II	YES	Negative	LIVING	NO	No	YES	Primary Tumor	187	0	187	0	low	1
TCGA.EW.A1PD.01	>=60	MALE	Infiltrating Ductal Carcinoma	LumA	Positive	Positive	Equivocal		T1	N1	M0	II	YES	Negative	LIVING	NO	No	YES	Primary Tumor	424	0	424	0	low	1
TCGA.EW.A1PE.01	<60	FEMALE	Infiltrating Ductal Carcinoma	LumA	Positive	Positive	Negative	Post	T1	N1	M0	II	YES	Negative	LIVING	YES	No	YES	Primary Tumor	320	0	320	0	low	1
TCGA.EW.A1PF.01	<60	FEMALE	Infiltrating Ductal Carcinoma	LumA	Positive	Positive	Negative	Post	T1	N0	M0	I	YES	Negative	LIVING	NO	No	YES	Primary Tumor	439	0	439	0	high	1
TCGA.EW.A1PG.01	<60	FEMALE	Infiltrating Lobular Carcinoma	Normal	Positive	Positive	Equivocal	Post	T2	N1	MX	II	YES	Negative	LIVING	NO	No	YES	Primary Tumor	1051	0	1051	0	low	1
TCGA.EW.A1PH.01	<60	FEMALE	Infiltrating Ductal Carcinoma	Basal	Negative	Negative	Negative	Post	T1	N1	M0	II	YES	Negative	LIVING	YES	No	YES	Primary Tumor	607	0	607	0	low	1
TCGA.EW.A2FR.01	<60	FEMALE	Infiltrating Ductal Carcinoma	Her2	Negative	Negative	Equivocal	Post	T1	N3	MX	III	YES	Negative	LIVING	YES	No	YES	Primary Tumor	1673	0	1673	0	high	1
TCGA.EW.A2FS.01	<60	FEMALE	Infiltrating Ductal Carcinoma	LumA	Positive	Negative	Negative	Pre	T2	N1	MX	II	YES	Negative	LIVING	YES	No	YES	Primary Tumor	1604	0	1604	0	high	1
TCGA.EW.A2FV.01	<60	FEMALE	Other	LumA	Positive	Positive	Negative	Pre	T3	N3	MX	III		Negative	LIVING	YES	No	YES	Primary Tumor	788	0	788	0	high	1
TCGA.EW.A2FW.01	<60	FEMALE	Other	LumB	Positive	Positive	Negative	Post	T2	N0	MX	II	YES	Negative	LIVING	YES	No	YES	Primary Tumor	672	0	672	0	high	1
TCGA.EW.A3E8.01	>=60	FEMALE	Infiltrating Lobular Carcinoma		Positive	Negative	Negative		T3	N0	MX	II	YES	Negative	LIVING	YES	No		Primary Tumor	1035	0	1035	0	high	1
TCGA.EW.A3U0.01	>=60	FEMALE	Infiltrating Ductal Carcinoma		Negative	Negative	Negative	Post	T3	N1	M0	III	YES	Negative	LIVING	YES	No		Primary Tumor	532	0	532	0	high	1
TCGA.EW.A423.01	>=60	FEMALE	Infiltrating Lobular Carcinoma		Positive	Positive	Negative	Post	T2	N0	MX	II	YES	Negative	LIVING		No		Primary Tumor	533	0	533	0	high	1
TCGA.EW.A424.01	<60	FEMALE	Infiltrating Lobular Carcinoma		Positive	Positive	Positive		T3	N1	MX	III	YES	Negative	LIVING	YES	No		Primary Tumor	715	0	715	0	low	1
TCGA.EW.A6S9.01	<60	FEMALE	Infiltrating Ductal Carcinoma		Positive	Positive	Positive		T1	N1	M0	II	YES		LIVING	NO	No		Primary Tumor	463	0	463	0	low	1
TCGA.EW.A6SA.01	<60	MALE	Infiltrating Ductal Carcinoma		Positive	Negative	Negative		T2	N0	MX	II	YES	Negative	LIVING	NO	No		Primary Tumor	510	0	510	0	low	1
TCGA.EW.A6SB.01	>=60	FEMALE	Infiltrating Ductal Carcinoma		Negative	Negative	Negative		T2	N0	M0	II	YES	Negative	LIVING	YES	No		Primary Tumor	760	0	760	0	high	1
TCGA.EW.A6SC.01	>=60	FEMALE	Infiltrating Lobular Carcinoma		Positive	Positive	Negative		T2	N0	M0	II	YES	Negative	LIVING	YES	No		Primary Tumor	952	0	952	0	high	1
TCGA.EW.A6SD.01	<60	FEMALE	Infiltrating Ductal Carcinoma		Negative	Negative			T2	N1	M0	II	YES	Negative	LIVING	YES	No		Primary Tumor	1010	0	1010	0	low	1
TCGA.GI.A2C8.01	>=60	FEMALE	Infiltrating Ductal Carcinoma	LumA	Positive	Positive	Negative		T4	N0	MX	III	YES	Negative	LIVING	YES	Yes	YES	Primary Tumor	225	0	225	0	high	1
TCGA.GI.A2C9.01	<60	FEMALE	Infiltrating Ductal Carcinoma	Basal	Negative	Negative	Negative	Post	T3	N0	MX	II	YES	Negative	LIVING	YES	No	YES	Primary Tumor	3342	0	3342	0	low	1
TCGA.GM.A2D9.01	>=60	FEMALE	Infiltrating Ductal Carcinoma	LumA	Positive	Positive		Post	T1	N0	M0	I	YES	Negative	DECEASED	YES	No		Primary Tumor	1812	1	536	1	high	1
TCGA.GM.A2DA.01	<60	FEMALE	Infiltrating Ductal Carcinoma	LumA	Positive	Positive	Equivocal	Post	T2	N1	M0	II	YES	Negative	DECEASED	YES	No		Primary Tumor	6593	1	3014	1	high	1
TCGA.GM.A2DB.01	>=60	FEMALE	Infiltrating Ductal Carcinoma	Her2	Negative	Negative	Negative	Post	T2	N0	M0	II	YES	Negative	LIVING	YES	No		Primary Tumor	2406	0	2406	0	high	1
TCGA.GM.A2DC.01	<60	FEMALE	Infiltrating Ductal Carcinoma	LumA	Positive	Positive		Post	T1	N1	M0	II	YES	Negative	LIVING	YES	No		Primary Tumor	2535	0	2535	0	low	1
TCGA.GM.A2DD.01	<60	FEMALE	Infiltrating Ductal Carcinoma	Normal	Negative	Negative	Equivocal	Post	T1	N0	M0	I	YES	Negative	LIVING	NO	No		Primary Tumor	2282	0	2282	0	high	1
TCGA.GM.A2DF.01	<60	FEMALE	Infiltrating Ductal Carcinoma	Basal	Negative	Negative	Negative	Post	T1	N1	M0	II	YES	Negative	LIVING	YES	No		Primary Tumor	2155	0	2155	0	high	1
TCGA.GM.A2DH.01	<60	FEMALE	Infiltrating Ductal Carcinoma	Her2	Negative	Negative	Negative	Post	T1	N0	M0	I	YES	Negative	LIVING	NO	No		Primary Tumor	2193	0	2193	0	high	1
TCGA.GM.A2DI.01	<60	FEMALE	Infiltrating Ductal Carcinoma	LumA	Negative	Negative		Pre	T1	N0	M0	I	YES	Negative	LIVING	NO	No		Primary Tumor	2590	0	2590	0	high	1
TCGA.GM.A2DK.01	<60	FEMALE	Infiltrating Ductal Carcinoma	LumA	Positive	Negative	Negative	Post	T1	N0	M0	I	YES	Negative	LIVING	YES	No		Primary Tumor	2645	0	2645	0	high	1
TCGA.GM.A2DL.01	<60	FEMALE	Infiltrating Ductal Carcinoma	LumA	Positive	Positive	Negative	Peri	T1	N0	M0	I	YES	Negative	LIVING	YES	No		Primary Tumor	3519	0	3519	0	high	1
TCGA.GM.A2DM.01	<60	FEMALE	Infiltrating Ductal Carcinoma	LumA	Positive	Positive	Negative	Post	T2	N0	M0	II	YES	Negative	LIVING	YES	No		Primary Tumor	3226	0	3226	0	low	1
TCGA.GM.A2DN.01	<60	FEMALE	Infiltrating Ductal Carcinoma	LumA	Positive	Positive	Negative	Post	T2	N0	M0	II	YES	Negative	LIVING	NO	No		Primary Tumor	3091	0	3091	0	high	1
TCGA.GM.A2DO.01	<60	FEMALE	Infiltrating Lobular Carcinoma	LumB	Positive	Positive	Negative	Post	T1	N0	M0	I	YES	Negative	LIVING	YES	No		Primary Tumor	2596	0	2596	0	high	1
TCGA.GM.A3NW.01	>=60	FEMALE	Infiltrating Lobular Carcinoma		Negative	Positive	Equivocal	Post	T2	N0	M0	II	YES	Negative	LIVING	NO	No		Primary Tumor	3361	0	3361	0	high	1
TCGA.GM.A3NY.01	>=60	FEMALE	Infiltrating Lobular Carcinoma	LumA	Positive	Positive	Negative	Post	T2	N1	M0	II	YES	Negative	LIVING	YES	No		Primary Tumor	1162	0	1162	0	high	1
TCGA.GM.A3XG.01	<60	FEMALE	Infiltrating Lobular Carcinoma		Positive	Positive	Negative	Pre	T3	N1	M0	III	YES	Negative	LIVING	YES	No		Primary Tumor	1330	0	1330	0	high	1
TCGA.GM.A3XL.01	<60	FEMALE	Infiltrating Ductal Carcinoma		Negative	Negative		Post	T2	N0	M0	II	YES	Negative	LIVING	YES	No		Primary Tumor	2108	0	2108	0	high	1
TCGA.GM.A3XN.01	<60	FEMALE	Infiltrating Lobular Carcinoma		Positive	Positive	Negative	Post	T1	N2	M0	III	YES	Negative	LIVING	YES	No		Primary Tumor	2019	0	2019	0	high	1
TCGA.GM.A4E0.01	>=60	FEMALE	Infiltrating Lobular Carcinoma		Positive	Positive		Post	T3	N3	M0	III	YES	Negative	LIVING	YES	No		Primary Tumor	2191	0	2191	0	high	1
TCGA.GM.A5PV.01	>=60	FEMALE	Infiltrating Lobular Carcinoma		Positive	Positive		Post	T2	N1	M0	II	YES	Negative	LIVING	NO	No		Primary Tumor	412	0	412	0	high	1
TCGA.GM.A5PX.01	>=60	FEMALE	Infiltrating Lobular Carcinoma		Positive	Positive	Negative	Post	T2	N1	M0	II	YES	Negative	LIVING	NO	No		Primary Tumor	551	0	551	0	high	1
TCGA.HN.A2NL.01	<60	FEMALE	Infiltrating Lobular Carcinoma	Basal	Negative	Negative	Negative	Post	T2	N0	M0	II	YES	Negative	LIVING		No		Primary Tumor	79	0	79	0	high	1
TCGA.HN.A2OB.01	<60	FEMALE	Infiltrating Lobular Carcinoma		Positive	Positive	Negative	Pre	T2	N1	M0	II	YES	Negative	DECEASED	YES	No		Primary Tumor	1900	1	1552	1	high	1
TCGA.JL.A3YW.01	<60	FEMALE	Infiltrating Lobular Carcinoma		Positive	Positive	Positive	Post	T2	N1	M0	II	YES	Negative	LIVING	NO	No		Primary Tumor	360	0	360	0	high	1
TCGA.JL.A3YX.01	<60	FEMALE	Infiltrating Lobular Carcinoma		Positive	Positive	Positive	Post	T2	N0	M0	II	YES	Negative	LIVING	NO	No		Primary Tumor	352	0	352	0	low	1
TCGA.LD.A66U.01	<60	FEMALE	Infiltrating Lobular Carcinoma		Positive	Positive	Negative		T2	N1	MX	II	YES	Negative	LIVING	YES	No		Primary Tumor	646	0	646	0	high	1
TCGA.LD.A74U.01	>=60	FEMALE	Other		Positive	Negative	Negative		T3	N3	M0	III	YES	Negative	LIVING	NO	No		Primary Tumor	402	0	402	0	high	1
TCGA.LD.A7W5.01	<60	FEMALE	Infiltrating Ductal Carcinoma		Positive	Positive	Negative	Pre	T2	N3	M0	III	YES	Positive	LIVING	NO	No		Primary Tumor	216	0	216	0	high	1
TCGA.LD.A7W6.01	<60	FEMALE	Other		Positive	Positive	Negative	Post	T2	N1	M0	II	YES	Negative	LIVING	NO	No		Primary Tumor	404	0	404	0	high	1
TCGA.LD.A9QF.01	>=60	FEMALE	Infiltrating Ductal Carcinoma		Negative	Negative	Positive	Post	T1	N0	M0	I	YES	Negative	LIVING	NO	No		Primary Tumor	323	0	323	0	high	1
TCGA.LL.A440.01	>=60	FEMALE	Infiltrating Lobular Carcinoma		Positive	Positive	Equivocal	Post	T1	N0	MX	I	YES	Negative	LIVING	NO	No		Primary Tumor	759	0	759	0	high	1
TCGA.LL.A441.01	>=60	FEMALE	Infiltrating Ductal Carcinoma		Negative	Negative	Negative	Post	T1	N0	MX	I	YES	Negative	LIVING	YES	No		Primary Tumor	996	0	996	0	high	1
TCGA.LL.A442.01	<60	FEMALE	Infiltrating Ductal Carcinoma		Positive	Positive	Equivocal	Post	T2	N0	MX	II	YES	Negative	LIVING	NO	No		Primary Tumor	889	0	889	0	low	1
TCGA.LL.A50Y.01	>=60	FEMALE	Infiltrating Lobular Carcinoma		Positive	Positive	Equivocal	Post	T2	N0	MX	II	YES	Negative	LIVING	NO	No		Primary Tumor	762	0	762	0	high	1
TCGA.LL.A5YL.01	>=60	FEMALE	Infiltrating Lobular Carcinoma		Positive	Negative	Positive	Post	T2	N1	MX	II	YES	Negative	LIVING	YES	No		Primary Tumor	519	0	519	0	high	1
TCGA.LL.A5YM.01	>=60	FEMALE	Infiltrating Ductal Carcinoma		Positive	Positive	Equivocal	Post	T4	NX	M0	III	NO	Positive	LIVING	NO	No		Primary Tumor	466	0	258	1	high	1
TCGA.LL.A5YN.01	<60	FEMALE	Infiltrating Ductal Carcinoma		Positive	Positive	Equivocal	Post	T2	N0	M0	II	YES	Negative	LIVING	YES	No		Primary Tumor	447	0	447	0	high	1
TCGA.LL.A5YO.01	<60	FEMALE	Infiltrating Ductal Carcinoma		Negative	Negative	Negative	Pre	T1	N0	MX	I	YES	Negative	LIVING	YES	No		Primary Tumor	440	0	440	0	high	1
TCGA.LL.A5YP.01	<60	FEMALE	Infiltrating Ductal Carcinoma		Positive	Negative	Negative	Post	T2	N1	M0	II	YES	Negative	LIVING	YES	No		Primary Tumor	450	0	450	0	high	1
TCGA.LL.A6FP.01	>=60	FEMALE	Infiltrating Lobular Carcinoma		Positive	Positive	Equivocal	Post	T2	NX	MX	II	NO	Negative	LIVING	NO	Yes		Primary Tumor	677	0	677	0	low	1
TCGA.LL.A6FQ.01	>=60	FEMALE	Infiltrating Ductal Carcinoma		Positive	Positive	Negative	Post	T2	N2	MX	III	YES	Negative	LIVING	NO	No		Primary Tumor	80	0			low	1
TCGA.LL.A6FR.01	<60	FEMALE	Infiltrating Ductal Carcinoma		Negative	Positive	Equivocal	Post	T2	N0	MX	II	YES	Negative	LIVING	YES	No		Primary Tumor	489	0	489	0	low	1
TCGA.LL.A73Y.01	>=60	FEMALE	Infiltrating Ductal Carcinoma		Negative	Negative	Negative	Post	T1	N0	MX	I	YES	Negative	LIVING	NO	No		Primary Tumor	477	0	477	0	high	1
TCGA.LL.A73Z.01	<60	FEMALE	Infiltrating Ductal Carcinoma		Positive	Positive	Equivocal	Post	T1	NX	M1	IV	NO	Positive	DECEASED	YES	No		Primary Tumor	227	1	192	1	high	1
TCGA.LL.A740.01	>=60	FEMALE	Infiltrating Ductal Carcinoma		Negative	Negative	Equivocal	Post	T1	N0	MX	I	YES	Negative	LIVING	NO	No		Primary Tumor	441	0	441	0	low	1
TCGA.LL.A7SZ.01	<60	FEMALE	Infiltrating Ductal Carcinoma		Positive	Positive	Negative	Pre	T2	N1	MX	II	YES	Negative	LIVING	YES	No		Primary Tumor	594	0	594	0	high	1
TCGA.LL.A7T0.01	>=60	FEMALE	Infiltrating Ductal Carcinoma		Positive	Positive	Positive	Post	T2	N1	M0	II	YES	Negative	LIVING	NO	No		Primary Tumor	376	0	376	0	low	1
TCGA.LL.A8F5.01	>=60	FEMALE	Infiltrating Ductal Carcinoma		Positive	Negative	Negative	Post	T2	N0	MX	II	YES	Negative	LIVING	YES	No		Primary Tumor	596	0	596	0	high	1
TCGA.LL.A9Q3.01	>=60	FEMALE	Infiltrating Lobular Carcinoma		Positive	Positive	Positive	Post	T3	N3	MX	III	YES	Negative	LIVING	YES	No		Primary Tumor	532	0	532	0	high	1
TCGA.LQ.A4E4.01	>=60	FEMALE	Infiltrating Lobular Carcinoma		Positive	Positive		Post	T3	N1	MX	III	YES	Positive	LIVING	YES	No		Primary Tumor	849	0	681	1	low	1
TCGA.MS.A51U.01	<60	FEMALE	Infiltrating Lobular Carcinoma		Positive	Positive	Negative		T2	N1	M0	II	YES	Negative	LIVING	YES	No		Primary Tumor	681	0	681	0	high	1
TCGA.OK.A5Q2.01	<60	FEMALE	Infiltrating Lobular Carcinoma		Positive	Positive	Negative		T2	N1	MX	II	YES	Negative	LIVING		No		Primary Tumor	64	0	64	0	high	1
TCGA.OL.A5D6.01	>=60	FEMALE	Infiltrating Ductal Carcinoma		Negative	Negative		Post	T2	N0	MX	II	YES	Negative	DECEASED	NO	No		Primary Tumor	1104	1	1104	0	high	1
TCGA.OL.A5D7.01	>=60	FEMALE	Infiltrating Ductal Carcinoma		Negative	Negative		Post	T2	N0	MX	II	YES	Negative	LIVING	YES	No		Primary Tumor	1780	0	1780	0	high	1
TCGA.OL.A5D8.01	<60	FEMALE	Infiltrating Ductal Carcinoma		Positive	Positive		Pre	T3	N0	MX	II	YES		LIVING	YES	No		Primary Tumor	973	0	973	0	low	1
TCGA.OL.A5DA.01	>=60	FEMALE	Infiltrating Lobular Carcinoma		Positive	Positive		Post	T2	N0	MX	II	YES	Negative	LIVING	NO	No		Primary Tumor	1783	0	1783	0	low	1
TCGA.OL.A5RU.01	>=60	FEMALE	Infiltrating Ductal Carcinoma		Positive	Positive		Post	T1	N1	MX	II	YES	Negative	LIVING	YES	No		Primary Tumor	1219	0	1219	0	high	1
TCGA.OL.A5RV.01	<60	FEMALE	Infiltrating Ductal Carcinoma		Positive	Positive		Pre	T2	N3	MX	III	YES	Negative	LIVING	YES	No		Primary Tumor	1062	0	1062	0	low	1
TCGA.OL.A5RW.01	<60	FEMALE	Infiltrating Ductal Carcinoma		Negative	Negative		Pre	T1	N1	MX	II	YES	Negative	LIVING	YES	No		Primary Tumor	1106	0	1106	0	low	1
TCGA.OL.A5RX.01	<60	FEMALE	Infiltrating Ductal Carcinoma		Positive	Positive		Pre	T1	N0	MX	I	YES	Negative	LIVING	NO	No		Primary Tumor	878	0	878	0	high	1
TCGA.OL.A5RY.01	<60	FEMALE	Infiltrating Ductal Carcinoma		Positive	Negative		Post	T1	N1	MX	II	YES	Positive	LIVING	YES	No		Primary Tumor	752	0	752	0	high	1
TCGA.OL.A5RZ.01	<60	FEMALE	Infiltrating Ductal Carcinoma		Positive	Negative		Post	T1	N0	MX	I	YES	Negative	LIVING	NO	No		Primary Tumor	679	0	679	0	low	1
TCGA.OL.A5S0.01	>=60	FEMALE	Infiltrating Ductal Carcinoma		Positive	Negative		Post	T2	N1	MX	II	YES	Negative	LIVING	YES	No		Primary Tumor	620	0	620	0	high	1
TCGA.OL.A66H.01	>=60	FEMALE	Other		Positive	Positive		Post	T1	N1	MX	I	YES	Negative	LIVING	YES	No		Primary Tumor	812	0	812	0	high	1
TCGA.OL.A66I.01	<60	FEMALE	Infiltrating Ductal Carcinoma		Negative	Negative			T1	N1	MX	II	YES	Negative	LIVING	YES	No		Primary Tumor	714	0	714	0	high	1
TCGA.OL.A66J.01	>=60	FEMALE	Infiltrating Lobular Carcinoma		Positive	Positive		Post	T1	N0	MX	I	YES	Negative	LIVING	YES	No		Primary Tumor	1996	0	1996	0	high	1
TCGA.OL.A66K.01	>=60	FEMALE	Infiltrating Lobular Carcinoma		Positive	Positive	Equivocal	Post	T2	N0	MX	II	YES	Negative	DECEASED	NO	No		Primary Tumor	1275	1	1275	0	low	1
TCGA.OL.A66L.01	>=60	FEMALE	Infiltrating Ductal Carcinoma		Positive	Positive		Post	T1	N0	MX	I	YES	Negative	LIVING	YES	No		Primary Tumor	1301	0	1301	0	high	1
TCGA.OL.A66N.01	<60	FEMALE	Infiltrating Lobular Carcinoma		Positive	Negative		Post	T3	N3	MX	III	YES	Negative	LIVING	YES	No		Primary Tumor	792	0	792	0	high	1
TCGA.OL.A66O.01	<60	FEMALE	Infiltrating Ductal Carcinoma		Positive	Positive		Pre	T2	N1	MX	II	YES	Negative	LIVING	YES	No		Primary Tumor	528	0	528	0	low	1
TCGA.OL.A66P.01	>=60	FEMALE	Infiltrating Ductal Carcinoma		Negative	Negative			T2	N0	MX	II	YES	Negative	LIVING	NO	No		Primary Tumor	428	0	428	0	high	1
TCGA.OL.A6VO.01	<60	FEMALE	Infiltrating Ductal Carcinoma		Negative	Negative	Negative		T1	N0	MX	I	YES	Negative	LIVING	YES	No		Primary Tumor	858	0	858	0	high	1
TCGA.OL.A6VQ.01	<60	FEMALE	Infiltrating Lobular Carcinoma		Positive	Positive		Pre	T2	N0	MX	II	YES	Positive	LIVING	NO	No		Primary Tumor	600	0	600	0	high	1
TCGA.OL.A6VR.01	<60	FEMALE	Infiltrating Ductal Carcinoma		Positive	Positive	Negative		T1	N0	MX	I	YES	Negative	LIVING	NO	No		Primary Tumor	1220	0	1220	0	low	1
TCGA.OL.A97C.01	>=60	FEMALE	Other		Negative	Negative		Post	T3	N0	M0	II	YES		LIVING	NO	No		Primary Tumor	271	0	271	0	high	1
TCGA.PE.A5DC.01	>=60	FEMALE	Infiltrating Lobular Carcinoma		Positive	Positive	Positive	Post	T2	N2	M0	III	YES		DECEASED	YES	No		Primary Tumor	1430	1	1430	0	high	1
TCGA.PE.A5DD.01	>=60	FEMALE	Infiltrating Lobular Carcinoma		Positive	Negative	Positive	Post	T2	N0	M0	II	YES	Negative	LIVING	YES	No		Primary Tumor	1953	0	1953	0	high	1
TCGA.PE.A5DE.01	<60	FEMALE	Infiltrating Lobular Carcinoma		Positive	Positive	Negative	Pre	T2	N0	M0	II	YES		LIVING	YES	No		Primary Tumor	2645	0	2645	0	high	1
TCGA.PL.A8LV.01	<60	FEMALE	Other						T4	N0	M0	III	NO		LIVING	NO	No		Primary Tumor					high	1
TCGA.PL.A8LX.01	<60	FEMALE	Infiltrating Ductal Carcinoma					Pre	T4	N1	M1	IV	YES		LIVING	NO	No		Primary Tumor	5	0			low	1
TCGA.PL.A8LY.01	<60	FEMALE	Infiltrating Ductal Carcinoma					Pre	T3	N0	M0	II	NO		LIVING	NO	No		Primary Tumor	8	0	8	0	high	1
TCGA.PL.A8LZ.01	<60	FEMALE	Infiltrating Ductal Carcinoma					Pre	T4	N2	M0	III			LIVING	NO	No		Primary Tumor	302	0	302	0	high	1
TCGA.S3.A6ZF.01	>=60	FEMALE	Infiltrating Ductal Carcinoma		Positive	Positive	Equivocal	Post	T2	N0	M0	II	YES	Negative	LIVING	NO	No		Primary Tumor	572	0	572	0	high	1
TCGA.S3.A6ZG.01	>=60	FEMALE	Other		Positive	Positive	Negative	Post	T2	N1	M0	II	YES	Negative	LIVING	YES	No		Primary Tumor	562	0	562	0	high	1
TCGA.S3.A6ZH.01	<60	FEMALE	Infiltrating Ductal Carcinoma		Positive	Positive	Equivocal		T3	N3	MX	III	YES	Negative	LIVING	YES	No		Primary Tumor	641	0	641	0	high	1
TCGA.S3.AA0Z.01	>=60	FEMALE	Infiltrating Ductal Carcinoma		Positive	Positive	Equivocal	Post	T2	N1	M0	II	YES	Negative	LIVING	NO	No		Primary Tumor	629	0	629	0	high	1
TCGA.S3.AA10.01	>=60	FEMALE	Infiltrating Ductal Carcinoma		Negative	Negative	Negative	Post	T2	N0	M0	II	YES	Negative	LIVING	NO	No		Primary Tumor	586	0	586	0	high	1
TCGA.S3.AA11.01	>=60	FEMALE	Infiltrating Ductal Carcinoma		Positive	Positive	Equivocal	Post	T2	N0	M0	II	YES	Negative	LIVING	YES	No		Primary Tumor	421	0	421	0	low	1
TCGA.S3.AA12.01	>=60	FEMALE	Infiltrating Ductal Carcinoma		Positive	Negative	Negative	Post	T3	N1	MX	III	YES	Negative	LIVING	NO	No		Primary Tumor	574	0	574	0	low	1
TCGA.S3.AA14.01	<60	FEMALE	Infiltrating Ductal Carcinoma		Positive	Positive	Positive	Post	T1	N0	M0	I	YES	Negative	LIVING	YES	No		Primary Tumor	529	0	529	0	high	1
TCGA.S3.AA15.01	<60	FEMALE	Infiltrating Ductal Carcinoma		Negative	Negative	Negative	Post	T2	N1	M0	II	YES	Negative	LIVING	YES	No		Primary Tumor	525	0	525	0	high	1
TCGA.S3.AA17.01	>=60	FEMALE	Infiltrating Ductal Carcinoma		Positive	Positive	Equivocal	Post	T2	N1	M0	II	YES	Negative	LIVING	YES	No		Primary Tumor	424	0	424	0	high	1
TCGA.UL.AAZ6.01	>=60	FEMALE	Infiltrating Ductal Carcinoma		Positive	Positive	Positive	Post	T2	N0	MX	II			LIVING	NO	No		Primary Tumor	518	0	518	0	low	1
TCGA.UU.A93S.01	>=60	FEMALE	Infiltrating Ductal Carcinoma		Negative	Negative	Positive	Post	T4	N3	M1	IV	NO	Positive	DECEASED	NO	No		Primary Tumor	116	1	116	0	low	1
TCGA.V7.A7HQ.01	>=60	FEMALE	Infiltrating Ductal Carcinoma		Positive	Positive		Post	T1	N2	M0	III	YES	Positive	LIVING	YES	No		Primary Tumor	2033	0	2033	0	low	1
TCGA.W8.A86G.01	>=60	FEMALE	Infiltrating Lobular Carcinoma		Positive	Positive	Negative	Post	T2	N0	MX	II	YES	Negative	LIVING	NO	No		Primary Tumor	347	0	347	0	low	1
TCGA.WT.AB41.01	<60	FEMALE	Infiltrating Ductal Carcinoma		Positive	Positive		Post	T2	N1	MX	II	YES	Negative	LIVING	NO	No		Primary Tumor	1611	0	1611	0	high	1
TCGA.WT.AB44.01	>=60	FEMALE	Infiltrating Lobular Carcinoma		Positive	Positive	Negative	Post	T1	N0	MX	I	YES	Negative	LIVING	YES	No		Primary Tumor	883	0	883	0	high	1
TCGA.XX.A899.01	<60	FEMALE	Infiltrating Lobular Carcinoma		Positive	Positive	Negative	Post	T1	N2	MX	III	YES	Negative	LIVING	YES	No		Primary Tumor	467	0	467	0	high	1
TCGA.XX.A89A.01	>=60	FEMALE	Infiltrating Lobular Carcinoma		Positive	Positive	Negative	Post	T3	N0	MX	II	YES	Negative	LIVING	YES	No		Primary Tumor	488	0	488	0	high	1
TCGA.Z7.A8R5.01	>=60	FEMALE	Infiltrating Lobular Carcinoma		Positive	Positive	Negative	Post	T3	N1	MX	III	YES	Positive	LIVING	NO	No		Primary Tumor	3287	0	3287	1	high	1
TCGA.Z7.A8R6.01	<60	FEMALE	Infiltrating Lobular Carcinoma		Positive	Positive	Negative	Pre	T1	N0	M0	I	YES	Negative	LIVING	NO	No		Primary Tumor	3256	0	3256	0	low	1
