# Supplementary material for: The prognostic significance of KLRB1 and its further association with immune cells in breast cancer
Source: PeerJ. 2023 Jul 24;11:e15654. doi: 10.7717/peerj.15654 (PMC10373647; doi:10.7717/peerj.15654)
Supplement: File S2 [file peerj-11-15654-s003.xlsx]

## Sheet: Sheet1
	Age	Breat	TNM stage	T stage	N stage	MBNG	Clinical stage	ER	PR	HER-2	Ki-67（%）	KLRB1 staining
												paratumor	tumor
1	56	Left	T1cN0M0	1	0	II	I A	3+	3+	-	0.3	+	weak+
2	61	Right	T1cN2M0	1	2	II	IIIA	3+	3+	1+	0.05	+	-
3	45	Right	T2N0M0	2	0	II	II A	2+	3+	2+	0.3	+	-
4	59	Right	T1cN0M0	1	0	II	I A	2+	2+	-	0.2	+	-
5	41	Left	T1N1M0	1	1	II	II A	3+	3+	1+	0.1	+	-
6	67	Right	T1N0M0	0	0	II	I A	3+	1+	1+	0.1	+	weak+
7	50	Left	T1N0M0	0	0	II	I A	-	-	3+	0.4	+	-
8	35	Right	T1N1M0	1	1	II	II A	1+	2+	-	0.3	+	-
9	42	Right	T2N1M0	2	1	II	II B	3+	2+	1+	0.2	+	-
10	62	Right	T1N2M0	1	2	II	IIIA	3+	2+	1+	0.2	+	-
11	28	Right	T1aN0M0	1	0	III	I A	-	-	-	0.7	+	-
12	33	Right	T1N0M0	0	0	II	I A	2+	2+	1+	0.05	+	weak+
13	42	Right	T1N0M0	1	0	II	I A	2+	2+	-	0.1	+	-
14	50	Right	T2N1M0	2	1	III	II B	-	-	-	0.6	+	-
15	50	Left	T2N1M0	2	1	II	IIB	1+	-	3+	0.4	+	-
16	42	Right	T1cN3M0	1	3	II	IIIC	3+	3+	-	0.1	+	-
17	48	Left	T2N1cM0	2	1	II	IIB	1+	3+	-	0.15	+	-
18	60	Right	T1N0M0	1	0	II	IA	3+	3+	1+	0.2	+	-
19	39	Left	T1cN0M0	1	0	II	IA	3+	-	1+	0.2	+	-
20	47	Right	T1N0M0	1	0	II	IA	3+	3+	-	0.05	+	-
21	58	Right	T2N0M0	2	0	II	IIA	-	-	-	0.2	+	-
22	72	Right	T2N0M0	2	0	II	IIA	2+	2+	2+	0.05	+	-
23	69	Left	T1N0M0	1	0	II	IA	3+	3+	2+	0.2	+	weak+
